# Supplementary material for: Machine Learning Analysis Identifies Drosophila Grunge/Atrophin as an Important Learning and Memory Gene Required for Memory Retention and Social Learning
Source: G3 (Bethesda). 2017 Sep 9;7(11):3705–18. doi: 10.1534/g3.117.300172 (PMC5677163; doi:10.1534/g3.117.300172)
Supplement: Supplementary file 10 [file 3705FileS1.xlsx]

## Sheet: Sheet1
32999	1		amn	Dmel_CG11937	Amn|CG11937|Dmel\CG11937|Drm-amn|EP(X)1442|PACAP|PACAP-38|PACAP-like|PACAP38|PACAP38-like|Pacap38|chpd	FLYBASE:FBgn0086782	X	18F4-19A2	amnesiac	protein-coding	amn	amnesiac	O	CG11937-PA|amn-PA|cheap date|cheapdate|pituitary adenylyl cyclase-activating polypeptide|pituitary adenylyl cyclase-activating polypeptide-like	20131208
44817	1		for	Dmel_CG10033	142251_at|BcDNA:GM08338|CG10033|DG2|Dg2|Dmel\CG10033|FOR/PKG|For|PKG|Pkg2|Pkg24A|anon-WO0140519.260|anon-WO02059370.47|dg2|l(2)06860	FLYBASE:FBgn0000721	2L	24A2-24A4|2-10 cM	foraging	protein-coding	for	foraging	O	CG10033-PA|CG10033-PB|CG10033-PC|CG10033-PD|CG10033-PE|CG10033-PF|CG10033-PG|CG10033-PH|CG10033-PI|CG10033-PJ|CG10033-PK|for-PA|for-PB|for-PC|for-PD|for-PE|for-PF|for-PG|for-PH|for-PI|for-PJ|for-PK	20131121
45928	1		shi	Dmel_CG18102	CG18102|DNM3|DYN|Ddyn|Ddyn3|Ddyn4|Dmel\CG18102|Dyn|Shi|anon-WO0153538.12|anon-WO0153538.13|anon-WO0153538.14|dDyn|dyn|l(1)VII|l(1)shi|shibere	FLYBASE:FBgn0003392	X	13F18-13F18|1-51.5 cM	shibire	protein-coding	shi	shibire	O	CG18102-PA|CG18102-PB|CG18102-PC|CG18102-PE|CG18102-PF|CG18102-PG|CG18102-PH|CG18102-PI|CG18102-PJ|CG18102-PK|CG18102-PL|CG18102-PM|CG18102-PN|CG18102-PO|dynamin|shi-PA|shi-PB|shi-PC|shi-PE|shi-PF|shi-PG|shi-PH|shi-PI|shi-PJ|shi-PK|shi-PL|shi-PM|shi-PN|shi-PO|shibere|shibiri	20131107
32817	1		CrebB-17A	Dmel_CG6103	CG6103|CRE-BP|CREB|CREB-B|CREB-b|CREB2|CREB2a|CREB2b|Creb|Creb17A|Creb2|Creb2-b|Creb2.b|Creb2b|CrebB|CrebB17-A|Dmel\CG6103|S162|dCREB|dCREB-2|dCREB-2a|dCREB-B|dCREB2|dCREB2-a|dCREB2-b|dCREB2a|dCREB2b|dCbz|dCreb2|dCreb2-b|dCrebB2|dcreb2-b|l(1)17Af	FLYBASE:FBgn0014467	X	17A7-17A8	Cyclic-AMP response element binding protein B at 17A	protein-coding	CrebB-17A	Cyclic-AMP response element binding protein B at 17A	O	CG6103-PD|CG6103-PE|CG6103-PF|CG6103-PG|CG6103-PH|CG6103-PI|CG6103-PJ|CG6103-PK|CG6103-PL|CG6103-PM|CG6103-PN|CG6103-PO|CrebB-17A-PD|CrebB-17A-PE|CrebB-17A-PF|CrebB-17A-PG|CrebB-17A-PH|CrebB-17A-PI|CrebB-17A-PJ|CrebB-17A-PK|CrebB-17A-PL|CrebB-17A-PM|CrebB-17A-PN|CrebB-17A-PO|activator|blocker|cAMP response element-binding protein|cAMP-regulated enhancer-binding protein|cAMP-response element bindi…	20131103
32406	1		rut	Dmel_CG9533	AC|Ac12F|CG9533|Dmel\CG9533|EP1603|RUT|Rut|Rut-AC	FLYBASE:FBgn0003301	X	12F4-12F5	rutabaga	protein-coding	rut	rutabaga	O	CG9533-PA|CG9533-PB|CG9533-PC|CG9533-PD|CG9533-PE|CG9533-PF|RUTABAGA|rut-PA|rut-PB|rut-PC|rut-PD|rut-PE|rut-PF|rutabage	20131208
39018	1		orb2	Dmel_CG43782	CG43113|CG43782|CG5735|Dmel\CG43782|Dmel_CG43113|Dmel_CG5735|Dmel_CG5741|Orb2|anon-WO0140519.222|cg5735	FLYBASE:FBgn0264307	3L	66E4-66E5	CG43782 gene product from transcript CG43782-RH	protein-coding	orb2	-	O	CG43782-PA|CG43782-PB|CG43782-PC|CG43782-PD|CG43782-PH|orb2-PA|orb2-PB|orb2-PC|orb2-PD|orb2-PH
38654	1		S6k	Dmel_CG10539	10539|7084|CG10539|DS6K|Dmel\CG10539|Dp70S6k|Dp70[s6k]|Dp70s6k|S6K|S6K1|S6k|S6K|dS6K|dS6k|dp70[S6k]|dp70s6k|dps6k|ds6k|fs(3)07084|l(3)07084|p70 S6K|p70/S6K|p70S6K|p70[S6 kinase]|p70[S6K]|p70[S6k]|p70[S6kinase]|p70s6K|s6k|s6k11	FLYBASE:FBgn0015806	3L	64E8-64E11	RPS6-p70-protein kinase	protein-coding	S6k	RPS6-p70-protein kinase	O	CG10539-PA|CG10539-PB|S6 kinase|S6-kinase|S6k-PA|S6k-PB|S6kinase|dS6 kinase|p70 S6 kinase|p70 ribosomal S6 kinase|ribosomal S6 protein kinase|ribosomal protein S6 kinase
43149	1		Nf1	Dmel_CG8318	CG8318|Dmel\CG8318|NF-1|NF1|Nf-1|dNF1|nf1	FLYBASE:FBgn0015269	3R	96F9-96F9	Neurofibromin 1	protein-coding	Nf1	Neurofibromin 1	O	CG8318-PB|CG8318-PC|CG8318-PD|CG8318-PE|CG8318-PF|Neurofibromatosis-1|Nf1-PB|Nf1-PC|Nf1-PD|Nf1-PE|Nf1-PF|neurofibramatosis-1|neurofibromatosis 1|neurofibromatosis factor 1|neurofibromatosis type 1|neurofibromin|neurofibromin 1
37528	1		Fmr1	Dmel_CG6203	AT24755|BcDNA:GM08679|CG6203|Dmel\CG6203|EP(3)3517|FMR|FMR1|FMRP|FMRp|FXR|Fmrp|cg6203|dFMR|dFMR1|dFMRP|dFXR|dFXR1|dFXRP|dFmr1|dFmrp|dfmr|dfmr1|dfxr|dfxr1|dmfr1|fmr|fmr1	FLYBASE:FBgn0028734	3R	85F10-85F12	CG6203 gene product from transcript CG6203-RC	protein-coding	Fmr1	-	O	CG6203-PA|CG6203-PB|CG6203-PC|CG6203-PD|CG6203-PE|CG6203-PF|CG6203-PG|CG6203-PH|CG6203-PI|Fmr1-PA|Fmr1-PB|Fmr1-PC|Fmr1-PD|Fmr1-PE|Fmr1-PF|Fmr1-PG|Fmr1-PH|Fmr1-PI|Fragile-X mental retardation protein|Fragile-X-related|dFmr1|drosophila fragile X mental retardation protein|fragile X|fragile X mental retardation|fragile X mental retardation 1|fragile X mental retardation gene|fragile X mental retarda…
41957	1		Akt1	Dmel_CG4006	AKT|AKT/PKB|AKT1|Akt|Akt/PKB|Akt1|PKB|CG4006|D-Akt|DAKT1|DAKT1/PKB|DAkt|DAkt1|DPKB|DRAC-PK|DRAC-PK66|DRAC-PK85|Dakt|Dakt1|Dmel\CG4006|Dpkb|PKB|PKB/AKT|PKB/Akt|PKB/dAKT|RAC|RacPK|akt|akt1|dAKT|dAKT/dPKB|dAKT1|dAkt|dAkt/PKB|dAkt1|dPKB|dakt|dakt1|l(3)04226|l(3)89Bq|p-Akt|pAkt	FLYBASE:FBgn0010379	3R	89B3-89B3	CG4006 gene product from transcript CG4006-RA	protein-coding	Akt1	-	O	Akt kinase|Akt1-PA|Akt1-PB|Akt1-PC|CG4006-PA|CG4006-PB|CG4006-PC|dAkt kinase|protein kinase B|related to PKA to PKC protein kinases|related to the A and C kinases
47082	1		Adf1	Dmel_CG15845	Adf 1|Adf-1|CG15845|Dmel\CG15845|adf-1|adf1|l(2)01349|l(2)04065|nal	FLYBASE:FBgn0000054	2R	42C3-42C3	Adh transcription factor 1	protein-coding	Adf1	Adh transcription factor 1	O	Adf1-PA|Adf1-PB|Adf1-PC|Adf1-PE|CG15845-PA|CG15845-PB|CG15845-PC|CG15845-PE|nalyot|naylot
43828	1		CaMKII	Dmel_CG18069	CAMKII|CAMKIIalpha|CAMKIId|CDPK1|CG18069|Ca2ﷆꖚ蝮阩�dependent protein kinase II|CaM|CaM II|CaM KII|CaM kinase|CaMK II|CaMK-II|Calcium/calmodulin-dependent protein kinase|Cam|CamKII|CamKIIalpha|Camkii|DCK|Dmel\CG18069|calcium/calmodulin-dependent protein kinase II|camKII|dCaMKII|l(4)102EFb|l(4)16|l(4)ar	FLYBASE:FBgn0264607	4	102F6-102F2|4-1 cM	Calcium/calmodulin-dependent protein kinase II	protein-coding	CaMKII	Calcium/calmodulin-dependent protein kinase II	O	CG18069-PA|CG18069-PB|CG18069-PC|CG18069-PD|CG18069-PE|CG18069-PG|CG18069-PH|CG18069-PI|CG18069-PJ|CG18069-PK|CG18069-PL|CG18069-PM|CaM kinase|CaM kinase II|CaM-kinase-II|CaMKII-PA|CaMKII-PB|CaMKII-PC|CaMKII-PD|CaMKII-PE|CaMKII-PG|CaMKII-PH|CaMKII-PI|CaMKII-PJ|CaMKII-PK|CaMKII-PL|CaMKII-PM|Ca[2]/calmodulin-dependent protein kinase II|Calcium/calmodulin-dependent protein kinase|calcium/ calmodulin…
34035	-1		Spn28B	Dmel_CG6717	CG6717|Dmel\CG6717|Spn7	FLYBASE:FBgn0083141	2L	28B3-28B3	Serpin 28B	protein-coding	Spn28B	Serpin 28B	O	CG6717-PA|CG6717-PB|Spn28B-PA|Spn28B-PB|serine protease inhibitor 7|serpin 28B
34198	-1		CG9314	Dmel_CG9314	CT26521|Dmel\CG9314|anon-WO0140519.249	FLYBASE:FBgn0032061	2L	29E4-29E4	CG9314 gene product from transcript CG9314-RC	protein-coding	CG9314	-	O	CG9314-PA|CG9314-PC|kitty
41351	-1		CG17187	Dmel_CG17187	BcDNA:RE47242|Dmel\CG17187	FLYBASE:FBgn0037882	3R	86D8-86D8	CG17187 gene product from transcript CG17187-RA	protein-coding	CG17187	-	O	CG17187-PA
246528	-1		CG30285	Dmel_CG30285	Dmel\CG30285	FLYBASE:FBgn0050285	2R	57F8-57F8	CG30285 gene product from transcript CG30285-RA	protein-coding	CG30285	-	O	CG30285-PA
34223	-1		CG34223	Dmel_CG34223	Dmel\CG34223	FLYBASE:FBgn0085252	2R	47E1-47E1	CG34223 gene product from transcript CG34223-RA	protein-coding	CG34223	-	O	CG34223-PA
32200	-1		CG15730	Dmel_CG15730	Dmel\CG15730	FLYBASE:FBgn0030395	X	11A12-11A12	CG15730 gene product from transcript CG15730-RA	protein-coding	CG15730	-	O	CG15730-PA
43841	-1		unc-13	Dmel_CG2999	CG2999|DUNC-13|Dmel\CG2999|Dunc-13|Dunc13|Munc-13|Munc-13/UNC-13|UNC-13|UNC-13-B|Unc-13|dUNC-13|dUnc-13|drunc13|dunc-13|l(4)ry16|unc	FLYBASE:FBgn0025726	4	102E5-102F1	CG2999 gene product from transcript CG2999-RD	protein-coding	unc-13	-	O	CG2999-PA|CG2999-PB|CG2999-PC|CG2999-PD|CG2999-PE|CG2999-PF|lethal (4) ry16|unc-13-PA|unc-13-PB|unc-13-PC|unc-13-PD|unc-13-PE|unc-13-PF
41343	-1		RpS25	Dmel_CG6684	CG6684|D25|Dmel\CG6684|M(3)86D|M(3)S31|M(3)S32|M(3)s[32]|Rp S25|RpS31|S25|anon-EST:Posey260	FLYBASE:FBgn0086472	3R	86D8-86D8|3-50.0 cM	Ribosomal protein S25	protein-coding	RpS25	Ribosomal protein S25	O	CG6684-PA|CG6684-PB|RpS25-PA|RpS25-PB|minute (3) 86D|minute (3) S32|ribosomal protein S25
246572	-1		CG30369	Dmel_CG30369	Dmel\CG30369|NEST:bs06h11	FLYBASE:FBgn0050369	2R	44C3-44C3	CG30369 gene product from transcript CG30369-RA	protein-coding	CG30369	-	O	CG30369-PA
42772	-1		CG10177	Dmel_CG10177	Dmel\CG10177	FLYBASE:FBgn0039083	3R	95A1-95A1	CG10177 gene product from transcript CG10177-RA	protein-coding	CG10177	-	O	CG10177-PA|MLCK-like
33829	-1		Vm26Aa	Dmel_CG9048	CG9048|Dmel\CG9048|TU-2|VM26A.1|VM26Aa|Vm26A|Vm26A.1|Vm26A1|sV17	FLYBASE:FBgn0003979	2L	26A3-26A3	Vitelline membrane 26Aa	protein-coding	Vm26Aa	Vitelline membrane 26Aa	O	CG9048-PA|CG9048-PB|Vm26Aa-PA|Vm26Aa-PB|vitelline membrane 26Aa
246550	-1		CG30340	Dmel_CG30340	BACR48G21.1|BG:BACR48G21.1|Dmel\CG30340	FLYBASE:FBgn0050340	2R	45F6-45F6	CG30340 gene product from transcript CG30340-RA	protein-coding	CG30340	-	O	CG30340-PA
3354971	-1		Set1	Dmel_CG40351	CG17395|CG17396|CG40351|Dmel\CG40351|aaf45425 Dm|dSet1|l(3)h5	FLYBASE:FBgn0040022	3LHet	-	CG40351 gene product from transcript CG40351-RF	protein-coding	Set1	-	O	CG40351-PA|CG40351-PB|CG40351-PC|CG40351-PD|CG40351-PE|CG40351-PF|CG40351-PG|CG40351-PH|CG40351-PI|Set1-PA|Set1-PB|Set1-PC|Set1-PD|Set1-PE|Set1-PF|Set1-PG|Set1-PH|Set1-PI|lethal 5
33937	-1		cort	Dmel_CG11330	CG11330|Cort|Dmel\CG11330|cor	FLYBASE:FBgn0000351	2L	26F7-26F7|2-49 cM	cortex	protein-coding	cort	cortex	O	CG11330-PA|CG11330-PB|cdc20-like|cort-PA|cort-PB
48632	-1		Act87E	Dmel_CG18290	Act87e|Actin|CG18290|Dmel\CG18290|E|act 87E|act87E|actin|mus87E	FLYBASE:FBgn0000046	3R	87E11-87E11	Actin 87E	protein-coding	Act87E	Actin 87E	O	Act87E-PA|Act87E-PB|CG18290-PA|CG18290-PB|actin|actin 87E|actin87E
43930	-1		prc	Dmel_CG5700	BEST:CK01593|CG5700|CK01593|Dmel\CG5700|EC11|Pc|Prc|pc	FLYBASE:FBgn0028573	3L	68E3-68E4	pericardin	protein-coding	prc	pericardin	O	CG5700-PB|prc-PB
42232	-1		CG14304	Dmel_CG14304	Dmel\CG14304	FLYBASE:FBgn0038629	3R	91B5-91B6	CG14304 gene product from transcript CG14304-RA	protein-coding	CG14304	-	O	CG14304-PA|CG14304-PB|CG14304-PC
36205	-1		CG42336	Dmel_CG42336	BcDNA:AT13707|CG13210|CG13211|Dmel\CG42336|Dmel_CG13210|Dmel_CG13211	FLYBASE:FBgn0259238	2R	47F1-47F1	CG42336 gene product from transcript CG42336-RB	protein-coding	CG42336	-	O	CG42336-PB|CG42336-PC|CG42336-PD|CG42336-PE|CG42336-PF
35597	-1		CG9447	Dmel_CG9447	Dmel\CG9447	FLYBASE:FBgn0033110	2R	42D6-42D6	CG9447 gene product from transcript CG9447-RC	protein-coding	CG9447	-	O	CG9447-PC
37220	-1		CG9975	Dmel_CG9975	Dmel\CG9975	FLYBASE:FBgn0034435	2R	56D1-56D1	CG9975 gene product from transcript CG9975-RA	protein-coding	CG9975	-	O	CG9975-PA|CG9975-PB
32144	-1		CG1847	Dmel_CG1847	Dmel\CG1847	FLYBASE:FBgn0030345	X	10F2-10F2	CG1847 gene product from transcript CG1847-RA	protein-coding	CG1847	-	O	CG1847-PA|CG1847-PC
35936	-1		CG8046	Dmel_CG8046	Dmel\CG8046	FLYBASE:FBgn0033388	2R	45B1-45B1	CG8046 gene product from transcript CG8046-RA	protein-coding	CG8046	-	O	CG8046-PA|CG8046-PB
36644	-1		CG42254	Dmel_CG42254	CG12854|CR30478|Dmel\CG42254|Dmel_CG12854|Dmel_CR30478	FLYBASE:FBgn0259112	2R	51C2-51C2	CG42254 gene product from transcript CG42254-RD	protein-coding	CG42254	-	O	CG42254-PB|CG42254-PC|CG42254-PD|CR30478
43720	-1		CG1635	Dmel_CG1635	Dmel\CG1635	FLYBASE:FBgn0039854	3R	100C7-100C7	CG1635 gene product from transcript CG1635-RA	protein-coding	CG1635	-	O	CG1635-PA
34138	-1		CG1635	Dmel_CG1635	Dmel\CG1635	FLYBASE:FBgn0039854	3R	100C7-100C7	CG1635 gene product from transcript CG1635-RA	protein-coding	CG1635	-	O	CG1635-PA
38905	-1		mus301	Dmel_CG7972	CG7972|Dmel\CG7972|SpnC|anon-WO0118547.354|cg7972|mus(3)301|spn-C|spnC	FLYBASE:FBgn0002899	3L	66B8-66B8|3-23 cM	mutagen-sensitive 301	protein-coding	mus301	mutagen-sensitive 301	O	CG7972-PA|mus301-PA|spindel|spindle C|spindle-C
39411	-1		Obp69a	Dmel_CG10436	69a|CG10436|DmelObp69a|Dmel\CG10436|PB-PRP1|PBP1|PBPRP-1|Pbprp1|pbprp-1|pbprp1	FLYBASE:FBgn0011279	3L	69B4-69B4	Odorant-binding protein 69a	protein-coding	Obp69a	Odorant-binding protein 69a	O	CG10436-PA|Obp69a-PA|Pheromone-binding protein-related protein 1
31024	-1		tw	Dmel_CG12311	CG12311|DPOMT2|DmPOMT2|Dmel\CG12311|EG:34F3.7|POMT2|Pomt2|dPOMT2	FLYBASE:FBgn0086368	X	1C4-1D4|1-0.4 cM	Protein O-mannosyltransferase 2	protein-coding	tw	Protein O-mannosyltransferase 2	O	CG12311-PA|CG12311-PB|protein O-mannosyltransferase 2|tricky-dickey|tw-PA|tw-PB|twisted
34289	-1		CG13117	Dmel_CG13117	BcDNA:SD27505|Dmel\CG13117	FLYBASE:FBgn0032140	2L	30C6-30C6	CG13117 gene product from transcript CG13117-RB	protein-coding	CG13117	-	O	CG13117-PA|CG13117-PB
32533	-1		CG15602	Dmel_CG15602	Dmel\CG15602	FLYBASE:FBgn0030694	X	13F1-13F1	CG15602 gene product from transcript CG15602-RA	protein-coding	CG15602	-	O	CG15602-PA
40537	-1		TwdlV	Dmel_CG14640	CG14640|Dmel\CG14640	FLYBASE:FBgn0037227	3R	82A1-82A1	TweedleV	protein-coding	TwdlV	TweedleV	O	CG14640-PA|TwdlV-PA
261616	-1		CG31778	Dmel_CG31778	BcDNA:HL03084|Dmel\CG31778	FLYBASE:FBgn0051778	2L	24C1-24C1	CG31778 gene product from transcript CG31778-RA	protein-coding	CG31778	-	O	CG31778-PA
43791	-1		lgs	Dmel_CG2041	BCL9|CG2041|Dm Lgs|Dmel\CG2041|Lgl|Lgs	FLYBASE:FBgn0039907	4	102B8-102C1	legless	protein-coding	lgs	legless	O	CG2041-PA|lgs-PA
32941	-1		CoRest	Dmel_CG42687	BcDNA:GH01486|BcDNA:LD11215|CG32534|CG32535|CG33525|CG3878|CG42687|CoREST|Dmel\CG42687|Dmel_CG32534|Dmel_CG33525|dCoREST|i169	FLYBASE:FBgn0261573	X	18C8-18C8	CG42687 gene product from transcript CG42687-RC	protein-coding	CoRest	-	O	CG42687-PA|CG42687-PC|CG42687-PD|CG42687-PE|CG42687-PF|CG42687-PG|CG42687-PH|CG42687-PI|CG42687-PJ|CG42687-PK|CoRest-PA|CoRest-PC|CoRest-PD|CoRest-PE|CoRest-PF|CoRest-PG|CoRest-PH|CoRest-PI|CoRest-PJ|CoRest-PK
43210	-1		TwdlD	Dmel_CG14243	CG14243|Dmel\CG14243	FLYBASE:FBgn0039444	3R	97C3-97C3	TweedleD	protein-coding	TwdlD	TweedleD	O	CG14243-PA|TwdlD-PA
5740498	-1		CG34202	Dmel_CG34202	Dmel\CG34202	FLYBASE:FBgn0085231	2R	57B2-57B2	CG34202 gene product from transcript CG34202-RA	protein-coding	CG34202	-	O	CG34202-PA
37123	-1		Prp19	Dmel_CG5519	BcDNA:LD02793|CG5519|Dmel\CG5519|GPB|Gbp|l(2)07838|prp19	FLYBASE:FBgn0261119	2R	55D1-55C9	CG5519 gene product from transcript CG5519-RA	protein-coding	Prp19	-	O	CG5519-PA|GTP-binding regulatory protein beta chain|Prp19-PA
7354427	-1		CG42287	Dmel_CG42287	CG13353|Dmel\CG42287|Dmel_CG13353	FLYBASE:FBgn0259183	2R	50D5-50D5	CG42287 gene product from transcript CG42287-RA	protein-coding	CG42287	-	O	CG42287-PA
37825	-1		CG3860	Dmel_CG3860	Dmel\CG3860	FLYBASE:FBgn0034951	2R	60B1-60B1	CG3860 gene product from transcript CG3860-RA	protein-coding	CG3860	-	O	CG3860-PA
35445	-1		CG1832	Dmel_CG1832	Dmel\CG1832	FLYBASE:FBgn0032979	2L	40F2-40F2	CG1832 gene product from transcript CG1832-RB	protein-coding	CG1832	-	O	CG1832-PA|CG1832-PB
36961	-1		mthl3	Dmel_CG6530	104/8|BEST:GM02553|CG6530|Dmel\CG6530|GENE 1|Mth-3|anon-WO0170980.52|anon-WO0170980.53|gene 1|l(2)k10408|mthl-3	FLYBASE:FBgn0028956	2R	54B16-54B16	methuselah-like 3	protein-coding	mthl3	methuselah-like 3	O	CG6530-PA|Mth-like 3|mthl3-PA
37138	-1		CG5327	Dmel_CG5327	Dmel\CG5327|NEST:bs33e07	FLYBASE:FBgn0034363	2R	55E2-55E2	CG5327 gene product from transcript CG5327-RA	protein-coding	CG5327	-	O	CG5327-PA
34620	-1		CG6785	Dmel_CG6785	Dmel\CG6785|cg6785	FLYBASE:FBgn0032399	2L	33B10-33B11	CG6785 gene product from transcript CG6785-RA	protein-coding	CG6785	-	O	CG6785-PA
39686	-1		CG6498	Dmel_CG6498	Dmel\CG6498|MAST 205|MAST205	FLYBASE:FBgn0036511	3L	71E1-71E1	CG6498 gene product from transcript CG6498-RB	protein-coding	CG6498	-	O	CG6498-PA|CG6498-PB
35122	-1		CG10336	Dmel_CG10336	Dmel\CG10336	FLYBASE:FBgn0032698	2L	37A1-37A1	CG10336 gene product from transcript CG10336-RC	protein-coding	CG10336	-	O	CG10336-PA|CG10336-PC
35425	-1		step	Dmel_CG11628	CG11628|CG11633|CYH1|Dmel\CG11628|GPH|GRP1|GRP1/cytohesin 1|Grp1|cytohesin/GRP1|l(2)SH0323|l(2)SH2 0323|l(2)k08110|stepk	FLYBASE:FBgn0086779	2L	40A1-39F3	steppke	protein-coding	step	steppke	O	CG11628-PA|CG11628-PC|CG11628-PD|CG11628-PE|general receptor for phosphoinositides 1|general receptor for phosphoinositides-1|lethal (2) SH0323|lethal (2) k08110|step-PA|step-PC|step-PD|step-PE
53554	-1		krz	Dmel_CG1487	0952/14|CG1487|Dmel\CG1487|Krz|Kurz|l(3)S095214	FLYBASE:FBgn0040206	3R	100E3-100E3	kurtz	protein-coding	krz	kurtz	O	CG1487-PA|CG1487-PB|krz-PA|krz-PB|kurtz-arrestin
34764	-1		CG42810	Dmel_CG42810	CG16849|Dmel\CG42810|Dmel_CG16849	FLYBASE:FBgn0261992	2L	34C1-34C1	CG42810 gene product from transcript CG42810-RA	protein-coding	CG42810	-	O	CG42810-PA
41309	-1		SelR	Dmel_CG6584	BcDNA:RE36040|BcDNA:RH61230|CG6584|Dmel\CG6584|MsrB|dMsrB|selR	FLYBASE:FBgn0037847	3R	86C7-86C7	CG6584 gene product from transcript CG6584-RI	protein-coding	SelR	-	O	CG6584-PA|CG6584-PB|CG6584-PC|CG6584-PE|CG6584-PG|CG6584-PH|CG6584-PI|CG6584-PJ|SelR-PA|SelR-PB|SelR-PC|SelR-PE|SelR-PG|SelR-PH|SelR-PI|SelR-PJ|methionine-R-sulfoxide reductase
41309	-1		CG42810	Dmel_CG42810	CG16849|Dmel\CG42810|Dmel_CG16849	FLYBASE:FBgn0261992	2L	34C1-34C1	CG42810 gene product from transcript CG42810-RA	protein-coding	CG42810	-	O	CG42810-PA
41309	-1		SelR	Dmel_CG6584	BcDNA:RE36040|BcDNA:RH61230|CG6584|Dmel\CG6584|MsrB|dMsrB|selR	FLYBASE:FBgn0037847	3R	86C7-86C7	CG6584 gene product from transcript CG6584-RI	protein-coding	SelR	-	O	CG6584-PA|CG6584-PB|CG6584-PC|CG6584-PE|CG6584-PG|CG6584-PH|CG6584-PI|CG6584-PJ|SelR-PA|SelR-PB|SelR-PC|SelR-PE|SelR-PG|SelR-PH|SelR-PI|SelR-PJ|methionine-R-sulfoxide reductase
42548	-1		CG15498	Dmel_CG15498	Dmel\CG15498	FLYBASE:FBgn0038892	3R	93E4-93E4	CG15498 gene product from transcript CG15498-RA	protein-coding	CG15498	-	O	CG15498-PA
41058	-1		CG9821	Dmel_CG9821	CG31442|Dmel\CG9821|Ov29|anon-WO0118547.399|anon-WO0118547.424	FLYBASE:FBgn0037636	3R	85B2-85B2	CG9821 gene product from transcript CG9821-RC	protein-coding	CG9821	-	O	CG9821-PA|CG9821-PB|CG9821-PC|CG9821-PD
40293	-1		Pex16	Dmel_CG3947	CG3947|DmelPex16|Dmel\CG3947|pex16	FLYBASE:FBgn0037019	3L	77E6-77E6	Peroxin 16	protein-coding	Pex16	Peroxin 16	O	CG3947-PA|Pex16-PA|peroxin 16
31052	-1		CDC45L	Dmel_CG3658	CDC45|CG3658|Cdc45|D|DmCdc45|Dmel\CG3658|EG:BACR7A4.11|anon-1Ec|cdc45|dCDC45	FLYBASE:FBgn0026143	X	1E1-1E1	CG3658 gene product from transcript CG3658-RA	protein-coding	CDC45L	-	O	CDC45L-PA|CG3658-PA|transcription unit D
32361	-1		CG1368	Dmel_CG1368	Dmel\CG1368	FLYBASE:FBgn0030539	X	12E2-12E2	CG1368 gene product from transcript CG1368-RA	protein-coding	CG1368	-	O	CG1368-PA
36300	-1		CG13178	Dmel_CG13178	Dmel\CG13178	FLYBASE:FBgn0033685	2R	48E2-48E2	CG13178 gene product from transcript CG13178-RA	protein-coding	CG13178	-	O	CG13178-PA
36614	-1		ttv	Dmel_CG10117	CG10117|DEXT1|Dmel\CG10117|Ext1|P1.15|Ttv|l(2)00681|l(2)05282|l(2)k00115|l(2)k03617	FLYBASE:FBgn0020245	2R	51A7-51B4	tout-velu	protein-coding	ttv	tout-velu	O	CG10117-PA|CG10117-PB|CG10117-PC|tout velu|toutvelu|ttv-PA|ttv-PB|ttv-PC
42390	-1		CG4424	Dmel_CG4424	Dmel\CG4424	FLYBASE:FBgn0038765	3R	92C1-92C1	CG4424 gene product from transcript CG4424-RA	protein-coding	CG4424	-	O	CG4424-PA
38888	-1		CG8209	Dmel_CG8209	Dmel\CG8209|anon-WO0172774.138	FLYBASE:FBgn0035830	3L	66A21-66A21	CG8209 gene product from transcript CG8209-RA	protein-coding	CG8209	-	O	CG8209-PA|UBA/UBX 33.3 kDa protein like
46078	-1		vlc	Dmel_CG8390	CG8390|Dmel\CG8390|X|anon-41Fa|anon-WO0118547.98|l(2)07022	FLYBASE:FBgn0259978	2R	41F9-41F8	vulcan	protein-coding	vlc	vulcan	O	CG8390-PA|CG8390-PB|CG8390-PC|CG8390-PE|CG8390-PF|CG8390-PG|CG8390-PH|CG8390-PI|anon-41Fa|transcription unit X|vlc-PA|vlc-PB|vlc-PC|vlc-PE|vlc-PF|vlc-PG|vlc-PH|vlc-PI
35952	-1		CG2063	Dmel_CG2063	Dmel\CG2063	FLYBASE:FBgn0033400	2R	45C1-45C1	CG2063 gene product from transcript CG2063-RA	protein-coding	CG2063	-	O	CG2063-PA
38771	-1		CG8641	Dmel_CG8641	Dmel\CG8641	FLYBASE:FBgn0035733	3L	65E2-65E3	CG8641 gene product from transcript CG8641-RB	protein-coding	CG8641	-	O	CG8641-PA|CG8641-PB
44783	-1		RpL37A	Dmel_CG5827	BcDNA:RE23595|BcDNA:RH41593|CG5827|DmL37a|Dmel\CG5827|L37A|M(2)25C|M(2)S1|RpL37a|l(2)25Cb	FLYBASE:FBgn0261608	2L	25C4-25C4|2-15.0 cM	Ribosomal protein L37A	protein-coding	RpL37A	Ribosomal protein L37A	O	CG5827-PA|CG5827-PB|CG5827-PC|RpL37A-PA|RpL37A-PB|RpL37A-PC|minute (2) 25C|ribosomal protein L37A|ribosomal protein L37a
35147	-1		tup	Dmel_CG10619	CG10619|Dmel\CG10619|Isl|Tup|isl|islet|l(2)37Aa|l(2)E41	FLYBASE:FBgn0003896	2L	37B1-37B1|2-53.9 cM	tailup	protein-coding	tup	tailup	O	CG10619-PA|CG10619-PB|dIslet|islet|islet 1|lethal(2)37Aa|tailup/islet|tup-PA|tup-PB
47729	-1		CG16833	Dmel_CG16833	BEST:LD13681|Dmel\CG16833|LD13681	FLYBASE:FBgn0026147	2L	32C1-32C1	CG16833 gene product from transcript CG16833-RG	protein-coding	CG16833	-	O	CG16833-PD|CG16833-PE|CG16833-PF|CG16833-PG|CG16833-PH|CG16833-PI|CG16833-PJ|CG16833-PK|CG16833-PL|CG16833-PM|CG16833-PN
53428	-1		wds	Dmel_CG17437	CG17437|Dmel\CG17437|EG:BACR25B3.7|WDR5|WDS|Wds|l(1)16-94|l(1)3Ad|l(1)G0251|l(1)zw8|zw-8|zw8	FLYBASE:FBgn0040066	X	3A6-3A6|1-1.2 cM	will die slowly	protein-coding	wds	will die slowly	O	CG17437-PA|CG17437-PB|lethal(1)3Ad|wds-PA|wds-PB
5740518	-1		CG40968	Dmel_CG40968	Dmel\CG40968	FLYBASE:FBgn0085546	un	-	CG40968 gene product from transcript CG40968-RB	protein-coding	CG40968	-	O	CG40968-PB
39986	-1		CG5567	Dmel_CG5567	Dmel\CG5567|Phos5567	FLYBASE:FBgn0036760	3L	75A4-75A4	CG5567 gene product from transcript CG5567-RA	protein-coding	CG5567	-	O	CG5567-PA
38174	-1		cue	Dmel_CG12086	CG12086|CT5570|Dmel\CG12086|ms(3)02509	FLYBASE:FBgn0011204	3L	62A3-62A3	cueball	protein-coding	cue	cueball	O	CG12086-PA|cue-PA
34947	-1		beat-Ia	Dmel_CG4846	BG:DS00913.3|Beat Ia|CCT|CG4846|CT15567|Cct|Dmel\CG4846|TRiC|beat|beat Ia|beat1a|l(2)35Ea|l(2)35Eb|l(2)br47|l(2)br48|tric	FLYBASE:FBgn0013433	2L	35E2-35E2	beaten path Ia	protein-coding	beat-Ia	beaten path Ia	O	CG4846-PA|beat-Ia-PA|beaten path|chaperonin containing TCP-1|triclops
47763	-1		Abd-B	Dmel_CG11648	9|ABD-B|ABDB|Abd B|Abd-b|Abd0B|AbdB|AbdB(CA)[[26]]|AbdB-I|AbdB-II|Abdb|AdbB|BX-C|CG10291|CG11648|DROABDB|DmAbdB|Dmel\CG11648|Droabdb|FAB|Fab-6|Fab-7|Fab-8|Fab7|IAB 5|IAB5|IAB8|Iab-7|MCP|Mc|Mcp|Sab|Tab|Uab-5[Sab]|abd-B|abdB|bex|iab|iab-5|iab-6|iab-7|iab-8|iab5|iab6|iab7|iab8|iab8.9|iab9|l(3)89Ed|pH189|tuh-3|twig	FLYBASE:FBgn0000015	3R	89E4-89E5|3-58.8 cM	Abdominal B	protein-coding	Abd-B	Abdominal B	O	Abd-B-PA|Abd-B-PB|Abd-B-PC|Abd-B-PD|Abd-B-PE|Abd-B-PF|Abdominal-B|AbdominalB|CG11648-PA|CG11648-PB|CG11648-PC|CG11648-PD|CG11648-PE|CG11648-PF|abdominal B|abdominal-A|corset|infra-abdominal 5|infra-abdominal 6|infra-abdominal 7|infra-abdominal 8|infra-abdominal 9|infraabdominal|infraabdominal-8.9|male chauvinist pigmentation|microcephalus|miscadastral pigmentation|superabdominal|transabdominal
35655	-1		Gr43a	Dmel_CG1712	43C.1|43C1|CG1712|DmGr43a|Dmel\CG1712|GR43C.1|Gr43C1	FLYBASE:FBgn0041243	2R	43B2-43B2	Gustatory receptor 43a	protein-coding	Gr43a	Gustatory receptor 43a	O	CG1712-PA|CG1712-PB|Gr43a-PA|Gr43a-PB|gustatory receptor 43C.1|gustatory receptor 43a
3771966	-1		CG9960	Dmel_CG9960	CG32951|Dmel\CG9960|Dromel_CG9960_CG9958_FBtr007773_snapin_mORF	FLYBASE:FBgn0031454	2L	23A3-23A3	CG9960 gene product from transcript CG9960-RA	protein-coding	CG9960	-	O	CG9960-PA
7354465	-1		CG42232	Dmel_CG42232	CG14896|CG14897|Dmel\CG42232|Dmel_CG14896|Dmel_CG14897|anon-EST:Liang-1.14|clone 1.14	FLYBASE:FBgn0250754	3R	89B17-89B17	CG42232 gene product from transcript CG42232-RB	protein-coding	CG42232	-	O	CG42232-PB
3771834	-1		5SrRNA:CR33434	Dmel_CR33434	CR33434|Dmel\CR33434	FLYBASE:FBgn0053434	2R	56E2-56E2	5S ribosomal RNA	rRNA	5SrRNA:CR33434	-	O	-
35251	-1		CG13078	Dmel_CG13078	Dmel\CG13078	FLYBASE:FBgn0032809	2L	37F1-37F1	CG13078 gene product from transcript CG13078-RA	protein-coding	CG13078	-	O	CG13078-PA
3885567	-1		Dyrk3	Dmel_CG40478	BcDNA:RE60792|CG40478|DDYRK3|DYRK3|Dm3|Dmel\CG40478	FLYBASE:FBgn0027101	4	102F8-102F8	CG40478 gene product from transcript CG40478-RE	protein-coding	Dyrk3	-	O	CG40478-PA|CG40478-PC|CG40478-PE|Dyrk3-PA|Dyrk3-PC|Dyrk3-PE|unknown-telomeric-protein-gene
32666	-1		CG4768	Dmel_CG4768	Dmel\CG4768	FLYBASE:FBgn0030790	X	15A8-15A8	CG4768 gene product from transcript CG4768-RB	protein-coding	CG4768	-	O	CG4768-PA|CG4768-PB
40038	-1		CG6893	Dmel_CG6893	Dmel\CG6893	FLYBASE:FBgn0036807	3L	75D6-75D6	CG6893 gene product from transcript CG6893-RB	protein-coding	CG6893	-	O	CG6893-PB
40924	-1		CG2993	Dmel_CG2993	Dmel\CG2993	FLYBASE:FBgn0037521	3R	84E1-84E1	CG2993 gene product from transcript CG2993-RB	protein-coding	CG2993	-	O	CG2993-PA|CG2993-PB|CG2993-PC
42955	-1		CG6980	Dmel_CG6980	Dmel\CG6980|anon-WO0140519.171	FLYBASE:FBgn0039228	3R	96A23-96A23	CG6980 gene product from transcript CG6980-RA	protein-coding	CG6980	-	O	CG6980-PA
47186	-1		mus205	Dmel_CG1925	154926_at|AAF59191|CG1925|DhRev3|DmREV3|Dmel\CG1925|Dmpolzeta|Mus205|mus 205|mus(2)205|mus-205|rev3	FLYBASE:FBgn0002891	2R	43E17-43E17|2-54.9 cM	mutagen-sensitive 205	protein-coding	mus205	mutagen-sensitive 205	O	CG1925-PA|mus205-PA
5740653	-1		kl-3	Dmel_CG17629	CG17629|CG40443|Dmel\CG17629|Lms3|Y104b|kl-4|kl3|ms(Y)104b	FLYBASE:FBgn0001314	YHet	h8-h8	male fertility factor kl3	protein-coding	kl-3	male fertility factor kl3	O	CG17629-PA|gamma-dynein heavy chain|kl-3-PA
43121	-1		Mst57Dc	Dmel_CG4986	Acp57Dc|CG4986|Dmel\CG4986|Mst75Dc|mst(2)ag-1|mst-1	FLYBASE:FBgn0011670	3R	96F3-96F3	Male-specific RNA 57Dc	protein-coding	Mst57Dc	Male-specific RNA 57Dc	O	CG4986-PA|Mst57Dc-PA|Mst57dc for male accessory gland protein|male specific transcript 57D
44750	-1		Ady43A	Dmel_CG1851	Adk43A|Ady|CG1851|Dmel\CG1851|ady43A	FLYBASE:FBgn0026602	2R	43A1-43A2	CG1851 gene product from transcript CG1851-RA	protein-coding	Ady43A	-	O	Ady43A-PA|CG1851-PA
35292	-1		pr	Dmel_CG16784	38B.9|CG16784|Dmel\CG16784|anon-38Bb	FLYBASE:FBgn0003141	2L	38B3-38B3|2-54.5 cM	purple	protein-coding	pr	purple	O	CG16784-PC|pr-PC
34467	-1		CG17107	Dmel_CG17107	Dmel\CG17107	FLYBASE:FBgn0032281	2L	32A4-32A4	CG17107 gene product from transcript CG17107-RB	protein-coding	CG17107	-	O	CG17107-PA|CG17107-PB|CG17107-PC
3772065	-1		CG33688	Dmel_CG33688	Dmel\CG33688	FLYBASE:FBgn0053688	3L	72D10-72D10	CG33688 gene product from transcript CG33688-RA	protein-coding	CG33688	-	O	CG33688-PA
32169	-1		Usp7	Dmel_CG1490	CG1490|Dmel\CG1490|USP7	FLYBASE:FBgn0030366	X	11A1-11A2	ubiquitin-specific protease 7	protein-coding	Usp7	ubiquitin-specific protease 7	O	CG1490-PB|Usp7-PB
41938	-1		Sap47	Dmel_CG8884	CG8884|Dmel\CG8884|SAP 47|SAP-47|SAP47|dsap-47|sap47	FLYBASE:FBgn0013334	3R	89A8-89A8	Synapse-associated protein 47kD	protein-coding	Sap47	Synapse-associated protein 47kD	O	CG8884-PA|CG8884-PB|CG8884-PC|CG8884-PD|CG8884-PE|CG8884-PF|CG8884-PG|CG8884-PI|CG8884-PJ|Sap47-PA|Sap47-PB|Sap47-PC|Sap47-PD|Sap47-PE|Sap47-PF|Sap47-PG|Sap47-PI|Sap47-PJ
35966	-1		wun	Dmel_CG8804	CG8804|Dmel\CG8804|LPP-like|Wun|Wunen|l(2)k16806	FLYBASE:FBgn0016078	2R	45D3-45D4	wunen	protein-coding	wun	wunen	O	CG8804-PA|CG8804-PB|CG8804-PC|wun-PA|wun-PB|wun-PC
40450	-1		CG7130	Dmel_CG7130	Dmel\CG7130	FLYBASE:FBgn0037151	3L	79B2-79B2	CG7130 gene product from transcript CG7130-RA	protein-coding	CG7130	-	O	CG7130-PA
39633	-1		CG18581	Dmel_CG18581	Dmel\CG18581	FLYBASE:FBgn0036466	3L	71B2-71B2	CG18581 gene product from transcript CG18581-RA	protein-coding	CG18581	-	O	CG18581-PA
40172	-1		Prp3	Dmel_CG7757	CG7757|Dmel\CG7757|PRPF3|dPrp3	FLYBASE:FBgn0036915	3L	76D4-76D4	Precursor RNA processing 3	protein-coding	Prp3	Precursor RNA processing 3	O	CG7757-PA|CG7757-PB|Prp3-PA|Prp3-PB|precursor RNA processing 3
48343	-1		deltaTry	Dmel_CG12351	CG12351|DmDeltaTry|Dmel\CG12351|delta	FLYBASE:FBgn0010358	2R	47F5-47F5	deltaTrypsin	protein-coding	deltaTry	deltaTrypsin	O	CG12351-PA|deltaTry-PA
40221	-1		Clc	Dmel_CG6948	CG6948|CLC|Dmel\CG6948|clc	FLYBASE:FBgn0024814	3L	77A3-77A4	Clathrin light chain	protein-coding	Clc	Clathrin light chain	O	CG6948-PA|CG6948-PB|CG6948-PC|CG6948-PD|Clc-PA|Clc-PB|Clc-PC|Clc-PD|clathrin|clathrin light chain|clathrin-light-chain
318795	-1		CG31551	Dmel_CG31551	CG11005|Dmel\CG31551	FLYBASE:FBgn0051551	3R	83B7-83B7	CG31551 gene product from transcript CG31551-RA	protein-coding	CG31551	-	O	CG31551-PA
34072	-1		CG31551	Dmel_CG31551	CG11005|Dmel\CG31551	FLYBASE:FBgn0051551	3R	83B7-83B7	CG31551 gene product from transcript CG31551-RA	protein-coding	CG31551	-	O	CG31551-PA
3771785	-1		His2A:CG33826	Dmel_CG33826	CG33826|Dmel\CG33826	FLYBASE:FBgn0053826	2L	39D5-39D5	CG33826 gene product from transcript CG33826-RA	protein-coding	His2A:CG33826	-	O	CG33826-PA|His2A:CG33826-PA|histone H2A
32889	-1		CG43759	Dmel_CG43759	CG12527|CG14188|CG32541|CG42506|Dmel\CG43759|Dmel_CG32541|Dmel_CG42506|EP(X)1644|LD15404	FLYBASE:FBgn0264090	X	17F3-18A2	CG43759 gene product from transcript CG43759-RC	protein-coding	CG43759	-	O	CG43759-PA|CG43759-PB|CG43759-PC
34198	-1		CG9314	Dmel_CG9314	CT26521|Dmel\CG9314|anon-WO0140519.249	FLYBASE:FBgn0032061	2L	29E4-29E4	CG9314 gene product from transcript CG9314-RC	protein-coding	CG9314	-	O	CG9314-PA|CG9314-PC|kitty
41351	-1		CG17187	Dmel_CG17187	BcDNA:RE47242|Dmel\CG17187	FLYBASE:FBgn0037882	3R	86D8-86D8	CG17187 gene product from transcript CG17187-RA	protein-coding	CG17187	-	O	CG17187-PA
246528	-1		CG30285	Dmel_CG30285	Dmel\CG30285	FLYBASE:FBgn0050285	2R	57F8-57F8	CG30285 gene product from transcript CG30285-RA	protein-coding	CG30285	-	O	CG30285-PA
34223	-1		CG34223	Dmel_CG34223	Dmel\CG34223	FLYBASE:FBgn0085252	2R	47E1-47E1	CG34223 gene product from transcript CG34223-RA	protein-coding	CG34223	-	O	CG34223-PA
32200	-1		CG15730	Dmel_CG15730	Dmel\CG15730	FLYBASE:FBgn0030395	X	11A12-11A12	CG15730 gene product from transcript CG15730-RA	protein-coding	CG15730	-	O	CG15730-PA
43841	-1		unc-13	Dmel_CG2999	CG2999|DUNC-13|Dmel\CG2999|Dunc-13|Dunc13|Munc-13|Munc-13/UNC-13|UNC-13|UNC-13-B|Unc-13|dUNC-13|dUnc-13|drunc13|dunc-13|l(4)ry16|unc	FLYBASE:FBgn0025726	4	102E5-102F1	CG2999 gene product from transcript CG2999-RD	protein-coding	unc-13	-	O	CG2999-PA|CG2999-PB|CG2999-PC|CG2999-PD|CG2999-PE|CG2999-PF|lethal (4) ry16|unc-13-PA|unc-13-PB|unc-13-PC|unc-13-PD|unc-13-PE|unc-13-PF
41343	-1		CG41343	Dmel_CG41343	Dmel\CG41343|GH10292	FLYBASE:FBgn0085625	3LHet	-	CG41343 gene product from transcript CG41343-RB	protein-coding	CG41343	-	O	CG41343-PB
246572	-1		CG30369	Dmel_CG30369	Dmel\CG30369|NEST:bs06h11	FLYBASE:FBgn0050369	2R	44C3-44C3	CG30369 gene product from transcript CG30369-RA	protein-coding	CG30369	-	O	CG30369-PA
42772	-1		CG10177	Dmel_CG10177	Dmel\CG10177	FLYBASE:FBgn0039083	3R	95A1-95A1	CG10177 gene product from transcript CG10177-RA	protein-coding	CG10177	-	O	CG10177-PA|MLCK-like
33829	-1		Vm26Aa	Dmel_CG9048	CG9048|Dmel\CG9048|TU-2|VM26A.1|VM26Aa|Vm26A|Vm26A.1|Vm26A1|sV17	FLYBASE:FBgn0003979	2L	26A3-26A3	Vitelline membrane 26Aa	protein-coding	Vm26Aa	Vitelline membrane 26Aa	O	CG9048-PA|CG9048-PB|Vm26Aa-PA|Vm26Aa-PB|vitelline membrane 26Aa
246550	-1		CG30340	Dmel_CG30340	BACR48G21.1|BG:BACR48G21.1|Dmel\CG30340	FLYBASE:FBgn0050340	2R	45F6-45F6	CG30340 gene product from transcript CG30340-RA	protein-coding	CG30340	-	O	CG30340-PA
3354971	-1		Set1	Dmel_CG40351	CG17395|CG17396|CG40351|Dmel\CG40351|aaf45425 Dm|dSet1|l(3)h5	FLYBASE:FBgn0040022	3LHet	-	CG40351 gene product from transcript CG40351-RF	protein-coding	Set1	-	O	CG40351-PA|CG40351-PB|CG40351-PC|CG40351-PD|CG40351-PE|CG40351-PF|CG40351-PG|CG40351-PH|CG40351-PI|Set1-PA|Set1-PB|Set1-PC|Set1-PD|Set1-PE|Set1-PF|Set1-PG|Set1-PH|Set1-PI|lethal 5
33937	-1		cort	Dmel_CG11330	CG11330|Cort|Dmel\CG11330|cor	FLYBASE:FBgn0000351	2L	26F7-26F7|2-49 cM	cortex	protein-coding	cort	cortex	O	CG11330-PA|CG11330-PB|cdc20-like|cort-PA|cort-PB
48632	-1		Act87E	Dmel_CG18290	Act87e|Actin|CG18290|Dmel\CG18290|E|act 87E|act87E|actin|mus87E	FLYBASE:FBgn0000046	3R	87E11-87E11	Actin 87E	protein-coding	Act87E	Actin 87E	O	Act87E-PA|Act87E-PB|CG18290-PA|CG18290-PB|actin|actin 87E|actin87E
43930	-1		prc	Dmel_CG5700	BEST:CK01593|CG5700|CK01593|Dmel\CG5700|EC11|Pc|Prc|pc	FLYBASE:FBgn0028573	3L	68E3-68E4	pericardin	protein-coding	prc	pericardin	O	CG5700-PB|prc-PB
42232	-1		CG14304	Dmel_CG14304	Dmel\CG14304	FLYBASE:FBgn0038629	3R	91B5-91B6	CG14304 gene product from transcript CG14304-RA	protein-coding	CG14304	-	O	CG14304-PA|CG14304-PB|CG14304-PC
36205	-1		CG42336	Dmel_CG42336	BcDNA:AT13707|CG13210|CG13211|Dmel\CG42336|Dmel_CG13210|Dmel_CG13211	FLYBASE:FBgn0259238	2R	47F1-47F1	CG42336 gene product from transcript CG42336-RB	protein-coding	CG42336	-	O	CG42336-PB|CG42336-PC|CG42336-PD|CG42336-PE|CG42336-PF
35597	-1		CG9447	Dmel_CG9447	Dmel\CG9447	FLYBASE:FBgn0033110	2R	42D6-42D6	CG9447 gene product from transcript CG9447-RC	protein-coding	CG9447	-	O	CG9447-PC
37220	-1		CG9975	Dmel_CG9975	Dmel\CG9975	FLYBASE:FBgn0034435	2R	56D1-56D1	CG9975 gene product from transcript CG9975-RA	protein-coding	CG9975	-	O	CG9975-PA|CG9975-PB
32144	-1		CG1847	Dmel_CG1847	Dmel\CG1847	FLYBASE:FBgn0030345	X	10F2-10F2	CG1847 gene product from transcript CG1847-RA	protein-coding	CG1847	-	O	CG1847-PA|CG1847-PC
35936	-1		CG8046	Dmel_CG8046	Dmel\CG8046	FLYBASE:FBgn0033388	2R	45B1-45B1	CG8046 gene product from transcript CG8046-RA	protein-coding	CG8046	-	O	CG8046-PA|CG8046-PB
36644	-1		CG42254	Dmel_CG42254	CG12854|CR30478|Dmel\CG42254|Dmel_CG12854|Dmel_CR30478	FLYBASE:FBgn0259112	2R	51C2-51C2	CG42254 gene product from transcript CG42254-RD	protein-coding	CG42254	-	O	CG42254-PB|CG42254-PC|CG42254-PD|CR30478
43720	-1		CG1635	Dmel_CG1635	Dmel\CG1635	FLYBASE:FBgn0039854	3R	100C7-100C7	CG1635 gene product from transcript CG1635-RA	protein-coding	CG1635	-	O	CG1635-PA
34138	-1		CG7818	Dmel_CG7818	Dmel\CG7818	FLYBASE:FBgn0032016	2L	29A3-29A3	CG7818 gene product from transcript CG7818-RA	protein-coding	CG7818	-	O	CG7818-PA
38905	-1		mus301	Dmel_CG7972	CG7972|Dmel\CG7972|SpnC|anon-WO0118547.354|cg7972|mus(3)301|spn-C|spnC	FLYBASE:FBgn0002899	3L	66B8-66B8|3-23 cM	mutagen-sensitive 301	protein-coding	mus301	mutagen-sensitive 301	O	CG7972-PA|mus301-PA|spindel|spindle C|spindle-C
39411	-1		Obp69a	Dmel_CG10436	69a|CG10436|DmelObp69a|Dmel\CG10436|PB-PRP1|PBP1|PBPRP-1|Pbprp1|pbprp-1|pbprp1	FLYBASE:FBgn0011279	3L	69B4-69B4	Odorant-binding protein 69a	protein-coding	Obp69a	Odorant-binding protein 69a	O	CG10436-PA|Obp69a-PA|Pheromone-binding protein-related protein 1
31024	-1		tw	Dmel_CG12311	CG12311|DPOMT2|DmPOMT2|Dmel\CG12311|EG:34F3.7|POMT2|Pomt2|dPOMT2	FLYBASE:FBgn0086368	X	1C4-1D4|1-0.4 cM	Protein O-mannosyltransferase 2	protein-coding	tw	Protein O-mannosyltransferase 2	O	CG12311-PA|CG12311-PB|protein O-mannosyltransferase 2|tricky-dickey|tw-PA|tw-PB|twisted
34289	-1		CG13117	Dmel_CG13117	BcDNA:SD27505|Dmel\CG13117	FLYBASE:FBgn0032140	2L	30C6-30C6	CG13117 gene product from transcript CG13117-RB	protein-coding	CG13117	-	O	CG13117-PA|CG13117-PB
32533	-1		CG15602	Dmel_CG15602	Dmel\CG15602	FLYBASE:FBgn0030694	X	13F1-13F1	CG15602 gene product from transcript CG15602-RA	protein-coding	CG15602	-	O	CG15602-PA
40537	-1		TwdlV	Dmel_CG14640	CG14640|Dmel\CG14640	FLYBASE:FBgn0037227	3R	82A1-82A1	TweedleV	protein-coding	TwdlV	TweedleV	O	CG14640-PA|TwdlV-PA
261616	-1		CG31778	Dmel_CG31778	BcDNA:HL03084|Dmel\CG31778	FLYBASE:FBgn0051778	2L	24C1-24C1	CG31778 gene product from transcript CG31778-RA	protein-coding	CG31778	-	O	CG31778-PA
43791	-1		lgs	Dmel_CG2041	BCL9|CG2041|Dm Lgs|Dmel\CG2041|Lgl|Lgs	FLYBASE:FBgn0039907	4	102B8-102C1	legless	protein-coding	lgs	legless	O	CG2041-PA|lgs-PA
32941	-1		CoRest	Dmel_CG42687	BcDNA:GH01486|BcDNA:LD11215|CG32534|CG32535|CG33525|CG3878|CG42687|CoREST|Dmel\CG42687|Dmel_CG32534|Dmel_CG33525|dCoREST|i169	FLYBASE:FBgn0261573	X	18C8-18C8	CG42687 gene product from transcript CG42687-RC	protein-coding	CoRest	-	O	CG42687-PA|CG42687-PC|CG42687-PD|CG42687-PE|CG42687-PF|CG42687-PG|CG42687-PH|CG42687-PI|CG42687-PJ|CG42687-PK|CoRest-PA|CoRest-PC|CoRest-PD|CoRest-PE|CoRest-PF|CoRest-PG|CoRest-PH|CoRest-PI|CoRest-PJ|CoRest-PK
43210	-1		TwdlD	Dmel_CG14243	CG14243|Dmel\CG14243	FLYBASE:FBgn0039444	3R	97C3-97C3	TweedleD	protein-coding	TwdlD	TweedleD	O	CG14243-PA|TwdlD-PA
5740498	-1		CG34202	Dmel_CG34202	Dmel\CG34202	FLYBASE:FBgn0085231	2R	57B2-57B2	CG34202 gene product from transcript CG34202-RA	protein-coding	CG34202	-	O	CG34202-PA
37123	-1		Prp19	Dmel_CG5519	BcDNA:LD02793|CG5519|Dmel\CG5519|GPB|Gbp|l(2)07838|prp19	FLYBASE:FBgn0261119	2R	55D1-55C9	CG5519 gene product from transcript CG5519-RA	protein-coding	Prp19	-	O	CG5519-PA|GTP-binding regulatory protein beta chain|Prp19-PA
7354427	-1		CG42287	Dmel_CG42287	CG13353|Dmel\CG42287|Dmel_CG13353	FLYBASE:FBgn0259183	2R	50D5-50D5	CG42287 gene product from transcript CG42287-RA	protein-coding	CG42287	-	O	CG42287-PA
37825	-1		CG3860	Dmel_CG3860	Dmel\CG3860	FLYBASE:FBgn0034951	2R	60B1-60B1	CG3860 gene product from transcript CG3860-RA	protein-coding	CG3860	-	O	CG3860-PA
35445	-1		CG1832	Dmel_CG1832	Dmel\CG1832	FLYBASE:FBgn0032979	2L	40F2-40F2	CG1832 gene product from transcript CG1832-RB	protein-coding	CG1832	-	O	CG1832-PA|CG1832-PB
36961	-1		mthl3	Dmel_CG6530	104/8|BEST:GM02553|CG6530|Dmel\CG6530|GENE 1|Mth-3|anon-WO0170980.52|anon-WO0170980.53|gene 1|l(2)k10408|mthl-3	FLYBASE:FBgn0028956	2R	54B16-54B16	methuselah-like 3	protein-coding	mthl3	methuselah-like 3	O	CG6530-PA|Mth-like 3|mthl3-PA
37138	-1		CG5327	Dmel_CG5327	Dmel\CG5327|NEST:bs33e07	FLYBASE:FBgn0034363	2R	55E2-55E2	CG5327 gene product from transcript CG5327-RA	protein-coding	CG5327	-	O	CG5327-PA
34620	-1		CG6785	Dmel_CG6785	Dmel\CG6785|cg6785	FLYBASE:FBgn0032399	2L	33B10-33B11	CG6785 gene product from transcript CG6785-RA	protein-coding	CG6785	-	O	CG6785-PA
39686	-1		CG6498	Dmel_CG6498	Dmel\CG6498|MAST 205|MAST205	FLYBASE:FBgn0036511	3L	71E1-71E1	CG6498 gene product from transcript CG6498-RB	protein-coding	CG6498	-	O	CG6498-PA|CG6498-PB
35122	-1		CG10336	Dmel_CG10336	Dmel\CG10336	FLYBASE:FBgn0032698	2L	37A1-37A1	CG10336 gene product from transcript CG10336-RC	protein-coding	CG10336	-	O	CG10336-PA|CG10336-PC
35425	-1		step	Dmel_CG11628	CG11628|CG11633|CYH1|Dmel\CG11628|GPH|GRP1|GRP1/cytohesin 1|Grp1|cytohesin/GRP1|l(2)SH0323|l(2)SH2 0323|l(2)k08110|stepk	FLYBASE:FBgn0086779	2L	40A1-39F3	steppke	protein-coding	step	steppke	O	CG11628-PA|CG11628-PC|CG11628-PD|CG11628-PE|general receptor for phosphoinositides 1|general receptor for phosphoinositides-1|lethal (2) SH0323|lethal (2) k08110|step-PA|step-PC|step-PD|step-PE
53554	-1		krz	Dmel_CG1487	0952/14|CG1487|Dmel\CG1487|Krz|Kurz|l(3)S095214	FLYBASE:FBgn0040206	3R	100E3-100E3	kurtz	protein-coding	krz	kurtz	O	CG1487-PA|CG1487-PB|krz-PA|krz-PB|kurtz-arrestin
34764	-1		CG42810	Dmel_CG42810	CG16849|Dmel\CG42810|Dmel_CG16849	FLYBASE:FBgn0261992	2L	34C1-34C1	CG42810 gene product from transcript CG42810-RA	protein-coding	CG42810	-	O	CG42810-PA
41309	-1		SelR	Dmel_CG6584	BcDNA:RE36040|BcDNA:RH61230|CG6584|Dmel\CG6584|MsrB|dMsrB|selR	FLYBASE:FBgn0037847	3R	86C7-86C7	CG6584 gene product from transcript CG6584-RI	protein-coding	SelR	-	O	CG6584-PA|CG6584-PB|CG6584-PC|CG6584-PE|CG6584-PG|CG6584-PH|CG6584-PI|CG6584-PJ|SelR-PA|SelR-PB|SelR-PC|SelR-PE|SelR-PG|SelR-PH|SelR-PI|SelR-PJ|methionine-R-sulfoxide reductase
35599	-1		Spn42Db	Dmel_CG9454	CG9454|Dmel\CG9454	FLYBASE:FBgn0033112	2R	42D6-42D6	Serpin 42Db	protein-coding	Spn42Db	Serpin 42Db	O	CG9454-PC|CG9454-PD|Spn42Db-PC|Spn42Db-PD|serpin 42Db
42548	-1		CG15498	Dmel_CG15498	Dmel\CG15498	FLYBASE:FBgn0038892	3R	93E4-93E4	CG15498 gene product from transcript CG15498-RA	protein-coding	CG15498	-	O	CG15498-PA
41058	-1		CG9821	Dmel_CG9821	CG31442|Dmel\CG9821|Ov29|anon-WO0118547.399|anon-WO0118547.424	FLYBASE:FBgn0037636	3R	85B2-85B2	CG9821 gene product from transcript CG9821-RC	protein-coding	CG9821	-	O	CG9821-PA|CG9821-PB|CG9821-PC|CG9821-PD
40293	-1		Pex16	Dmel_CG3947	CG3947|DmelPex16|Dmel\CG3947|pex16	FLYBASE:FBgn0037019	3L	77E6-77E6	Peroxin 16	protein-coding	Pex16	Peroxin 16	O	CG3947-PA|Pex16-PA|peroxin 16
31052	-1		CDC45L	Dmel_CG3658	CDC45|CG3658|Cdc45|D|DmCdc45|Dmel\CG3658|EG:BACR7A4.11|anon-1Ec|cdc45|dCDC45	FLYBASE:FBgn0026143	X	1E1-1E1	CG3658 gene product from transcript CG3658-RA	protein-coding	CDC45L	-	O	CDC45L-PA|CG3658-PA|transcription unit D
32361	-1		CG1368	Dmel_CG1368	Dmel\CG1368	FLYBASE:FBgn0030539	X	12E2-12E2	CG1368 gene product from transcript CG1368-RA	protein-coding	CG1368	-	O	CG1368-PA
36300	-1		CG13178	Dmel_CG13178	Dmel\CG13178	FLYBASE:FBgn0033685	2R	48E2-48E2	CG13178 gene product from transcript CG13178-RA	protein-coding	CG13178	-	O	CG13178-PA
36614	-1		ttv	Dmel_CG10117	CG10117|DEXT1|Dmel\CG10117|Ext1|P1.15|Ttv|l(2)00681|l(2)05282|l(2)k00115|l(2)k03617	FLYBASE:FBgn0020245	2R	51A7-51B4	tout-velu	protein-coding	ttv	tout-velu	O	CG10117-PA|CG10117-PB|CG10117-PC|tout velu|toutvelu|ttv-PA|ttv-PB|ttv-PC
42390	-1		CG4424	Dmel_CG4424	Dmel\CG4424	FLYBASE:FBgn0038765	3R	92C1-92C1	CG4424 gene product from transcript CG4424-RA	protein-coding	CG4424	-	O	CG4424-PA
38888	-1		CG8209	Dmel_CG8209	Dmel\CG8209|anon-WO0172774.138	FLYBASE:FBgn0035830	3L	66A21-66A21	CG8209 gene product from transcript CG8209-RA	protein-coding	CG8209	-	O	CG8209-PA|UBA/UBX 33.3 kDa protein like
46078	-1		vlc	Dmel_CG8390	CG8390|Dmel\CG8390|X|anon-41Fa|anon-WO0118547.98|l(2)07022	FLYBASE:FBgn0259978	2R	41F9-41F8	vulcan	protein-coding	vlc	vulcan	O	CG8390-PA|CG8390-PB|CG8390-PC|CG8390-PE|CG8390-PF|CG8390-PG|CG8390-PH|CG8390-PI|anon-41Fa|transcription unit X|vlc-PA|vlc-PB|vlc-PC|vlc-PE|vlc-PF|vlc-PG|vlc-PH|vlc-PI
35952	-1		CG2063	Dmel_CG2063	Dmel\CG2063	FLYBASE:FBgn0033400	2R	45C1-45C1	CG2063 gene product from transcript CG2063-RA	protein-coding	CG2063	-	O	CG2063-PA
38771	-1		CG8641	Dmel_CG8641	Dmel\CG8641	FLYBASE:FBgn0035733	3L	65E2-65E3	CG8641 gene product from transcript CG8641-RB	protein-coding	CG8641	-	O	CG8641-PA|CG8641-PB
44783	-1		RpL37A	Dmel_CG5827	BcDNA:RE23595|BcDNA:RH41593|CG5827|DmL37a|Dmel\CG5827|L37A|M(2)25C|M(2)S1|RpL37a|l(2)25Cb	FLYBASE:FBgn0261608	2L	25C4-25C4|2-15.0 cM	Ribosomal protein L37A	protein-coding	RpL37A	Ribosomal protein L37A	O	CG5827-PA|CG5827-PB|CG5827-PC|RpL37A-PA|RpL37A-PB|RpL37A-PC|minute (2) 25C|ribosomal protein L37A|ribosomal protein L37a
35147	-1		tup	Dmel_CG10619	CG10619|Dmel\CG10619|Isl|Tup|isl|islet|l(2)37Aa|l(2)E41	FLYBASE:FBgn0003896	2L	37B1-37B1|2-53.9 cM	tailup	protein-coding	tup	tailup	O	CG10619-PA|CG10619-PB|dIslet|islet|islet 1|lethal(2)37Aa|tailup/islet|tup-PA|tup-PB
47729	-1		CG16833	Dmel_CG16833	BEST:LD13681|Dmel\CG16833|LD13681	FLYBASE:FBgn0026147	2L	32C1-32C1	CG16833 gene product from transcript CG16833-RG	protein-coding	CG16833	-	O	CG16833-PD|CG16833-PE|CG16833-PF|CG16833-PG|CG16833-PH|CG16833-PI|CG16833-PJ|CG16833-PK|CG16833-PL|CG16833-PM|CG16833-PN
53428	-1		wds	Dmel_CG17437	CG17437|Dmel\CG17437|EG:BACR25B3.7|WDR5|WDS|Wds|l(1)16-94|l(1)3Ad|l(1)G0251|l(1)zw8|zw-8|zw8	FLYBASE:FBgn0040066	X	3A6-3A6|1-1.2 cM	will die slowly	protein-coding	wds	will die slowly	O	CG17437-PA|CG17437-PB|lethal(1)3Ad|wds-PA|wds-PB
5740518	-1		CG40968	Dmel_CG40968	Dmel\CG40968	FLYBASE:FBgn0085546	un	-	CG40968 gene product from transcript CG40968-RB	protein-coding	CG40968	-	O	CG40968-PB
39986	-1		CG5567	Dmel_CG5567	Dmel\CG5567|Phos5567	FLYBASE:FBgn0036760	3L	75A4-75A4	CG5567 gene product from transcript CG5567-RA	protein-coding	CG5567	-	O	CG5567-PA
38174	-1		cue	Dmel_CG12086	CG12086|CT5570|Dmel\CG12086|ms(3)02509	FLYBASE:FBgn0011204	3L	62A3-62A3	cueball	protein-coding	cue	cueball	O	CG12086-PA|cue-PA
34947	-1		beat-Ia	Dmel_CG4846	BG:DS00913.3|Beat Ia|CCT|CG4846|CT15567|Cct|Dmel\CG4846|TRiC|beat|beat Ia|beat1a|l(2)35Ea|l(2)35Eb|l(2)br47|l(2)br48|tric	FLYBASE:FBgn0013433	2L	35E2-35E2	beaten path Ia	protein-coding	beat-Ia	beaten path Ia	O	CG4846-PA|beat-Ia-PA|beaten path|chaperonin containing TCP-1|triclops
47763	-1		Abd-B	Dmel_CG11648	9|ABD-B|ABDB|Abd B|Abd-b|Abd0B|AbdB|AbdB(CA)[[26]]|AbdB-I|AbdB-II|Abdb|AdbB|BX-C|CG10291|CG11648|DROABDB|DmAbdB|Dmel\CG11648|Droabdb|FAB|Fab-6|Fab-7|Fab-8|Fab7|IAB 5|IAB5|IAB8|Iab-7|MCP|Mc|Mcp|Sab|Tab|Uab-5[Sab]|abd-B|abdB|bex|iab|iab-5|iab-6|iab-7|iab-8|iab5|iab6|iab7|iab8|iab8.9|iab9|l(3)89Ed|pH189|tuh-3|twig	FLYBASE:FBgn0000015	3R	89E4-89E5|3-58.8 cM	Abdominal B	protein-coding	Abd-B	Abdominal B	O	Abd-B-PA|Abd-B-PB|Abd-B-PC|Abd-B-PD|Abd-B-PE|Abd-B-PF|Abdominal-B|AbdominalB|CG11648-PA|CG11648-PB|CG11648-PC|CG11648-PD|CG11648-PE|CG11648-PF|abdominal B|abdominal-A|corset|infra-abdominal 5|infra-abdominal 6|infra-abdominal 7|infra-abdominal 8|infra-abdominal 9|infraabdominal|infraabdominal-8.9|male chauvinist pigmentation|microcephalus|miscadastral pigmentation|superabdominal|transabdominal
35655	-1		Gr43a	Dmel_CG1712	43C.1|43C1|CG1712|DmGr43a|Dmel\CG1712|GR43C.1|Gr43C1	FLYBASE:FBgn0041243	2R	43B2-43B2	Gustatory receptor 43a	protein-coding	Gr43a	Gustatory receptor 43a	O	CG1712-PA|CG1712-PB|Gr43a-PA|Gr43a-PB|gustatory receptor 43C.1|gustatory receptor 43a
3771966	-1		CG9960	Dmel_CG9960	CG32951|Dmel\CG9960|Dromel_CG9960_CG9958_FBtr007773_snapin_mORF	FLYBASE:FBgn0031454	2L	23A3-23A3	CG9960 gene product from transcript CG9960-RA	protein-coding	CG9960	-	O	CG9960-PA
7354465	-1		CG42232	Dmel_CG42232	CG14896|CG14897|Dmel\CG42232|Dmel_CG14896|Dmel_CG14897|anon-EST:Liang-1.14|clone 1.14	FLYBASE:FBgn0250754	3R	89B17-89B17	CG42232 gene product from transcript CG42232-RB	protein-coding	CG42232	-	O	CG42232-PB
3771834	-1		5SrRNA:CR33434	Dmel_CR33434	CR33434|Dmel\CR33434	FLYBASE:FBgn0053434	2R	56E2-56E2	5S ribosomal RNA	rRNA	5SrRNA:CR33434	-	O	-
35251	-1		CG13078	Dmel_CG13078	Dmel\CG13078	FLYBASE:FBgn0032809	2L	37F1-37F1	CG13078 gene product from transcript CG13078-RA	protein-coding	CG13078	-	O	CG13078-PA
3885567	-1		Dyrk3	Dmel_CG40478	BcDNA:RE60792|CG40478|DDYRK3|DYRK3|Dm3|Dmel\CG40478	FLYBASE:FBgn0027101	4	102F8-102F8	CG40478 gene product from transcript CG40478-RE	protein-coding	Dyrk3	-	O	CG40478-PA|CG40478-PC|CG40478-PE|Dyrk3-PA|Dyrk3-PC|Dyrk3-PE|unknown-telomeric-protein-gene
32666	-1		CG4768	Dmel_CG4768	Dmel\CG4768	FLYBASE:FBgn0030790	X	15A8-15A8	CG4768 gene product from transcript CG4768-RB	protein-coding	CG4768	-	O	CG4768-PA|CG4768-PB
40038	-1		CG6893	Dmel_CG6893	Dmel\CG6893	FLYBASE:FBgn0036807	3L	75D6-75D6	CG6893 gene product from transcript CG6893-RB	protein-coding	CG6893	-	O	CG6893-PB
40924	-1		CG2993	Dmel_CG2993	Dmel\CG2993	FLYBASE:FBgn0037521	3R	84E1-84E1	CG2993 gene product from transcript CG2993-RB	protein-coding	CG2993	-	O	CG2993-PA|CG2993-PB|CG2993-PC
42955	-1		CG6980	Dmel_CG6980	Dmel\CG6980|anon-WO0140519.171	FLYBASE:FBgn0039228	3R	96A23-96A23	CG6980 gene product from transcript CG6980-RA	protein-coding	CG6980	-	O	CG6980-PA
47186	-1		mus205	Dmel_CG1925	154926_at|AAF59191|CG1925|DhRev3|DmREV3|Dmel\CG1925|Dmpolzeta|Mus205|mus 205|mus(2)205|mus-205|rev3	FLYBASE:FBgn0002891	2R	43E17-43E17|2-54.9 cM	mutagen-sensitive 205	protein-coding	mus205	mutagen-sensitive 205	O	CG1925-PA|mus205-PA
5740653	-1		kl-3	Dmel_CG17629	CG17629|CG40443|Dmel\CG17629|Lms3|Y104b|kl-4|kl3|ms(Y)104b	FLYBASE:FBgn0001314	YHet	h8-h8	male fertility factor kl3	protein-coding	kl-3	male fertility factor kl3	O	CG17629-PA|gamma-dynein heavy chain|kl-3-PA
43121	-1		CG43121	Dmel_CG43121	Dmel\CG43121	FLYBASE:FBgn0262581	3L	70E7-70E7	CG43121 gene product from transcript CG43121-RA	protein-coding	CG43121	-	O	CG43121-PA
44750	-1		Ady43A	Dmel_CG1851	Adk43A|Ady|CG1851|Dmel\CG1851|ady43A	FLYBASE:FBgn0026602	2R	43A1-43A2	CG1851 gene product from transcript CG1851-RA	protein-coding	Ady43A	-	O	Ady43A-PA|CG1851-PA
35292	-1		pr	Dmel_CG16784	38B.9|CG16784|Dmel\CG16784|anon-38Bb	FLYBASE:FBgn0003141	2L	38B3-38B3|2-54.5 cM	purple	protein-coding	pr	purple	O	CG16784-PC|pr-PC
34467	-1		CG17107	Dmel_CG17107	Dmel\CG17107	FLYBASE:FBgn0032281	2L	32A4-32A4	CG17107 gene product from transcript CG17107-RB	protein-coding	CG17107	-	O	CG17107-PA|CG17107-PB|CG17107-PC
3772065	-1		CG33688	Dmel_CG33688	Dmel\CG33688	FLYBASE:FBgn0053688	3L	72D10-72D10	CG33688 gene product from transcript CG33688-RA	protein-coding	CG33688	-	O	CG33688-PA
32169	-1		Usp7	Dmel_CG1490	CG1490|Dmel\CG1490|USP7	FLYBASE:FBgn0030366	X	11A1-11A2	ubiquitin-specific protease 7	protein-coding	Usp7	ubiquitin-specific protease 7	O	CG1490-PB|Usp7-PB
41938	-1		Sap47	Dmel_CG8884	CG8884|Dmel\CG8884|SAP 47|SAP-47|SAP47|dsap-47|sap47	FLYBASE:FBgn0013334	3R	89A8-89A8	Synapse-associated protein 47kD	protein-coding	Sap47	Synapse-associated protein 47kD	O	CG8884-PA|CG8884-PB|CG8884-PC|CG8884-PD|CG8884-PE|CG8884-PF|CG8884-PG|CG8884-PI|CG8884-PJ|Sap47-PA|Sap47-PB|Sap47-PC|Sap47-PD|Sap47-PE|Sap47-PF|Sap47-PG|Sap47-PI|Sap47-PJ
35966	-1		wun	Dmel_CG8804	CG8804|Dmel\CG8804|LPP-like|Wun|Wunen|l(2)k16806	FLYBASE:FBgn0016078	2R	45D3-45D4	wunen	protein-coding	wun	wunen	O	CG8804-PA|CG8804-PB|CG8804-PC|wun-PA|wun-PB|wun-PC
40450	-1		CG7130	Dmel_CG7130	Dmel\CG7130	FLYBASE:FBgn0037151	3L	79B2-79B2	CG7130 gene product from transcript CG7130-RA	protein-coding	CG7130	-	O	CG7130-PA
39633	-1		CG18581	Dmel_CG18581	Dmel\CG18581	FLYBASE:FBgn0036466	3L	71B2-71B2	CG18581 gene product from transcript CG18581-RA	protein-coding	CG18581	-	O	CG18581-PA
40172	-1		Prp3	Dmel_CG7757	CG7757|Dmel\CG7757|PRPF3|dPrp3	FLYBASE:FBgn0036915	3L	76D4-76D4	Precursor RNA processing 3	protein-coding	Prp3	Precursor RNA processing 3	O	CG7757-PA|CG7757-PB|Prp3-PA|Prp3-PB|precursor RNA processing 3
48343	-1		deltaTry	Dmel_CG12351	CG12351|DmDeltaTry|Dmel\CG12351|delta	FLYBASE:FBgn0010358	2R	47F5-47F5	deltaTrypsin	protein-coding	deltaTry	deltaTrypsin	O	CG12351-PA|deltaTry-PA
40221	-1		Clc	Dmel_CG6948	CG6948|CLC|Dmel\CG6948|clc	FLYBASE:FBgn0024814	3L	77A3-77A4	Clathrin light chain	protein-coding	Clc	Clathrin light chain	O	CG6948-PA|CG6948-PB|CG6948-PC|CG6948-PD|Clc-PA|Clc-PB|Clc-PC|Clc-PD|clathrin|clathrin light chain|clathrin-light-chain
318795	-1		CG31551	Dmel_CG31551	CG11005|Dmel\CG31551	FLYBASE:FBgn0051551	3R	83B7-83B7	CG31551 gene product from transcript CG31551-RA	protein-coding	CG31551	-	O	CG31551-PA
34072	-1		CG14537	Dmel_CG14537	BcDNA:AT11469|Dmel\CG14537	FLYBASE:FBgn0031954	2L	28D2-28D2	CG14537 gene product from transcript CG14537-RA	protein-coding	CG14537	-	O	CG14537-PA
3771785	-1		His2A:CG33826	Dmel_CG33826	CG33826|Dmel\CG33826	FLYBASE:FBgn0053826	2L	39D5-39D5	CG33826 gene product from transcript CG33826-RA	protein-coding	His2A:CG33826	-	O	CG33826-PA|His2A:CG33826-PA|histone H2A
32889	-1		CG43759	Dmel_CG43759	CG12527|CG14188|CG32541|CG42506|Dmel\CG43759|Dmel_CG32541|Dmel_CG42506|EP(X)1644|LD15404	FLYBASE:FBgn0264090	X	17F3-18A2	CG43759 gene product from transcript CG43759-RC	protein-coding	CG43759	-	O	CG43759-PA|CG43759-PB|CG43759-PC
