# Supplementary material for: Machine Learning Analysis Identifies Drosophila Grunge/Atrophin as an Important Learning and Memory Gene Required for Memory Retention and Social Learning
Source: G3 (Bethesda). 2017 Sep 9;7(11):3705–18. doi: 10.1534/g3.117.300172 (PMC5677163; doi:10.1534/g3.117.300172)
Supplement: Supplementary file 11 [file 3705FileS2.xlsx]

## Sheet: Sheet1
Gene Name			Gene Score			Estimated Probability
Gug	Dmel_CG6964	0	0.599059	0.5	0	0.523283
gem	Dmel_CG30011	0	0.583578	0.5	0	0.506417
tws	Dmel_CG6235	0	0.580922	0.5	0	0.503521
Taf4	Dmel_CG5444	0	0.571693	0.5	0	0.493457
crol	Dmel_CG14938	0	0.571595	0.5	0	0.49335
Sap47	Dmel_CG8884	-1	0.570648	0.5	0	0.492318
CG14478	Dmel_CG14478	0	0.569926	0.5	0	0.49153
CG13624	Dmel_CG13624	0	0.562456	0.5	0	0.48339
Sdc	Dmel_CG10497	0	0.560679	0.5	0	0.481454
spen	Dmel_CG18497	0	0.559114	0.5	0	0.47975
l(3)82Fd	Dmel_CG32464	0	0.557465	0.5	0	0.477955
Atpalpha	Dmel_CG5670	0	0.555083	0.5	0	0.475363
Pde8	Dmel_CG5411	0	0.55315	0.5	0	0.473261
cora	Dmel_CG11949	0	0.551914	0.5	0	0.471917
Csk	Dmel_CG42317	0	0.550481	0.5	0	0.470359
Nrx-IV	Dmel_CG6827	0	0.547046	0.5	0	0.466628
crp	Dmel_CG7664	0	0.546285	0.5	0	0.465802
G-oalpha47A	Dmel_CG2204	0	0.539871	0.5	0	0.458847
flfl	Dmel_CG9351	0	0.537799	0.5	0	0.456604
larp	Dmel_CG42551	0	0.536314	0.5	0	0.454997
CG10011	Dmel_CG10011	0	0.536198	0.5	0	0.454872
sgg	Dmel_CG2621	0	0.535581	0.5	0	0.454204
CG6424	Dmel_CG6424	0	0.528647	0.5	0	0.446717
Pk61C	Dmel_CG1210	0	0.52833	0.5	0	0.446375
Unc-76	Dmel_CG3981	0	0.527828	0.5	0	0.445834
Src42A	Dmel_CG7873	0	0.526549	0.5	0	0.444456
shn	Dmel_CG7734	0	0.525456	0.5	0	0.443279
CG7337	Dmel_CG7337	0	0.524834	0.5	0	0.44261
Ank	Dmel_CG1651	0	0.52236	0.5	0	0.439949
Pkn	Dmel_CG2049	0	0.517688	0.5	0	0.434934
kis	Dmel_CG3696	0	0.517153	0.5	0	0.434361
emc	Dmel_CG1007	0	0.516889	0.5	0	0.434078
rhea	Dmel_CG6831	0	0.516686	0.5	0	0.43386
hipk	Dmel_CG17090	0	0.516569	0.5	0	0.433735
alpha-Adaptin	Dmel_CG4260	0	0.513529	0.5	0	0.430481
CG10077	Dmel_CG10077	0	0.51305	0.5	0	0.429969
14-3-3zeta	Dmel_CG17870	0	0.51103	0.5	0	0.42781
cals	Dmel_CG11059	0	0.510815	0.5	0	0.427581
Sur-8	Dmel_CG5407	0	0.508959	0.5	0	0.4256
Dsp1	Dmel_CG12223	0	0.508409	0.5	0	0.425014
klar	Dmel_CG17046	0	0.507159	0.5	0	0.423682
CaMKII	Dmel_CG18069	1	0.506636	0.5	0.0833333	0.423125
fwd	Dmel_CG7004	0	0.506516	0.5	0.0833333	0.422997
msn	Dmel_CG16973	0	0.505599	0.5	0.0833333	0.422021
Lis-1	Dmel_CG8440	0	0.505196	0.5	0.0833333	0.421593
CG5830	Dmel_CG5830	0	0.505176	0.5	0.0833333	0.421571
Lar	Dmel_CG10443	0	0.504957	0.5	0.0833333	0.421339
SRPK	Dmel_CG8174	0	0.504194	0.5	0.0833333	0.420527
Atg1	Dmel_CG10967	0	0.504159	0.5	0.0833333	0.42049
smi35A	Dmel_CG4551	0	0.502693	0.5	0.0833333	0.418933
Eip75B	Dmel_CG8127	0	0.499758	0.5	0.0833333	0.415819
Mkk4	Dmel_CG9738	0	0.498573	0.5	0.0833333	0.414564
dock	Dmel_CG3727	0	0.497863	0.5	0.0833333	0.413813
lqf	Dmel_CG8532	0	0.497505	0.5	0.0833333	0.413434
CG15609	Dmel_CG15609	0	0.496452	0.5	0.0833333	0.412321
fd68A	Dmel_CG11799	0	0.496259	0.5	0.0833333	0.412117
CG7029	Dmel_CG7029	0	0.496198	0.5	0.0833333	0.412052
Map205	Dmel_CG1483	0	0.495767	0.5	0.0833333	0.411597
RanBPM	Dmel_CG42236	0	0.49517	0.5	0.0833333	0.410966
PRL-1	Dmel_CG4993	0	0.494816	0.5	0.0833333	0.410592
gro	Dmel_CG8384	0	0.493337	0.5	0.0833333	0.409032
Sin3A	Dmel_CG8815	0	0.491544	0.5	0.0833333	0.407143
scyl	Dmel_CG7590	0	0.491169	0.5	0.0833333	0.406748
gw	Dmel_CG31992	0	0.491157	0.5	0.0833333	0.406735
CG4612	Dmel_CG4612	0	0.490174	0.5	0.0833333	0.405701
Khc-73	Dmel_CG8183	0	0.490008	0.5	0.0833333	0.405527
par-1	Dmel_CG8201	0	0.489803	0.5	0.0833333	0.405311
dlg1	Dmel_CG1725	0	0.48929	0.5	0.0833333	0.404772
CG42574	Dmel_CG42574	0	0.488207	0.5	0.0833333	0.403634
vsg	Dmel_CG16707	0	0.487786	0.5	0.0833333	0.403192
Hrb27C	Dmel_CG10377	0	0.486757	0.5	0.0833333	0.402112
Mbs	Dmel_CG32156	0	0.486207	0.5	0.0833333	0.401536
lola	Dmel_CG12052	0	0.486004	0.5	0.0833333	0.401323
jim	Dmel_CG11352	0	0.4858	0.5	0.0833333	0.401109
mub	Dmel_CG7437	0	0.485187	0.5	0.0833333	0.400467
Su(dx)	Dmel_CG4244	0	0.484822	0.5	0.0833333	0.400085
Asx	Dmel_CG8787	0	0.484277	0.5	0.0833333	0.399514
CycG	Dmel_CG11525	0	0.484269	0.5	0.0833333	0.399506
Rab8	Dmel_CG8287	0	0.483807	0.5	0.0833333	0.399023
Rab5	Dmel_CG3664	0	0.483069	0.5	0.0833333	0.398251
fs(1)h	Dmel_CG2252	0	0.482366	0.5	0.0833333	0.397516
Flo-2	Dmel_CG32593	0	0.482012	0.5	0.0833333	0.397147
CG3409	Dmel_CG3409	0	0.481747	0.5	0.0833333	0.39687
X11L	Dmel_CG5675	0	0.48063	0.5	0.0833333	0.395704
elav	Dmel_CG4262	0	0.480296	0.5	0.0833333	0.395356
nonA	Dmel_CG4211	0	0.48002	0.5	0.0833333	0.395068
pigs	Dmel_CG3973	0	0.479424	0.5	0.0833333	0.394447
CkIalpha	Dmel_CG2028	0	0.478765	0.5	0.0833333	0.39376
CG30497	Dmel_CG30497	0	0.47643	0.5	0.0833333	0.391332
Mo25	Dmel_CG4083	0	0.476154	0.5	0.0833333	0.391045
unc-104	Dmel_CG8566	0	0.476075	0.5	0.0833333	0.390963
shot	Dmel_CG18076	0	0.475848	0.5	0.0833333	0.390727
CG32758	Dmel_CG32758	0	0.475528	0.5	0.0833333	0.390395
Ten-m	Dmel_CG5723	0	0.475434	0.5	0.0833333	0.390297
Cdep	Dmel_CG31536	0	0.475145	0.5	0.0833333	0.389997
Sema-1b	Dmel_CG6446	0	0.475093	0.5	0.0833333	0.389943
Dyb	Dmel_CG8529	0	0.474891	0.5	0.0833333	0.389734
kuz	Dmel_CG7147	0	0.474606	0.5	0.0833333	0.389438
Tao-1	Dmel_CG14217	0	0.474494	0.5	0.0833333	0.389322
lgs	Dmel_CG2041	-1	0.47323	0.4	0.0833333	0.388012
Gprk2	Dmel_CG17998	0	0.472759	0.4	0.0833333	0.387524
Scm	Dmel_CG9495	0	0.472531	0.4	0.0833333	0.387288
NFAT	Dmel_CG11172	0	0.472466	0.4	0.0833333	0.387221
glec	Dmel_CG6575	0	0.472465	0.4	0.0833333	0.38722
mask	Dmel_CG33106	0	0.471383	0.4	0.0833333	0.386101
sty	Dmel_CG1921	0	0.471216	0.4	0.0833333	0.385928
Apc	Dmel_CG1451	0	0.471065	0.4	0.0833333	0.385772
Smox	Dmel_CG2262	0	0.471033	0.4	0.0833333	0.385739
RhoGEF2	Dmel_CG9635	0	0.470554	0.4	0.0833333	0.385244
vimar	Dmel_CG3572	0	0.47007	0.4	0.0833333	0.384744
CG10543	Dmel_CG10543	0	0.469055	0.4	0.0833333	0.383696
CaMKI	Dmel_CG1495	0	0.468703	0.4	0.0833333	0.383333
hrg	Dmel_CG9854	0	0.468549	0.4	0.0833333	0.383175
ewg	Dmel_CG3114	0	0.467225	0.4	0.0833333	0.38181
CG10277	Dmel_CG10277	0	0.466601	0.4	0.0833333	0.381168
dsd	Dmel_CG5634	0	0.466481	0.4	0.0833333	0.381045
beta-Spec	Dmel_CG5870	0	0.466353	0.4	0.0833333	0.380913
zfh2	Dmel_CG1449	0	0.465688	0.4	0.0833333	0.380229
nuf	Dmel_CG33991	0	0.465283	0.4	0.0833333	0.379813
lid	Dmel_CG9088	0	0.465054	0.4	0.0833333	0.379578
CG2991	Dmel_CG2991	0	0.464955	0.4	0.0833333	0.379476
trbd	Dmel_CG9448	0	0.464068	0.4	0.0833333	0.378565
cwo	Dmel_CG17100	0	0.463996	0.4	0.0833333	0.378492
flw	Dmel_CG2096	0	0.462793	0.4	0.0833333	0.377258
Gap1	Dmel_CG6721	0	0.46258	0.4	0.0833333	0.37704
Smr	Dmel_CG4013	0	0.462044	0.4	0.0833333	0.376491
CG31534	Dmel_CG31534	0	0.461877	0.4	0.0833333	0.37632
CG31224	Dmel_CG31224	0	0.461647	0.4	0.0833333	0.376084
Mnt	Dmel_CG13316	0	0.46097	0.4	0.0833333	0.375392
uzip	Dmel_CG3533	0	0.460715	0.4	0.0833333	0.375131
CG17724	Dmel_CG17724	0	0.460436	0.4	0.0833333	0.374846
tara	Dmel_CG6889	0	0.460309	0.4	0.0833333	0.374716
Csp	Dmel_CG6395	0	0.460298	0.4	0.0833333	0.374704
slim	Dmel_CG5186	0	0.459187	0.4	0.0833333	0.37357
CG2519	Dmel_CG2519	0	0.458811	0.4	0.0833333	0.373186
tgo	Dmel_CG11987	0	0.457549	0.4	0.0833333	0.371899
Dg	Dmel_CG18250	0	0.457361	0.4	0.0833333	0.371708
Caki	Dmel_CG6703	0	0.4568	0.4	0.0833333	0.371136
Su(z)2	Dmel_CG3905	0	0.456563	0.4	0.0833333	0.370895
gish	Dmel_CG6963	0	0.456449	0.4	0.0833333	0.370779
Ggamma1	Dmel_CG8261	0	0.455816	0.4	0.0833333	0.370135
krz	Dmel_CG1487	-1	0.455363	0.4	0.0833333	0.369674
ben	Dmel_CG18319	0	0.455035	0.4	0.0833333	0.369341
dbo	Dmel_CG6224	0	0.454965	0.4	0.0833333	0.36927
dally	Dmel_CG4974	0	0.454709	0.4	0.0833333	0.36901
CG4699	Dmel_CG4699	0	0.453106	0.4	0.0833333	0.367383
SCAR	Dmel_CG4636	0	0.452984	0.4	0.0833333	0.36726
how	Dmel_CG10293	0	0.452325	0.4	0.0833333	0.366592
Psi	Dmel_CG8912	0	0.452083	0.4	0.0833333	0.366347
CG32486	Dmel_CG32486	0	0.451102	0.4	0.0833333	0.365354
cindr	Dmel_CG31012	0	0.450947	0.4	0.0833333	0.365197
CG3638	Dmel_CG3638	0	0.450699	0.4	0.0833333	0.364947
Rho1	Dmel_CG8416	0	0.450198	0.4	0.0833333	0.36444
Nup153	Dmel_CG4453	0	0.450001	0.4	0.0833333	0.364241
Pp1-87B	Dmel_CG5650	0	0.449709	0.4	0.0833333	0.363946
mei-P26	Dmel_CG12218	0	0.449216	0.4	0.0833333	0.363449
RhoGAP93B	Dmel_CG3421	0	0.448037	0.4	0.0833333	0.36226
msps	Dmel_CG5000	0	0.44771	0.4	0.0833333	0.36193
sima	Dmel_CG7951	0	0.44767	0.4	0.0833333	0.36189
sno	Dmel_CG1903	0	0.447262	0.4	0.0833333	0.361479
egh	Dmel_CG9659	0	0.447094	0.4	0.0833333	0.36131
trx	Dmel_CG8651	0	0.446868	0.4	0.0833333	0.361082
Thd1	Dmel_CG1981	0	0.446585	0.4	0.0833333	0.360798
AGO1	Dmel_CG6671	0	0.446441	0.4	0.0833333	0.360653
Unr	Dmel_CG7015	0	0.44629	0.4	0.0833333	0.360501
CG8683	Dmel_CG8683	0	0.446222	0.4	0.0833333	0.360433
zip	Dmel_CG15792	0	0.445678	0.4	0.0833333	0.359886
tacc	Dmel_CG9765	0	0.445282	0.4	0.0833333	0.359488
JIL-1	Dmel_CG6297	0	0.445098	0.4	0.0833333	0.359303
ClC-c	Dmel_CG5284	0	0.444656	0.4	0.0833333	0.358859
sqd	Dmel_CG16901	0	0.444542	0.4	0.0833333	0.358745
Pde11	Dmel_CG34341	0	0.444508	0.4	0.0833333	0.358711
Ric	Dmel_CG8418	0	0.444462	0.4	0.0833333	0.358665
pan	Dmel_CG34403	0	0.444331	0.4	0.0833333	0.358533
InR	Dmel_CG18402	0	0.444202	0.4	0.0833333	0.358404
Pkc98E	Dmel_CG1954	0	0.443728	0.4	0.0833333	0.357929
Spred	Dmel_CG10155	0	0.442872	0.4	0.0833333	0.357071
Sap-r	Dmel_CG12070	0	0.442855	0.4	0.0833333	0.357054
unk	Dmel_CG4620	0	0.442541	0.4	0.0833333	0.356739
unc-13	Dmel_CG2999	-1	0.442133	0.4	0.0833333	0.356331
CG10289	Dmel_CG10289	0	0.4421	0.4	0.0833333	0.356298
CG14073	Dmel_CG14073	0	0.441944	0.4	0.0833333	0.356142
CG10082	Dmel_CG10082	0	0.441529	0.4	0.0833333	0.355727
Vap-33-1	Dmel_CG5014	0	0.441465	0.4	0.0833333	0.355663
cenG1A	Dmel_CG31811	0	0.441369	0.4	0.0833333	0.355567
hep	Dmel_CG4353	0	0.440989	0.4	0.0833333	0.355187
pgant5	Dmel_CG31651	0	0.44051	0.4	0.0833333	0.354709
mura	Dmel_CG9381	0	0.440267	0.4	0.0833333	0.354466
pAbp	Dmel_CG5119	0	0.438697	0.4	0.0833333	0.352901
Fps85D	Dmel_CG8874	0	0.438563	0.4	0.0833333	0.352767
aPKC	Dmel_CG42783	0	0.437991	0.4	0.0833333	0.352198
hppy	Dmel_CG7097	0	0.437852	0.4	0.0833333	0.35206
mew	Dmel_CG1771	0	0.436862	0.4	0.0833333	0.351075
Mob2	Dmel_CG11711	0	0.436827	0.4	0.0833333	0.35104
pod1	Dmel_CG4532	0	0.436779	0.4	0.0833333	0.350993
noc	Dmel_CG4491	0	0.436763	0.4	0.0833333	0.350977
Kr-h1	Dmel_CG18783	0	0.436495	0.4	0.0833333	0.350711
Amun	Dmel_CG2446	0	0.435663	0.4	0.0833333	0.349885
Cka	Dmel_CG7392	0	0.435486	0.4	0.0833333	0.349709
CdsA	Dmel_CG7962	0	0.435239	0.4	0.0833333	0.349464
CG31122	Dmel_CG31122	0	0.434872	0.4	0.0833333	0.3491
CG1347	Dmel_CG1347	0	0.434671	0.4	0.0833333	0.348901
Akt1	Dmel_CG4006	1	0.434322	0.4	0.166667	0.348555
Nedd4	Dmel_CG42279	0	0.434044	0.4	0.166667	0.34828
Marf	Dmel_CG3869	0	0.43369	0.4	0.166667	0.347929
CG14619	Dmel_CG14619	0	0.433172	0.4	0.166667	0.347417
enc	Dmel_CG10847	0	0.43288	0.4	0.166667	0.347128
Asator	Dmel_CG11533	0	0.43199	0.4	0.166667	0.346249
ari-1	Dmel_CG5659	0	0.431815	0.4	0.166667	0.346076
CG6700	Dmel_CG6700	0	0.431324	0.4	0.166667	0.345592
prominin-like	Dmel_CG7740	0	0.431078	0.4	0.166667	0.345349
CG9932	Dmel_CG9932	0	0.430622	0.4	0.166667	0.344899
rin	Dmel_CG9412	0	0.430426	0.4	0.166667	0.344706
Tsp96F	Dmel_CG6120	0	0.430182	0.4	0.166667	0.344466
Atx2	Dmel_CG5166	0	0.430065	0.4	0.166667	0.344351
PMCA	Dmel_CG42314	0	0.429839	0.4	0.166667	0.344128
Smg5	Dmel_CG8954	0	0.429777	0.4	0.166667	0.344067
tmod	Dmel_CG1539	0	0.429466	0.4	0.166667	0.343761
Lnk	Dmel_CG17367	0	0.429191	0.4	0.166667	0.34349
CG16953	Dmel_CG16953	0	0.428844	0.4	0.166667	0.343149
Mef2	Dmel_CG1429	0	0.428821	0.4	0.166667	0.343127
drpr	Dmel_CG2086	0	0.428629	0.4	0.166667	0.342938
CHES-1-like	Dmel_CG12690	0	0.428609	0.4	0.166667	0.342918
drk	Dmel_CG6033	0	0.428555	0.4	0.166667	0.342865
Cont	Dmel_CG1084	0	0.428086	0.4	0.166667	0.342404
fl(2)d	Dmel_CG6315	0	0.427926	0.4	0.166667	0.342247
trio	Dmel_CG18214	0	0.427571	0.4	0.166667	0.341899
cpo	Dmel_CG31243	0	0.427261	0.4	0.166667	0.341595
CG9821	Dmel_CG9821	-1	0.427168	0.4	0.166667	0.341503
CG9674	Dmel_CG9674	0	0.427014	0.4	0.166667	0.341352
ttk	Dmel_CG1856	0	0.426535	0.4	0.166667	0.340883
CG12424	Dmel_CG12424	0	0.426288	0.4	0.166667	0.340641
fbl6	Dmel_CG13213	0	0.425791	0.4	0.166667	0.340154
tud	Dmel_CG9450	0	0.425581	0.4	0.166667	0.339948
hkl	Dmel_CG10473	0	0.425243	0.4	0.166667	0.339617
Chc	Dmel_CG9012	0	0.425106	0.4	0.166667	0.339483
baz	Dmel_CG5055	0	0.424513	0.4	0.166667	0.338904
CG5059	Dmel_CG5059	0	0.424268	0.4	0.166667	0.338664
CG14767	Dmel_CG14767	0	0.422829	0.4	0.166667	0.33726
osa	Dmel_CG7467	0	0.422735	0.4	0.166667	0.337168
cic	Dmel_CG5067	0	0.422638	0.4	0.166667	0.337074
Acsl	Dmel_CG8732	0	0.422135	0.4	0.166667	0.336584
hth	Dmel_CG17117	0	0.422055	0.4	0.166667	0.336506
Hex-A	Dmel_CG3001	0	0.422053	0.4	0.166667	0.336504
ex	Dmel_CG4114	0	0.422013	0.4	0.166667	0.336465
Fim	Dmel_CG8649	0	0.42188	0.4	0.166667	0.336335
Stam	Dmel_CG6521	0	0.421738	0.4	0.166667	0.336197
CG10641	Dmel_CG10641	0	0.421726	0.4	0.166667	0.336185
Pur-alpha	Dmel_CG1507	0	0.421701	0.4	0.166667	0.336161
nocte	Dmel_CG17255	0	0.421523	0.4	0.166667	0.335988
Pka-C1	Dmel_CG4379	0	0.421452	0.4	0.166667	0.335919
SoxN	Dmel_CG18024	0	0.42133	0.4	0.166667	0.3358
CG11727	Dmel_CG11727	0	0.420276	0.4	0.166667	0.334775
osp	Dmel_CG3479	0	0.420243	0.4	0.166667	0.334743
Plc21C	Dmel_CG4574	0	0.420219	0.4	0.166667	0.33472
ens	Dmel_CG14998	0	0.419815	0.4	0.166667	0.334328
GATAd	Dmel_CG5034	0	0.419644	0.4	0.166667	0.334162
tomosyn	Dmel_CG17762	0	0.419376	0.4	0.166667	0.333902
slmb	Dmel_CG3412	0	0.419354	0.4	0.166667	0.33388
Wnk	Dmel_CG7177	0	0.419102	0.4	0.166667	0.333636
Rbcn-3B	Dmel_CG17766	0	0.418845	0.4	0.166667	0.333387
wge	Dmel_CG31151	0	0.418684	0.4	0.166667	0.33323
dco	Dmel_CG2048	0	0.41866	0.4	0.166667	0.333207
LIMK1	Dmel_CG1848	0	0.417482	0.4	0.166667	0.332067
Cam	Dmel_CG8472	0	0.41715	0.4	0.166667	0.331745
l(2)s5379	Dmel_CG7085	0	0.416916	0.4	0.166667	0.331519
shi	Dmel_CG18102	1	0.41683	0.4	0.25	0.331436
yps	Dmel_CG5654	0	0.416809	0.4	0.25	0.331416
Akap200	Dmel_CG13388	0	0.415842	0.4	0.25	0.330482
Pli	Dmel_CG5212	0	0.415686	0.4	0.25	0.330331
CG3056	Dmel_CG3056	0	0.414888	0.4	0.25	0.329562
CG31352	Dmel_CG31352	0	0.414686	0.4	0.25	0.329367
l(2)NC136	Dmel_CG8426	0	0.41416	0.4	0.25	0.32886
emb	Dmel_CG13387	0	0.413781	0.4	0.25	0.328496
Fas1	Dmel_CG6588	0	0.41315	0.4	0.25	0.327889
CG8184	Dmel_CG8184	0	0.4127	0.4	0.25	0.327456
kug	Dmel_CG7749	0	0.412575	0.4	0.25	0.327336
Hr39	Dmel_CG8676	0	0.41238	0.4	0.25	0.327149
myoglianin	Dmel_CG1838	0	0.412367	0.4	0.25	0.327136
CG1317	Dmel_CG1317	0	0.412014	0.4	0.25	0.326798
Lk6	Dmel_CG17342	0	0.411619	0.4	0.25	0.326419
CG5794	Dmel_CG5794	0	0.411586	0.4	0.25	0.326387
fdl	Dmel_CG8824	0	0.411547	0.4	0.25	0.32635
tay	Dmel_CG9056	0	0.411181	0.4	0.25	0.325999
gek	Dmel_CG4012	0	0.410847	0.4	0.25	0.325679
yrt	Dmel_CG9764	0	0.410431	0.4	0.25	0.32528
Tsp39D	Dmel_CG8666	0	0.410258	0.4	0.25	0.325115
tou	Dmel_CG10897	0	0.409376	0.4	0.25	0.324271
CG30421	Dmel_CG30421	0	0.409333	0.4	0.25	0.32423
spir	Dmel_CG10076	0	0.409249	0.4	0.25	0.32415
rho-5	Dmel_CG33304	0	0.408977	0.4	0.25	0.32389
Dp1	Dmel_CG5170	0	0.407643	0.4	0.25	0.322617
egl	Dmel_CG4051	0	0.407422	0.4	0.25	0.322406
Amph	Dmel_CG8604	0	0.407401	0.4	0.25	0.322386
Nrg	Dmel_CG1634	0	0.407389	0.4	0.25	0.322375
endoA	Dmel_CG14296	0	0.40685	0.4	0.25	0.321861
S	Dmel_CG4385	0	0.406594	0.4	0.25	0.321618
Aps	Dmel_CG6391	0	0.406427	0.4	0.25	0.321459
pyd	Dmel_CG31349	0	0.405551	0.4	0.25	0.320626
bun	Dmel_CG42281	0	0.405345	0.4	0.25	0.32043
cdi	Dmel_CG6027	0	0.404745	0.4	0.25	0.319861
zfh1	Dmel_CG1322	0	0.404212	0.4	0.25	0.319355
CG4768	Dmel_CG4768	-1	0.404173	0.4	0.25	0.319318
pum	Dmel_CG9755	0	0.4041	0.4	0.25	0.319249
eIF4G2	Dmel_CG10192	0	0.403761	0.4	0.25	0.318927
Rab35	Dmel_CG9575	0	0.403699	0.4	0.25	0.318869
Vha100-1	Dmel_CG1709	0	0.403661	0.4	0.25	0.318833
skd	Dmel_CG9936	0	0.403583	0.4	0.25	0.318759
nrv1	Dmel_CG9258	0	0.403581	0.4	0.25	0.318757
CG10948	Dmel_CG10948	0	0.403313	0.4	0.25	0.318503
Doa	Dmel_CG42320	0	0.403159	0.4	0.25	0.318357
Dad	Dmel_CG5201	0	0.402481	0.4	0.25	0.317716
Slip1	Dmel_CG1783	0	0.402346	0.4	0.25	0.317588
Nhe3	Dmel_CG11328	0	0.402046	0.4	0.25	0.317305
AGO2	Dmel_CG7439	0	0.401977	0.4	0.25	0.317239
Nrt	Dmel_CG9704	0	0.401738	0.4	0.25	0.317014
CG32662	Dmel_CG32662	0	0.401608	0.4	0.25	0.316891
Synd	Dmel_CG33094	0	0.400925	0.4	0.25	0.316246
Cirl	Dmel_CG8639	0	0.399576	0.4	0.25	0.314975
CG32479	Dmel_CG32479	0	0.399014	0.4	0.25	0.314447
Crag	Dmel_CG12737	0	0.3985	0.4	0.25	0.313964
CG6767	Dmel_CG6767	0	0.398225	0.4	0.25	0.313705
CG11376	Dmel_CG11376	0	0.398112	0.4	0.25	0.313599
TORC	Dmel_CG6064	0	0.397878	0.4	0.25	0.313379
CG42748	Dmel_CG42748	0	0.397582	0.4	0.25	0.313102
Rtnl1	Dmel_CG33113	0	0.39732	0.4	0.25	0.312856
CG8486	Dmel_CG8486	0	0.397212	0.4	0.25	0.312755
exd	Dmel_CG8933	0	0.3972	0.4	0.25	0.312743
Edc3	Dmel_CG6311	0	0.397099	0.4	0.25	0.312649
lbk	Dmel_CG8434	0	0.39704	0.4	0.25	0.312593
Edem2	Dmel_CG5682	0	0.396862	0.4	0.25	0.312427
Dlic	Dmel_CG1938	0	0.396801	0.4	0.25	0.312369
babo	Dmel_CG8224	0	0.396597	0.4	0.25	0.312178
srp	Dmel_CG3992	0	0.396541	0.4	0.25	0.312126
chic	Dmel_CG9553	0	0.396247	0.4	0.25	0.311851
pUf68	Dmel_CG12085	0	0.396092	0.4	0.25	0.311706
G-salpha60A	Dmel_CG2835	0	0.396009	0.4	0.25	0.311628
chrb	Dmel_CG7533	0	0.395886	0.4	0.25	0.311513
E(bx)	Dmel_CG32346	0	0.395617	0.4	0.25	0.311261
MAPk-Ak2	Dmel_CG3086	0	0.395587	0.4	0.25	0.311233
Pp2B-14D	Dmel_CG9842	0	0.395329	0.4	0.25	0.310992
Pak	Dmel_CG10295	0	0.395287	0.4	0.25	0.310953
Eph	Dmel_CG1511	0	0.395189	0.4	0.25	0.310861
mys	Dmel_CG1560	0	0.394995	0.4	0.25	0.31068
par-6	Dmel_CG5884	0	0.394607	0.4	0.25	0.310317
sba	Dmel_CG13598	0	0.394558	0.4	0.25	0.310272
bsk	Dmel_CG5680	0	0.394079	0.4	0.25	0.309825
crq	Dmel_CG4280	0	0.393457	0.4	0.25	0.309245
CG12054	Dmel_CG12054	0	0.393352	0.4	0.25	0.309147
mbc	Dmel_CG10379	0	0.393098	0.4	0.25	0.30891
spi	Dmel_CG10334	0	0.392486	0.4	0.25	0.308341
CG30015	Dmel_CG30015	0	0.392286	0.4	0.25	0.308155
puc	Dmel_CG7850	0	0.392056	0.4	0.25	0.307941
Stat92E	Dmel_CG4257	0	0.391649	0.4	0.25	0.307563
miple	Dmel_CG1221	0	0.391206	0.4	0.25	0.307151
Eip63E	Dmel_CG10579	0	0.391025	0.4	0.25	0.306983
CtBP	Dmel_CG7583	0	0.391016	0.4	0.25	0.306975
ena	Dmel_CG15112	0	0.390999	0.4	0.25	0.306959
Sbf	Dmel_CG6939	0	0.390977	0.4	0.25	0.306939
norpA	Dmel_CG3620	0	0.390922	0.4	0.25	0.306888
Chro	Dmel_CG10712	0	0.390896	0.4	0.25	0.306864
18w	Dmel_CG8896	0	0.390757	0.4	0.25	0.306735
CG7971	Dmel_CG7971	0	0.390315	0.4	0.25	0.306325
chn	Dmel_CG11798	0	0.390137	0.4	0.25	0.30616
g	Dmel_CG10986	0	0.389652	0.4	0.25	0.305711
scny	Dmel_CG5505	0	0.389638	0.4	0.25	0.305698
CG9339	Dmel_CG9339	0	0.389637	0.4	0.25	0.305697
aop	Dmel_CG3166	0	0.389556	0.4	0.25	0.305622
kay	Dmel_CG33956	0	0.3895	0.4	0.25	0.30557
Graf	Dmel_CG8948	0	0.389011	0.4	0.25	0.305118
CG11247	Dmel_CG11247	0	0.388714	0.4	0.25	0.304843
Cip4	Dmel_CG15015	0	0.388658	0.4	0.25	0.304791
psq	Dmel_CG2368	0	0.38859	0.4	0.25	0.304728
Trp1	Dmel_CG4758	0	0.388517	0.4	0.25	0.304661
luna	Dmel_CG33473	0	0.388263	0.4	0.25	0.304426
B4	Dmel_CG9239	0	0.388094	0.4	0.25	0.30427
CG31531	Dmel_CG31531	0	0.387756	0.4	0.25	0.303958
eIF4G	Dmel_CG10811	0	0.386259	0.4	0.25	0.302578
CG31211	Dmel_CG31211	0	0.385879	0.4	0.25	0.302229
CG3061	Dmel_CG3061	0	0.385693	0.4	0.25	0.302058
nrv2	Dmel_CG9261	0	0.385507	0.4	0.25	0.301887
mp	Dmel_CG42543	0	0.385368	0.4	0.25	0.301759
CG32000	Dmel_CG32000	0	0.385159	0.4	0.25	0.301567
TBPH	Dmel_CG10327	0	0.3845	0.4	0.25	0.300962
Syn	Dmel_CG3985	0	0.384425	0.4	0.25	0.300893
Vang	Dmel_CG8075	0	0.384243	0.4	0.25	0.300726
p130CAS	Dmel_CG1212	0	0.384236	0.4	0.25	0.300719
lute	Dmel_CG5319	0	0.383992	0.4	0.25	0.300496
CG7646	Dmel_CG7646	0	0.383938	0.4	0.25	0.300446
mop	Dmel_CG9311	0	0.38386	0.4	0.25	0.300375
Rapgap1	Dmel_CG34374	0	0.383731	0.4	0.25	0.300256
fax	Dmel_CG4609	0	0.383688	0.4	0.25	0.300217
CG9425	Dmel_CG9425	0	0.383548	0.4	0.25	0.300089
Rab1	Dmel_CG3320	0	0.383322	0.4	0.25	0.299882
CG4538	Dmel_CG4538	0	0.383097	0.4	0.25	0.299676
CkIIbeta	Dmel_CG15224	0	0.383051	0.4	0.25	0.299633
arm	Dmel_CG11579	0	0.382988	0.4	0.25	0.299576
CRMP	Dmel_CG1411	0	0.382284	0.4	0.25	0.298932
CG9636	Dmel_CG9636	0	0.382157	0.4	0.25	0.298816
CG32767	Dmel_CG32767	0	0.381857	0.4	0.25	0.298542
CG18812	Dmel_CG18812	0	0.381802	0.4	0.25	0.298491
Xe7	Dmel_CG2179	0	0.381217	0.4	0.25	0.297957
Dek	Dmel_CG5935	0	0.381183	0.4	0.25	0.297926
Ubc-E2H	Dmel_CG2257	0	0.38111	0.4	0.25	0.29786
Con	Dmel_CG7503	0	0.381052	0.4	0.25	0.297807
Atg8a	Dmel_CG32672	0	0.380939	0.4	0.25	0.297704
vav	Dmel_CG7893	0	0.380809	0.4	0.25	0.297585
synj	Dmel_CG6562	0	0.380627	0.4	0.25	0.297419
CG5746	Dmel_CG5746	0	0.380457	0.4	0.25	0.297264
Vha68-1	Dmel_CG12403	0	0.38042	0.4	0.25	0.297231
CG10777	Dmel_CG10777	0	0.379773	0.4	0.25	0.296641
CrebA	Dmel_CG7450	0	0.379717	0.4	0.25	0.29659
fra	Dmel_CG8581	0	0.379564	0.4	0.25	0.296451
onecut	Dmel_CG1922	0	0.379486	0.4	0.25	0.29638
ftz-f1	Dmel_CG4059	0	0.379081	0.4	0.25	0.296012
CG6454	Dmel_CG6454	0	0.379006	0.4	0.25	0.295944
Rab7	Dmel_CG5915	0	0.378528	0.4	0.25	0.29551
Imp	Dmel_CG1691	0	0.378468	0.4	0.25	0.295455
Bsg25D	Dmel_CG14025	0	0.378309	0.4	0.25	0.295311
CG10631	Dmel_CG10631	0	0.378261	0.4	0.25	0.295267
MESK2	Dmel_CG15669	0	0.378228	0.4	0.25	0.295237
Usp7	Dmel_CG1490	-1	0.378228	0.4	0.25	0.295237
fog	Dmel_CG9559	0	0.37803	0.4	0.25	0.295058
HPS4	Dmel_CG4966	0	0.377301	0.4	0.25	0.294397
swm	Dmel_CG10084	0	0.377205	0.4	0.25	0.29431
CG15817	Dmel_CG15817	0	0.377035	0.4	0.25	0.294156
Baldspot	Dmel_CG3971	0	0.376997	0.4	0.25	0.294121
Fur1	Dmel_CG10772	0	0.376836	0.4	0.25	0.293975
roq	Dmel_CG16807	0	0.376767	0.4	0.25	0.293913
RpII215	Dmel_CG1554	0	0.376507	0.4	0.25	0.293678
stai	Dmel_CG31641	0	0.376478	0.4	0.25	0.293651
E2f	Dmel_CG6376	0	0.376268	0.4	0.25	0.293461
Oda	Dmel_CG16747	0	0.376258	0.4	0.25	0.293452
Aac11	Dmel_CG6582	0	0.376256	0.4	0.25	0.293451
Vrp1	Dmel_CG13503	0	0.376105	0.4	0.25	0.293314
Vha55	Dmel_CG17369	0	0.375839	0.4	0.25	0.293074
Rab2	Dmel_CG3269	0	0.375762	0.4	0.25	0.293004
Pat1	Dmel_CG10695	0	0.375754	0.4	0.25	0.292997
ssp4	Dmel_CG33130	0	0.375501	0.4	0.25	0.292768
mts	Dmel_CG7109	0	0.375464	0.4	0.25	0.292735
inx2	Dmel_CG4590	0	0.375447	0.4	0.25	0.292719
drongo	Dmel_CG3365	0	0.375223	0.4	0.25	0.292517
Pi3K21B	Dmel_CG2699	0	0.375164	0.4	0.25	0.292464
Tak1	Dmel_CG18492	0	0.37509	0.4	0.25	0.292397
CG8929	Dmel_CG8929	0	0.375047	0.4	0.25	0.292358
tna	Dmel_CG7958	0	0.375001	0.4	0.25	0.292317
CG2926	Dmel_CG2926	0	0.37495	0.4	0.25	0.292271
CG1021	Dmel_CG1021	0	0.374385	0.4	0.25	0.291761
Vps35	Dmel_CG5625	0	0.374317	0.4	0.25	0.2917
CG14023	Dmel_CG14023	0	0.373685	0.4	0.25	0.291131
bif	Dmel_CG1822	0	0.373577	0.4	0.25	0.291033
Mkp3	Dmel_CG14080	0	0.373512	0.4	0.25	0.290975
nudE	Dmel_CG8104	0	0.3734	0.4	0.25	0.290874
slik	Dmel_CG4527	0	0.373274	0.4	0.25	0.290761
Nf1	Dmel_CG8318	1	0.371892	0.4	0.333333	0.289519
Trn	Dmel_CG7398	0	0.371779	0.4	0.333333	0.289418
CG10353	Dmel_CG10353	0	0.371657	0.4	0.333333	0.289308
l(3)L1231	Dmel_CG7832	0	0.371543	0.4	0.333333	0.289206
B52	Dmel_CG10851	0	0.371343	0.4	0.333333	0.289027
Sema-1a	Dmel_CG18405	0	0.370701	0.4	0.333333	0.288452
Axn	Dmel_CG7926	0	0.370686	0.4	0.333333	0.288438
CG9171	Dmel_CG9171	0	0.370568	0.4	0.333333	0.288333
CG30118	Dmel_CG30118	0	0.370493	0.4	0.333333	0.288266
CG6422	Dmel_CG6422	0	0.36996	0.4	0.333333	0.287789
bon	Dmel_CG5206	0	0.369846	0.4	0.333333	0.287687
Mcr	Dmel_CG7586	0	0.369826	0.4	0.333333	0.287669
CG5098	Dmel_CG5098	0	0.369539	0.4	0.333333	0.287413
CG42724	Dmel_CG42724	0	0.369492	0.4	0.333333	0.287371
sxc	Dmel_CG10392	0	0.368986	0.4	0.333333	0.286919
Mad	Dmel_CG12399	0	0.368982	0.4	0.333333	0.286915
CG6707	Dmel_CG6707	0	0.368785	0.4	0.333333	0.286739
dm	Dmel_CG10798	0	0.368585	0.4	0.333333	0.286561
Hip14	Dmel_CG6017	0	0.368493	0.4	0.333333	0.286479
NELF-A	Dmel_CG5874	0	0.368086	0.4	0.333333	0.286116
Vha44	Dmel_CG8048	0	0.367894	0.4	0.333333	0.285945
brat	Dmel_CG10719	0	0.367884	0.4	0.333333	0.285936
Ac3	Dmel_CG1506	0	0.36787	0.4	0.333333	0.285924
Vps26	Dmel_CG14804	0	0.36729	0.4	0.333333	0.285408
CG9044	Dmel_CG9044	0	0.36719	0.4	0.333333	0.285319
CG11399	Dmel_CG11399	0	0.367182	0.4	0.333333	0.285311
Oatp74D	Dmel_CG7571	0	0.366613	0.4	0.333333	0.284806
CG16791	Dmel_CG16791	0	0.366346	0.4	0.333333	0.284568
Xrp1	Dmel_CG17836	0	0.366338	0.4	0.333333	0.284561
tai	Dmel_CG13109	0	0.365907	0.4	0.333333	0.284179
CG9086	Dmel_CG9086	0	0.365852	0.4	0.333333	0.28413
CalpA	Dmel_CG7563	0	0.365711	0.4	0.333333	0.284005
lack	Dmel_CG4943	0	0.364895	0.4	0.333333	0.283282
kcc	Dmel_CG5594	0	0.364851	0.4	0.333333	0.283243
CG8726	Dmel_CG8726	0	0.364727	0.4	0.333333	0.283133
growl	Dmel_CG14648	0	0.364714	0.4	0.333333	0.283121
Gp150	Dmel_CG5820	0	0.364096	0.4	0.333333	0.282575
stau	Dmel_CG5753	0	0.364055	0.4	0.333333	0.282538
CG4887	Dmel_CG4887	0	0.363873	0.4	0.333333	0.282377
Abi	Dmel_CG9749	0	0.363396	0.4	0.333333	0.281956
Anxb11	Dmel_CG9968	0	0.363137	0.4	0.333333	0.281727
l(1)G0289	Dmel_CG2221	0	0.362986	0.4	0.333333	0.281594
Tango13	Dmel_CG32632	0	0.36293	0.4	0.333333	0.281545
east	Dmel_CG4399	0	0.362922	0.4	0.333333	0.281538
GlcAT-P	Dmel_CG6207	0	0.362821	0.4	0.333333	0.281448
Ptpmeg	Dmel_CG1228	0	0.362599	0.4	0.333333	0.281253
crb	Dmel_CG6383	0	0.362464	0.4	0.333333	0.281134
Hnf4	Dmel_CG9310	0	0.362381	0.4	0.333333	0.28106
Ssdp	Dmel_CG7187	0	0.362305	0.4	0.333333	0.280993
CG31998	Dmel_CG31998	0	0.362023	0.4	0.333333	0.280745
CG11033	Dmel_CG11033	0	0.362009	0.4	0.333333	0.280733
CG4266	Dmel_CG4266	0	0.361804	0.4	0.333333	0.280552
robo	Dmel_CG13521	0	0.361479	0.4	0.333333	0.280266
Liprin-alpha	Dmel_CG11199	0	0.361363	0.4	0.333333	0.280164
Rm62	Dmel_CG10279	0	0.361354	0.4	0.333333	0.280156
Ge-1	Dmel_CG6181	0	0.361313	0.4	0.333333	0.28012
CG4360	Dmel_CG4360	0	0.361271	0.4	0.333333	0.280083
CG13784	Dmel_CG13784	0	0.360766	0.4	0.333333	0.279639
Msr-110	Dmel_CG10596	0	0.360737	0.4	0.333333	0.279614
Pitslre	Dmel_CG4268	0	0.360178	0.4	0.333333	0.279123
Tsp42Ee	Dmel_CG10106	0	0.36011	0.4	0.333333	0.279063
RASSF8	Dmel_CG5053	0	0.359917	0.4	0.333333	0.278894
Lac	Dmel_CG12369	0	0.359868	0.4	0.333333	0.278851
bowl	Dmel_CG10021	0	0.359868	0.4	0.333333	0.278851
CG8155	Dmel_CG8155	0	0.359565	0.4	0.333333	0.278585
Pvr	Dmel_CG8222	0	0.359536	0.4	0.333333	0.27856
Cp190	Dmel_CG6384	0	0.359378	0.4	0.333333	0.278421
RhoGAP68F	Dmel_CG6811	0	0.359279	0.4	0.333333	0.278334
Dab	Dmel_CG9695	0	0.359247	0.4	0.333333	0.278306
Sulf1	Dmel_CG6725	0	0.359206	0.4	0.333333	0.27827
Pi3K92E	Dmel_CG4141	0	0.359036	0.4	0.333333	0.278121
CG31716	Dmel_CG31716	0	0.358902	0.4	0.333333	0.278004
alpha-Cat	Dmel_CG17947	0	0.358637	0.4	0.333333	0.277772
CG1607	Dmel_CG1607	0	0.358612	0.4	0.333333	0.27775
Pdp1	Dmel_CG17888	0	0.358386	0.4	0.333333	0.277553
CG42668	Dmel_CG42668	0	0.358134	0.4	0.333333	0.277332
Pak3	Dmel_CG14895	0	0.357909	0.4	0.333333	0.277136
msi	Dmel_CG5099	0	0.357555	0.4	0.333333	0.276826
CG16974	Dmel_CG16974	0	0.357425	0.4	0.333333	0.276713
l(2)k16918	Dmel_CG3920	0	0.357417	0.4	0.333333	0.276706
ph-p	Dmel_CG18412	0	0.3573	0.4	0.333333	0.276604
Pp1alpha-96A	Dmel_CG6593	0	0.357216	0.4	0.333333	0.27653
CG31158	Dmel_CG31158	0	0.356916	0.4	0.333333	0.276269
da	Dmel_CG5102	0	0.3567	0.4	0.333333	0.27608
G9a	Dmel_CG2995	0	0.356458	0.4	0.333333	0.275869
Nc73EF	Dmel_CG11661	0	0.356268	0.4	0.333333	0.275704
CG1513	Dmel_CG1513	0	0.35626	0.4	0.333333	0.275697
NetB	Dmel_CG10521	0	0.356215	0.4	0.333333	0.275658
CG8678	Dmel_CG8678	0	0.35603	0.4	0.333333	0.275497
Cbl	Dmel_CG7037	0	0.355908	0.4	0.333333	0.27539
CG18811	Dmel_CG18811	0	0.355825	0.4	0.333333	0.275318
itp	Dmel_CG13586	0	0.355785	0.4	0.333333	0.275283
eas	Dmel_CG3525	0	0.355713	0.4	0.333333	0.275221
Tis11	Dmel_CG4070	0	0.35561	0.4	0.333333	0.275131
rgn	Dmel_CG6014	0	0.355551	0.4	0.333333	0.27508
ia2	Dmel_CG31795	0	0.355263	0.4	0.333333	0.274829
HmgZ	Dmel_CG17921	0	0.355253	0.4	0.333333	0.274821
lt	Dmel_CG18028	0	0.355149	0.4	0.333333	0.27473
CG8176	Dmel_CG8176	0	0.355121	0.4	0.333333	0.274706
Spn	Dmel_CG16757	0	0.354892	0.4	0.333333	0.274507
CG3711	Dmel_CG3711	0	0.3548	0.4	0.333333	0.274427
CG11009	Dmel_CG11009	0	0.354614	0.4	0.333333	0.274265
CG6983	Dmel_CG6983	0	0.354253	0.4	0.333333	0.273952
glo	Dmel_CG6946	0	0.354043	0.4	0.333333	0.27377
Klc	Dmel_CG5433	0	0.35384	0.4	0.333333	0.273594
CG5522	Dmel_CG5522	0	0.353796	0.4	0.333333	0.273556
Bruce	Dmel_CG6303	0	0.353768	0.4	0.333333	0.273532
CG2316	Dmel_CG2316	0	0.353663	0.4	0.333333	0.273441
CG32264	Dmel_CG32264	0	0.353594	0.4	0.333333	0.273381
numb	Dmel_CG3779	0	0.353522	0.4	0.333333	0.273318
CG7053	Dmel_CG7053	0	0.353491	0.4	0.333333	0.273291
Fak56D	Dmel_CG10023	0	0.353286	0.4	0.333333	0.273114
Btk29A	Dmel_CG8049	0	0.353218	0.4	0.333333	0.273055
CG7611	Dmel_CG7611	0	0.353034	0.4	0.333333	0.272896
CG31712	Dmel_CG31712	0	0.352856	0.4	0.333333	0.272742
CG7112	Dmel_CG7112	0	0.35282	0.4	0.333333	0.272711
Pi3K68D	Dmel_CG11621	0	0.352723	0.4	0.333333	0.272627
hop	Dmel_CG1594	0	0.351864	0.4	0.333333	0.271884
Su(z)12	Dmel_CG8013	0	0.351742	0.4	0.333333	0.271779
CG14446	Dmel_CG14446	0	0.351696	0.4	0.333333	0.271739
sina	Dmel_CG9949	0	0.351352	0.4	0.333333	0.271442
rdx	Dmel_CG12537	0	0.351001	0.4	0.333333	0.27114
RhoGAP71E	Dmel_CG32149	0	0.350683	0.4	0.333333	0.270866
CG11537	Dmel_CG11537	0	0.350434	0.4	0.333333	0.270651
CG9894	Dmel_CG9894	0	0.350394	0.4	0.333333	0.270617
dpp	Dmel_CG9885	0	0.350364	0.4	0.333333	0.270591
CG15099	Dmel_CG15099	0	0.350322	0.4	0.333333	0.270555
bip2	Dmel_CG2009	0	0.35026	0.4	0.333333	0.270501
plx	Dmel_CG42612	0	0.350173	0.4	0.333333	0.270426
dbr	Dmel_CG11371	0	0.349906	0.4	0.333333	0.270197
tral	Dmel_CG10686	0	0.349703	0.4	0.333333	0.270022
CG1316	Dmel_CG1316	0	0.349579	0.4	0.333333	0.269916
otk	Dmel_CG8967	0	0.349468	0.4	0.333333	0.26982
CG6329	Dmel_CG6329	0	0.349378	0.4	0.333333	0.269743
heph	Dmel_CG31000	0	0.349349	0.4	0.333333	0.269718
bchs	Dmel_CG14001	0	0.349015	0.4	0.333333	0.269431
CG9801	Dmel_CG9801	0	0.348745	0.4	0.333333	0.269199
CG9426	Dmel_CG9426	0	0.348701	0.4	0.333333	0.269162
PP2A-B'	Dmel_CG7913	0	0.348539	0.4	0.333333	0.269023
CG6966	Dmel_CG6966	0	0.348412	0.4	0.333333	0.268914
Adar	Dmel_CG12598	0	0.348147	0.4	0.333333	0.268686
sd	Dmel_CG8544	0	0.34813	0.4	0.333333	0.268672
Patr-1	Dmel_CG5208	0	0.348071	0.4	0.333333	0.268621
hts	Dmel_CG9325	0	0.348021	0.4	0.333333	0.268578
HDAC4	Dmel_CG1770	0	0.347953	0.4	0.333333	0.26852
CG3530	Dmel_CG3530	0	0.347713	0.4	0.333333	0.268315
Rga	Dmel_CG2161	0	0.34759	0.4	0.333333	0.268209
vap	Dmel_CG9209	0	0.347338	0.4	0.333333	0.267994
Mapmodulin	Dmel_CG5784	0	0.347265	0.4	0.333333	0.267931
CG31637	Dmel_CG31637	0	0.347039	0.4	0.333333	0.267738
CG32210	Dmel_CG32210	0	0.346903	0.4	0.333333	0.267621
fray	Dmel_CG7693	0	0.346876	0.4	0.333333	0.267598
Rip11	Dmel_CG6606	0	0.34674	0.4	0.333333	0.267482
CG3961	Dmel_CG3961	0	0.34668	0.4	0.333333	0.267431
CG6509	Dmel_CG6509	0	0.346331	0.4	0.333333	0.267133
CG8830	Dmel_CG8830	0	0.345973	0.4	0.333333	0.266827
retm	Dmel_CG9528	0	0.345539	0.4	0.333333	0.266457
Bsg	Dmel_CG31605	0	0.345504	0.4	0.333333	0.266427
CG9007	Dmel_CG9007	0	0.345464	0.4	0.333333	0.266393
CG32772	Dmel_CG32772	0	0.345312	0.4	0.333333	0.266263
rap	Dmel_CG3000	0	0.344864	0.4	0.333333	0.265882
Rme-8	Dmel_CG8014	0	0.344825	0.4	0.333333	0.265849
Eb1	Dmel_CG3265	0	0.344613	0.4	0.333333	0.265668
Vha26	Dmel_CG1088	0	0.344598	0.4	0.333333	0.265655
ctp	Dmel_CG6998	0	0.344336	0.4	0.333333	0.265433
BicD	Dmel_CG6605	0	0.34424	0.4	0.333333	0.265351
WASp	Dmel_CG1520	0	0.344111	0.4	0.333333	0.265241
Kap3	Dmel_CG11759	0	0.344074	0.4	0.333333	0.26521
p120ctn	Dmel_CG17484	0	0.343902	0.4	0.333333	0.265064
ced-6	Dmel_CG11804	0	0.343818	0.4	0.333333	0.264992
Met	Dmel_CG1705	0	0.343806	0.4	0.333333	0.264982
Moe	Dmel_CG10701	0	0.343618	0.4	0.333333	0.264822
CG9318	Dmel_CG9318	0	0.343606	0.4	0.333333	0.264812
Nak	Dmel_CG10637	0	0.343455	0.4	0.333333	0.264684
CG13366	Dmel_CG13366	0	0.343242	0.4	0.333333	0.264503
Npc1a	Dmel_CG5722	0	0.342368	0.4	0.333333	0.263762
CG3907	Dmel_CG3907	0	0.342239	0.4	0.333333	0.263653
ps	Dmel_CG42670	0	0.341918	0.4	0.333333	0.263381
csw	Dmel_CG3954	0	0.341864	0.4	0.333333	0.263335
Snap	Dmel_CG6625	0	0.341796	0.4	0.333333	0.263278
eIF5	Dmel_CG9177	0	0.341623	0.4	0.333333	0.263131
CG4857	Dmel_CG4857	0	0.341328	0.4	0.333333	0.262882
RhoGAP18B	Dmel_CG42274	0	0.341263	0.4	0.333333	0.262827
Pka-R1	Dmel_CG42341	0	0.341109	0.4	0.333333	0.262697
CG1910	Dmel_CG1910	0	0.341093	0.4	0.333333	0.262683
milt	Dmel_CG13777	0	0.341053	0.4	0.333333	0.26265
kst	Dmel_CG12008	0	0.34073	0.4	0.333333	0.262377
RYBP	Dmel_CG12190	0	0.340186	0.4	0.333333	0.261918
CG3714	Dmel_CG3714	0	0.340111	0.4	0.333333	0.261855
Sh3beta	Dmel_CG8582	0	0.340087	0.4	0.333333	0.261834
yu	Dmel_CG3249	0	0.340057	0.4	0.333333	0.261809
CG9384	Dmel_CG9384	0	0.339751	0.4	0.333333	0.261551
Fit1	Dmel_CG14991	0	0.339623	0.4	0.333333	0.261443
CG30389	Dmel_CG30389	0	0.339531	0.4	0.333333	0.261366
CG3305	Dmel_CG3305	0	0.339256	0.4	0.333333	0.261134
CG7739	Dmel_CG7739	0	0.339178	0.4	0.333333	0.261069
atl	Dmel_CG6668	0	0.33858	0.4	0.333333	0.260566
CG13868	Dmel_CG13868	0	0.338496	0.4	0.333333	0.260495
Zn72D	Dmel_CG5215	0	0.338317	0.4	0.333333	0.260345
CG8232	Dmel_CG8232	0	0.338186	0.4	0.333333	0.260235
didum	Dmel_CG2146	0	0.337958	0.4	0.333333	0.260043
ssp2	Dmel_CG9028	0	0.337832	0.4	0.333333	0.259938
CG1832	Dmel_CG1832	-1	0.337734	0.4	0.333333	0.259856
path	Dmel_CG3424	0	0.337585	0.4	0.333333	0.259731
Arf51F	Dmel_CG8156	0	0.337549	0.4	0.333333	0.2597
wde	Dmel_CG12340	0	0.336642	0.4	0.333333	0.25894
l(1)G0196	Dmel_CG14616	0	0.336607	0.4	0.333333	0.258911
CG8557	Dmel_CG8557	0	0.336605	0.4	0.333333	0.258909
Lap1	Dmel_CG10255	0	0.336383	0.4	0.333333	0.258724
Ac13E	Dmel_CG9210	0	0.336072	0.4	0.333333	0.258464
bl	Dmel_CG13425	0	0.335714	0.4	0.333333	0.258164
nkd	Dmel_CG11614	0	0.335553	0.4	0.333333	0.25803
CG13124	Dmel_CG13124	0	0.335235	0.4	0.333333	0.257764
car	Dmel_CG12230	0	0.335107	0.4	0.333333	0.257658
Rox8	Dmel_CG5422	0	0.334712	0.4	0.333333	0.257328
wun	Dmel_CG8804	-1	0.334492	0.4	0.333333	0.257145
Indy	Dmel_CG3979	0	0.334467	0.4	0.333333	0.257124
fz2	Dmel_CG9739	0	0.334308	0.4	0.333333	0.256992
CG1951	Dmel_CG1951	0	0.334177	0.4	0.333333	0.256882
CG32043	Dmel_CG32043	0	0.334153	0.4	0.333333	0.256862
CG11347	Dmel_CG11347	0	0.334121	0.4	0.333333	0.256836
CG6191	Dmel_CG6191	0	0.334053	0.4	0.333333	0.256779
vig	Dmel_CG4170	0	0.333919	0.4	0.333333	0.256668
Ef1alpha100E	Dmel_CG1873	0	0.333917	0.4	0.333333	0.256666
CG11138	Dmel_CG11138	0	0.333837	0.4	0.333333	0.256599
CG11006	Dmel_CG11006	0	0.333718	0.4	0.333333	0.2565
Arf79F	Dmel_CG8385	0	0.333656	0.4	0.333333	0.256449
bru-3	Dmel_CG12478	0	0.333605	0.4	0.333333	0.256406
hig	Dmel_CG2040	0	0.333539	0.4	0.333333	0.256352
CG7466	Dmel_CG7466	0	0.333505	0.4	0.333333	0.256323
rho	Dmel_CG1004	0	0.333438	0.4	0.333333	0.256268
CG15309	Dmel_CG15309	0	0.333386	0.4	0.333333	0.256224
Nipped-A	Dmel_CG33554	0	0.332829	0.4	0.333333	0.255762
lap	Dmel_CG2520	0	0.332823	0.4	0.333333	0.255757
NK7.1	Dmel_CG8524	0	0.332661	0.4	0.333333	0.255622
Atf6	Dmel_CG3136	0	0.332458	0.4	0.333333	0.255454
corto	Dmel_CG2530	0	0.332218	0.4	0.333333	0.255255
CG5455	Dmel_CG5455	0	0.332216	0.4	0.333333	0.255253
CG3662	Dmel_CG3662	0	0.331394	0.4	0.333333	0.254572
CG3529	Dmel_CG3529	0	0.331363	0.4	0.333333	0.254546
Tl	Dmel_CG5490	0	0.331321	0.4	0.333333	0.254512
Gbeta13F	Dmel_CG10545	0	0.331321	0.4	0.333333	0.254512
CG1486	Dmel_CG1486	0	0.330926	0.4	0.333333	0.254185
Cortactin	Dmel_CG3637	0	0.330893	0.4	0.333333	0.254157
CG7145	Dmel_CG7145	0	0.330874	0.4	0.333333	0.254142
shrb	Dmel_CG8055	0	0.330565	0.4	0.333333	0.253886
CG8878	Dmel_CG8878	0	0.330483	0.4	0.333333	0.253819
CG5604	Dmel_CG5604	0	0.330401	0.4	0.333333	0.253751
Hrb98DE	Dmel_CG9983	0	0.330394	0.4	0.333333	0.253745
toc	Dmel_CG9660	0	0.330394	0.4	0.333333	0.253745
usp	Dmel_CG4380	0	0.33024	0.4	0.333333	0.253618
S6k	Dmel_CG10539	1	0.32998	0.4	0.416667	0.253403
pds5	Dmel_CG17509	0	0.329871	0.4	0.416667	0.253313
CadN	Dmel_CG7100	0	0.329666	0.4	0.416667	0.253144
CG3164	Dmel_CG3164	0	0.329539	0.4	0.416667	0.253039
Rgl	Dmel_CG8865	0	0.329504	0.4	0.416667	0.253011
Rac1	Dmel_CG2248	0	0.329403	0.4	0.416667	0.252927
Pten	Dmel_CG5671	0	0.329231	0.4	0.416667	0.252786
qkr58E-3	Dmel_CG3584	0	0.329059	0.4	0.416667	0.252644
CG8963	Dmel_CG8963	0	0.328782	0.4	0.416667	0.252416
Actbeta	Dmel_CG11062	0	0.328717	0.4	0.416667	0.252362
lolal	Dmel_CG5738	0	0.328614	0.4	0.416667	0.252278
CG1090	Dmel_CG1090	0	0.328587	0.4	0.416667	0.252255
Fmr1	Dmel_CG6203	1	0.328448	0.4	0.5	0.252141
CG1600	Dmel_CG1600	0	0.328421	0.4	0.5	0.252119
alt	Dmel_CG18212	0	0.328324	0.4	0.5	0.252039
mbl	Dmel_CG33197	0	0.328181	0.4	0.5	0.251921
rictor	Dmel_CG8002	0	0.32813	0.4	0.5	0.25188
Ank2	Dmel_CG42734	0	0.32803	0.4	0.5	0.251797
CG7220	Dmel_CG7220	0	0.327804	0.4	0.5	0.251612
lig	Dmel_CG8715	0	0.327214	0.4	0.5	0.251127
wech	Dmel_CG42396	0	0.327186	0.4	0.5	0.251104
CG34349	Dmel_CG34349	0	0.32692	0.4	0.5	0.250886
sn	Dmel_CG32858	0	0.326726	0.4	0.5	0.250727
trc	Dmel_CG8637	0	0.326655	0.4	0.5	0.250669
Appl	Dmel_CG7727	0	0.326546	0.4	0.5	0.25058
MESR3	Dmel_CG15162	0	0.326414	0.4	0.5	0.250472
Syt1	Dmel_CG3139	0	0.326413	0.4	0.5	0.250471
wdb	Dmel_CG5643	0	0.326381	0.4	0.5	0.250445
Sir2	Dmel_CG5216	0	0.326331	0.4	0.5	0.250404
fne	Dmel_CG4396	0	0.326225	0.4	0.5	0.250317
aux	Dmel_CG1107	0	0.325668	0.4	0.5	0.249861
fok	Dmel_CG10746	0	0.325452	0.4	0.5	0.249685
CG42240	Dmel_CG42240	0	0.325266	0.4	0.5	0.249533
amon	Dmel_CG6438	0	0.325078	0.4	0.5	0.249379
MED26	Dmel_CG1793	0	0.324993	0.4	0.5	0.24931
chinmo	Dmel_CG31666	0	0.32483	0.4	0.5	0.249177
alpha-Spec	Dmel_CG1977	0	0.32472	0.4	0.5	0.249087
unc-5	Dmel_CG8166	0	0.32435	0.4	0.5	0.248785
Rab11	Dmel_CG5771	0	0.324313	0.4	0.5	0.248755
CG11148	Dmel_CG11148	0	0.324029	0.4	0.5	0.248524
sdk	Dmel_CG5227	0	0.323992	0.4	0.5	0.248493
wapl	Dmel_CG3707	0	0.323839	0.4	0.5	0.248369
eIF-1A	Dmel_CG8053	0	0.323689	0.4	0.5	0.248247
CG30122	Dmel_CG30122	0	0.323581	0.4	0.5	0.248159
tkv	Dmel_CG14026	0	0.3233	0.4	0.5	0.24793
Ide	Dmel_CG5517	0	0.323166	0.4	0.5	0.247821
Sema-2a	Dmel_CG4700	0	0.322992	0.4	0.5	0.24768
CG32529	Dmel_CG32529	0	0.322986	0.4	0.5	0.247675
CG5741	Dmel_CG5741	0	0.322575	0.4	0.5	0.247341
vlc	Dmel_CG8390	-1	0.322513	0.375	0.5	0.247291
scrt	Dmel_CG1130	0	0.322413	0.375	0.5	0.247209
bru-2	Dmel_CG31761	0	0.322405	0.375	0.5	0.247203
mfrn	Dmel_CG4963	0	0.32237	0.375	0.5	0.247175
CG5375	Dmel_CG5375	0	0.322236	0.375	0.5	0.247066
Pino	Dmel_CG4710	0	0.321795	0.375	0.5	0.246708
lva	Dmel_CG6450	0	0.321712	0.375	0.5	0.246641
Cad87A	Dmel_CG6977	0	0.321596	0.375	0.5	0.246547
Galpha49B	Dmel_CG17759	0	0.321207	0.375	0.5	0.246232
Mkrn1	Dmel_CG7184	0	0.320856	0.375	0.5	0.245948
CG6954	Dmel_CG6954	0	0.320773	0.375	0.5	0.245881
CG1965	Dmel_CG1965	0	0.320762	0.375	0.5	0.245872
CG4751	Dmel_CG4751	0	0.320731	0.375	0.5	0.245847
LanB1	Dmel_CG7123	0	0.320525	0.375	0.5	0.24568
Jarid2	Dmel_CG3654	0	0.320367	0.375	0.5	0.245552
su(s)	Dmel_CG6222	0	0.3201	0.375	0.5	0.245337
CG8443	Dmel_CG8443	0	0.319965	0.375	0.5	0.245228
tamo	Dmel_CG4057	0	0.319959	0.375	0.5	0.245223
CG9795	Dmel_CG9795	0	0.319506	0.375	0.5	0.244857
scrib	Dmel_CG42614	0	0.319398	0.375	0.5	0.24477
CG18317	Dmel_CG18317	0	0.319273	0.375	0.5	0.244669
Ptp4E	Dmel_CG6899	0	0.319059	0.375	0.5	0.244497
FBX011	Dmel_CG9461	0	0.319047	0.375	0.5	0.244487
Utx	Dmel_CG5640	0	0.319032	0.375	0.5	0.244475
egr	Dmel_CG12919	0	0.318928	0.375	0.5	0.244391
Deaf1	Dmel_CG8567	0	0.318808	0.375	0.5	0.244295
CG16711	Dmel_CG16711	0	0.318724	0.375	0.5	0.244227
Ubp64E	Dmel_CG5486	0	0.318624	0.375	0.5	0.244147
CG13928	Dmel_CG13928	0	0.318393	0.375	0.5	0.243961
CG16952	Dmel_CG16952	0	0.318355	0.375	0.5	0.24393
CG9281	Dmel_CG9281	0	0.318073	0.375	0.5	0.243703
CG1399	Dmel_CG1399	0	0.317836	0.375	0.5	0.243513
CG12991	Dmel_CG12991	0	0.317737	0.375	0.5	0.243433
CG9775	Dmel_CG9775	0	0.317407	0.375	0.5	0.243168
CG1815	Dmel_CG1815	0	0.317337	0.375	0.5	0.243112
CG3764	Dmel_CG3764	0	0.317137	0.375	0.5	0.242952
CG8974	Dmel_CG8974	0	0.317079	0.375	0.5	0.242905
caps	Dmel_CG11282	0	0.316927	0.375	0.5	0.242783
CG12155	Dmel_CG12155	0	0.316897	0.375	0.5	0.242759
CdGAPr	Dmel_CG10538	0	0.31666	0.375	0.5	0.242569
step	Dmel_CG11628	-1	0.316648	0.352941	0.5	0.242559
Ulp1	Dmel_CG12359	0	0.316622	0.352941	0.5	0.242539
oys	Dmel_CG18445	0	0.316537	0.352941	0.5	0.24247
cert	Dmel_CG7207	0	0.316091	0.352941	0.5	0.242113
scramb1	Dmel_CG32056	0	0.316045	0.352941	0.5	0.242077
Bre1	Dmel_CG10542	0	0.315907	0.352941	0.5	0.241966
CG8485	Dmel_CG8485	0	0.315727	0.352941	0.5	0.241822
Dnz1	Dmel_CG6627	0	0.315461	0.352941	0.5	0.241609
CG10321	Dmel_CG10321	0	0.315444	0.352941	0.5	0.241596
tup	Dmel_CG10619	-1	0.315358	0.333333	0.5	0.241527
CG7083	Dmel_CG7083	0	0.315318	0.333333	0.5	0.241495
Rsf1	Dmel_CG5655	0	0.315204	0.333333	0.5	0.241404
bves	Dmel_CG32513	0	0.315138	0.333333	0.5	0.241351
Myb	Dmel_CG9045	0	0.314864	0.333333	0.5	0.241133
CG15745	Dmel_CG15745	0	0.314799	0.333333	0.5	0.241081
CG4853	Dmel_CG4853	0	0.314728	0.333333	0.5	0.241024
NKAIN	Dmel_CG34413	0	0.314721	0.333333	0.5	0.241018
CG9977	Dmel_CG9977	0	0.314694	0.333333	0.5	0.240997
Chd64	Dmel_CG14996	0	0.314544	0.333333	0.5	0.240877
Mitf	Dmel_CG17469	0	0.314495	0.333333	0.5	0.240838
shep	Dmel_CG32423	0	0.314477	0.333333	0.5	0.240824
ko	Dmel_CG10573	0	0.314321	0.333333	0.5	0.240699
CG4747	Dmel_CG4747	0	0.314191	0.333333	0.5	0.240596
CLIP-190	Dmel_CG5020	0	0.314151	0.333333	0.5	0.240564
rogdi	Dmel_CG7725	0	0.314081	0.333333	0.5	0.240508
sbb	Dmel_CG5580	0	0.31407	0.333333	0.5	0.240499
Syt4	Dmel_CG10047	0	0.314031	0.333333	0.5	0.240468
Sam-S	Dmel_CG2674	0	0.314022	0.333333	0.5	0.240461
Rbcn-3A	Dmel_CG3585	0	0.313833	0.333333	0.5	0.240311
mle	Dmel_CG11680	0	0.3136	0.333333	0.5	0.240125
Cul-2	Dmel_CG1512	0	0.31335	0.333333	0.5	0.239926
CG12016	Dmel_CG12016	0	0.312858	0.333333	0.5	0.239535
nmo	Dmel_CG7892	0	0.31285	0.333333	0.5	0.239529
CG2747	Dmel_CG2747	0	0.312727	0.333333	0.5	0.239431
CG17124	Dmel_CG17124	0	0.312661	0.333333	0.5	0.239379
sm	Dmel_CG9218	0	0.312455	0.333333	0.5	0.239215
CG31729	Dmel_CG31729	0	0.311917	0.333333	0.5	0.238788
CG6765	Dmel_CG6765	0	0.311356	0.333333	0.5	0.238344
Lam	Dmel_CG6944	0	0.311283	0.333333	0.5	0.238286
ytr	Dmel_CG18426	0	0.310963	0.333333	0.5	0.238033
CG9238	Dmel_CG9238	0	0.310963	0.333333	0.5	0.238033
CycY	Dmel_CG14939	0	0.310866	0.333333	0.5	0.237956
syd	Dmel_CG8110	0	0.310166	0.333333	0.5	0.237403
CG34417	Dmel_CG34417	0	0.309306	0.333333	0.5	0.236724
pcx	Dmel_CG3443	0	0.308475	0.333333	0.5	0.23607
qkr58E-1	Dmel_CG3613	0	0.30845	0.333333	0.5	0.23605
Rlip	Dmel_CG11622	0	0.308367	0.333333	0.5	0.235985
raps	Dmel_CG5692	0	0.308315	0.333333	0.5	0.235944
l(3)neo38	Dmel_CG6930	0	0.30817	0.333333	0.5	0.23583
CG32017	Dmel_CG32017	0	0.308161	0.333333	0.5	0.235823
CG2083	Dmel_CG2083	0	0.307764	0.333333	0.5	0.235511
CG13252	Dmel_CG13252	0	0.307752	0.333333	0.5	0.235501
Socs16D	Dmel_CG8146	0	0.307742	0.333333	0.5	0.235494
gpp	Dmel_CG42803	0	0.30768	0.333333	0.5	0.235445
KrT95D	Dmel_CG5405	0	0.307328	0.333333	0.5	0.235169
put	Dmel_CG7904	0	0.307309	0.333333	0.5	0.235154
CalpB	Dmel_CG8107	0	0.307256	0.333333	0.5	0.235112
Cdc42	Dmel_CG12530	0	0.307173	0.333333	0.5	0.235047
MRP	Dmel_CG6214	0	0.306887	0.333333	0.5	0.234823
Rala	Dmel_CG2849	0	0.306846	0.333333	0.5	0.234791
CG7546	Dmel_CG7546	0	0.30674	0.333333	0.5	0.234708
Mlf	Dmel_CG8295	0	0.306382	0.333333	0.5	0.234427
CG8671	Dmel_CG8671	0	0.306146	0.333333	0.5	0.234242
sbr	Dmel_CG1664	0	0.305948	0.333333	0.5	0.234088
sws	Dmel_CG2212	0	0.305657	0.333333	0.5	0.23386
CG3558	Dmel_CG3558	0	0.305604	0.333333	0.5	0.233819
Khc	Dmel_CG7765	0	0.305528	0.333333	0.5	0.233759
Pka-R2	Dmel_CG15862	0	0.305523	0.333333	0.5	0.233755
mld	Dmel_CG34100	0	0.305508	0.333333	0.5	0.233744
RN-tre	Dmel_CG8085	0	0.305378	0.333333	0.5	0.233642
wgn	Dmel_CG6531	0	0.305343	0.333333	0.5	0.233615
CG9467	Dmel_CG9467	0	0.305276	0.333333	0.5	0.233562
hyd	Dmel_CG9484	0	0.305047	0.333333	0.5	0.233384
pros	Dmel_CG17228	0	0.304907	0.333333	0.5	0.233274
olf186-F	Dmel_CG11430	0	0.304402	0.333333	0.5	0.232881
CG1814	Dmel_CG1814	0	0.304341	0.333333	0.5	0.232833
CG7510	Dmel_CG7510	0	0.304256	0.333333	0.5	0.232767
Sra-1	Dmel_CG4931	0	0.304082	0.333333	0.5	0.232631
Dyrk3	Dmel_CG40478	-1	0.304077	0.315789	0.5	0.232627
Fs(2)Ket	Dmel_CG2637	0	0.30391	0.315789	0.5	0.232497
CG5742	Dmel_CG5742	0	0.303832	0.315789	0.5	0.232437
pr-set7	Dmel_CG3307	0	0.303697	0.315789	0.5	0.232332
Cul-4	Dmel_CG8711	0	0.303693	0.315789	0.5	0.232329
CG13604	Dmel_CG13604	0	0.303582	0.315789	0.5	0.232242
Cct1	Dmel_CG1049	0	0.303568	0.315789	0.5	0.232231
ZnT63C	Dmel_CG17723	0	0.303486	0.315789	0.5	0.232168
Lmpt	Dmel_CG42679	0	0.302998	0.315789	0.5	0.231788
ab	Dmel_CG4807	0	0.302916	0.315789	0.5	0.231725
l(1)G0269	Dmel_CG1696	0	0.302881	0.315789	0.5	0.231697
pnut	Dmel_CG8705	0	0.302602	0.315789	0.5	0.231481
CG11178	Dmel_CG11178	0	0.302597	0.315789	0.5	0.231477
CG11486	Dmel_CG11486	0	0.302301	0.315789	0.5	0.231247
CG13917	Dmel_CG13917	0	0.302295	0.315789	0.5	0.231243
qkr54B	Dmel_CG4816	0	0.302176	0.315789	0.5	0.231151
nes	Dmel_CG9655	0	0.302096	0.315789	0.5	0.231088
l(2)gl	Dmel_CG2671	0	0.30203	0.315789	0.5	0.231037
CG33298	Dmel_CG33298	0	0.302013	0.315789	0.5	0.231024
Herp	Dmel_CG14536	0	0.301701	0.315789	0.5	0.230782
S6kII	Dmel_CG17596	0	0.301597	0.315789	0.5	0.230702
CG6340	Dmel_CG6340	0	0.301562	0.315789	0.5	0.230675
drl	Dmel_CG17348	0	0.301553	0.315789	0.5	0.230668
Klp98A	Dmel_CG5658	0	0.301438	0.315789	0.5	0.230579
Pka-C3	Dmel_CG6117	0	0.301259	0.315789	0.5	0.23044
Pep	Dmel_CG6143	0	0.301253	0.315789	0.5	0.230436
CG31522	Dmel_CG31522	0	0.301138	0.315789	0.5	0.230347
EcR	Dmel_CG1765	0	0.301123	0.315789	0.5	0.230335
Ras85D	Dmel_CG9375	0	0.301035	0.315789	0.5	0.230267
schlank	Dmel_CG3576	0	0.300938	0.315789	0.5	0.230192
Fhos	Dmel_CG42610	0	0.300888	0.315789	0.5	0.230154
cnc	Dmel_CG17894	0	0.300818	0.315789	0.5	0.230099
CG9328	Dmel_CG9328	0	0.300622	0.315789	0.5	0.229948
sax	Dmel_CG1891	0	0.300536	0.315789	0.5	0.229882
th	Dmel_CG12284	0	0.300119	0.315789	0.5	0.22956
CG14883	Dmel_CG14883	0	0.300075	0.315789	0.5	0.229526
CG8909	Dmel_CG8909	0	0.300068	0.315789	0.5	0.22952
CG5445	Dmel_CG5445	0	0.300001	0.315789	0.5	0.229469
CG1553	Dmel_CG1553	0	0.299539	0.315789	0.5	0.229113
Oatp30B	Dmel_CG3811	0	0.299274	0.315789	0.5	0.228908
CG17360	Dmel_CG17360	0	0.298939	0.315789	0.5	0.228651
CG42533	Dmel_CG42533	0	0.298769	0.315789	0.5	0.22852
CG42671	Dmel_CG42671	0	0.298635	0.315789	0.5	0.228417
CG3556	Dmel_CG3556	0	0.298316	0.315789	0.5	0.228172
alph	Dmel_CG1906	0	0.298087	0.315789	0.5	0.227996
Mes2	Dmel_CG11100	0	0.297451	0.315789	0.5	0.227508
CG8408	Dmel_CG8408	0	0.297389	0.315789	0.5	0.22746
qkr58E-2	Dmel_CG5821	0	0.297368	0.315789	0.5	0.227444
raw	Dmel_CG12437	0	0.297147	0.315789	0.5	0.227275
nahoda	Dmel_CG12781	0	0.296906	0.315789	0.5	0.22709
tok	Dmel_CG6863	0	0.296896	0.315789	0.5	0.227083
CG31342	Dmel_CG31342	0	0.296786	0.315789	0.5	0.226998
CG7766	Dmel_CG7766	0	0.296586	0.315789	0.5	0.226845
CG34360	Dmel_CG34360	0	0.296394	0.315789	0.5	0.226699
sr	Dmel_CG7847	0	0.296329	0.315789	0.5	0.226649
nvy	Dmel_CG3385	0	0.296075	0.315789	0.5	0.226455
brm	Dmel_CG5942	0	0.296038	0.315789	0.5	0.226426
siz	Dmel_CG32434	0	0.295948	0.315789	0.5	0.226358
chico	Dmel_CG5686	0	0.295898	0.315789	0.5	0.22632
CG8578	Dmel_CG8578	0	0.295718	0.315789	0.5	0.226182
phol	Dmel_CG3445	0	0.295695	0.315789	0.5	0.226164
CG9009	Dmel_CG9009	0	0.295535	0.315789	0.5	0.226042
tho2	Dmel_CG31671	0	0.295534	0.315789	0.5	0.226042
CG3308	Dmel_CG3308	0	0.295499	0.315789	0.5	0.226015
CG15771	Dmel_CG15771	0	0.295491	0.315789	0.5	0.226009
Fem-1	Dmel_CG9025	0	0.295491	0.315789	0.5	0.226009
scaf6	Dmel_CG33522	0	0.295429	0.315789	0.5	0.225961
dia	Dmel_CG1768	0	0.295417	0.315789	0.5	0.225952
Bili	Dmel_CG11848	0	0.295416	0.315789	0.5	0.225952
c11.1	Dmel_CG12132	0	0.295383	0.315789	0.5	0.225926
PTP-ER	Dmel_CG9856	0	0.295079	0.315789	0.5	0.225695
CG8034	Dmel_CG8034	0	0.295023	0.315789	0.5	0.225652
Syx7	Dmel_CG5081	0	0.294937	0.315789	0.5	0.225586
CG5073	Dmel_CG5073	0	0.294717	0.315789	0.5	0.225419
rok	Dmel_CG9774	0	0.29464	0.315789	0.5	0.22536
CG9003	Dmel_CG9003	0	0.294619	0.315789	0.5	0.225344
CG12207	Dmel_CG12207	0	0.294561	0.315789	0.5	0.2253
Chd1	Dmel_CG3733	0	0.294535	0.315789	0.5	0.22528
Fur2	Dmel_CG18734	0	0.294444	0.315789	0.5	0.225211
CG1407	Dmel_CG1407	0	0.294223	0.315789	0.5	0.225043
cac	Dmel_CG1522	0	0.293749	0.315789	0.5	0.224682
CG17841	Dmel_CG17841	0	0.293418	0.315789	0.5	0.224431
CG11357	Dmel_CG11357	0	0.293344	0.315789	0.5	0.224375
neur	Dmel_CG11988	0	0.293152	0.315789	0.5	0.224229
wkd	Dmel_CG5344	0	0.29312	0.315789	0.5	0.224205
l(2)k05819	Dmel_CG3054	0	0.292969	0.315789	0.5	0.22409
CG13384	Dmel_CG13384	0	0.292907	0.315789	0.5	0.224043
CG10915	Dmel_CG10915	0	0.292526	0.315789	0.5	0.223754
dom	Dmel_CG9696	0	0.292452	0.315789	0.5	0.223698
qm	Dmel_CG8593	0	0.292432	0.315789	0.5	0.223683
Bx	Dmel_CG6500	0	0.292338	0.315789	0.5	0.223612
Pabp2	Dmel_CG2163	0	0.292262	0.315789	0.5	0.223554
plexA	Dmel_CG11081	0	0.292058	0.315789	0.5	0.2234
ari-2	Dmel_CG5709	0	0.291892	0.315789	0.5	0.223274
CG31550	Dmel_CG31550	0	0.291892	0.315789	0.5	0.223274
CG10737	Dmel_CG10737	0	0.291838	0.315789	0.5	0.223234
Src64B	Dmel_CG7524	0	0.291777	0.315789	0.5	0.223187
Atg13	Dmel_CG7331	0	0.29172	0.315789	0.5	0.223144
Bap	Dmel_CG12532	0	0.291634	0.315789	0.5	0.223079
Trc8	Dmel_CG2304	0	0.29144	0.315789	0.5	0.222933
akirin	Dmel_CG8580	0	0.29104	0.315789	0.5	0.222631
htl	Dmel_CG7223	0	0.291006	0.315789	0.5	0.222605
Atg2	Dmel_CG1241	0	0.290883	0.315789	0.5	0.222512
Socs36E	Dmel_CG15154	0	0.290563	0.315789	0.5	0.222271
l(2)gd1	Dmel_CG4713	0	0.290489	0.315789	0.5	0.222215
CG32138	Dmel_CG32138	0	0.290424	0.315789	0.5	0.222166
CG11857	Dmel_CG11857	0	0.290415	0.315789	0.5	0.222159
CYLD	Dmel_CG5603	0	0.290402	0.315789	0.5	0.222149
unc-119	Dmel_CG1659	0	0.290347	0.315789	0.5	0.222108
CG8230	Dmel_CG8230	0	0.290286	0.315789	0.5	0.222062
CG16718	Dmel_CG16718	0	0.290083	0.315789	0.5	0.221909
GlcAT-S	Dmel_CG3881	0	0.290023	0.315789	0.5	0.221864
Sep4	Dmel_CG9699	0	0.29	0.315789	0.5	0.221846
CG31731	Dmel_CG31731	0	0.289672	0.315789	0.5	0.221599
CG33095	Dmel_CG33095	0	0.289658	0.315789	0.5	0.221589
bnb	Dmel_CG7088	0	0.289639	0.315789	0.5	0.221575
Snap24	Dmel_CG9474	0	0.289395	0.315789	0.5	0.221391
Rab3	Dmel_CG7576	0	0.28923	0.315789	0.5	0.221267
CG8547	Dmel_CG8547	0	0.289202	0.315789	0.5	0.221246
stv	Dmel_CG32130	0	0.288996	0.315789	0.5	0.221091
cnk	Dmel_CG6556	0	0.288966	0.315789	0.5	0.221069
Dys	Dmel_CG34157	0	0.288817	0.315789	0.5	0.220957
sec24	Dmel_CG1472	0	0.28871	0.315789	0.5	0.220877
Lasp	Dmel_CG3849	0	0.28868	0.315789	0.5	0.220854
CG3125	Dmel_CG3125	0	0.288663	0.315789	0.5	0.220841
Eip63F-1	Dmel_CG15855	0	0.288458	0.315789	0.5	0.220687
MBD-R2	Dmel_CG10042	0	0.288394	0.315789	0.5	0.220639
CG7139	Dmel_CG7139	0	0.288374	0.315789	0.5	0.220624
Vps13	Dmel_CG2093	0	0.28826	0.315789	0.5	0.220539
bbc	Dmel_CG6016	0	0.288167	0.315789	0.5	0.220469
CG18769	Dmel_CG18769	0	0.287794	0.315789	0.5	0.22019
PhKgamma	Dmel_CG1830	0	0.28754	0.315789	0.5	0.219999
vari	Dmel_CG9326	0	0.287481	0.315789	0.5	0.219955
CG5191	Dmel_CG5191	0	0.287449	0.315789	0.5	0.219931
CG7192	Dmel_CG7192	0	0.287159	0.315789	0.5	0.219714
CG7492	Dmel_CG7492	0	0.286782	0.315789	0.5	0.219433
toy	Dmel_CG11186	0	0.286775	0.315789	0.5	0.219427
nej	Dmel_CG15319	0	0.286508	0.315789	0.5	0.219228
CG8949	Dmel_CG8949	0	0.286474	0.315789	0.5	0.219203
pyr	Dmel_CG13194	0	0.286462	0.315789	0.5	0.219194
CG12099	Dmel_CG12099	0	0.286304	0.315789	0.5	0.219076
CG7597	Dmel_CG7597	0	0.286296	0.315789	0.5	0.21907
Trf2	Dmel_CG18009	0	0.286132	0.315789	0.5	0.218947
nrv3	Dmel_CG8663	0	0.285565	0.315789	0.5	0.218525
CG8668	Dmel_CG8668	0	0.285482	0.315789	0.5	0.218463
Tango1	Dmel_CG11098	0	0.285327	0.315789	0.5	0.218347
Cdk5alpha	Dmel_CG5387	0	0.285304	0.315789	0.5	0.21833
CG42575	Dmel_CG42575	0	0.285215	0.315789	0.5	0.218264
grn	Dmel_CG9656	0	0.285147	0.315789	0.5	0.218213
Ef1alpha48D	Dmel_CG8280	0	0.284396	0.315789	0.5	0.217655
CG31739	Dmel_CG31739	0	0.284278	0.315789	0.5	0.217567
CG33521	Dmel_CG33521	0	0.284159	0.315789	0.5	0.217479
ppa	Dmel_CG9952	0	0.284115	0.315789	0.5	0.217446
CG42613	Dmel_CG42613	0	0.28393	0.315789	0.5	0.217309
CG5316	Dmel_CG5316	0	0.283877	0.315789	0.5	0.21727
CG13907	Dmel_CG13907	0	0.283876	0.315789	0.5	0.217269
UBL3	Dmel_CG9038	0	0.283846	0.315789	0.5	0.217247
gig	Dmel_CG6975	0	0.283799	0.315789	0.5	0.217212
CG3626	Dmel_CG3626	0	0.283756	0.315789	0.5	0.21718
RhoGAPp190	Dmel_CG32555	0	0.283589	0.315789	0.5	0.217056
foxo	Dmel_CG3143	0	0.283534	0.315789	0.5	0.217016
CG10960	Dmel_CG10960	0	0.283531	0.315789	0.5	0.217013
Rab40	Dmel_CG1900	0	0.283522	0.315789	0.5	0.217007
CG7852	Dmel_CG7852	0	0.283386	0.315789	0.5	0.216906
Drep-4	Dmel_CG9414	0	0.28335	0.315789	0.5	0.216879
wnd	Dmel_CG8789	0	0.283343	0.315789	0.5	0.216874
poe	Dmel_CG14472	0	0.28334	0.315789	0.5	0.216872
Hem	Dmel_CG5837	0	0.282998	0.315789	0.5	0.216619
l(3)05822	Dmel_CG7129	0	0.282872	0.315789	0.5	0.216525
eIF-4a	Dmel_CG9075	0	0.28283	0.315789	0.5	0.216494
Tpr2	Dmel_CG4599	0	0.282656	0.315789	0.5	0.216365
Ace	Dmel_CG17907	0	0.282653	0.315789	0.5	0.216363
sda	Dmel_CG5518	0	0.282587	0.315789	0.5	0.216314
Pect	Dmel_CG5547	0	0.282543	0.315789	0.5	0.216282
Dp	Dmel_CG4654	0	0.282438	0.315789	0.5	0.216204
CG8177	Dmel_CG8177	0	0.282372	0.315789	0.5	0.216155
Cul-3	Dmel_CG42616	0	0.282343	0.315789	0.5	0.216134
Rbp1-like	Dmel_CG1987	0	0.282142	0.315789	0.5	0.215986
alpha-Man-IIb	Dmel_CG4606	0	0.282089	0.315789	0.5	0.215946
cib	Dmel_CG4944	0	0.282068	0.315789	0.5	0.215931
Su(H)	Dmel_CG3497	0	0.28184	0.315789	0.5	0.215763
CG11883	Dmel_CG11883	0	0.281829	0.315789	0.5	0.215754
Gli	Dmel_CG3903	0	0.281143	0.315789	0.5	0.215249
Sfmbt	Dmel_CG16975	0	0.281097	0.315789	0.5	0.215215
HLH106	Dmel_CG8522	0	0.281061	0.315789	0.5	0.215188
skf	Dmel_CG30021	0	0.281032	0.315789	0.5	0.215167
CG32066	Dmel_CG32066	0	0.280939	0.315789	0.5	0.215098
CG12024	Dmel_CG12024	0	0.280864	0.315789	0.5	0.215043
CG9005	Dmel_CG9005	0	0.280817	0.315789	0.5	0.215008
Mpcp	Dmel_CG4994	0	0.280531	0.315789	0.5	0.214798
ttv	Dmel_CG10117	-1	0.280431	0.3	0.5	0.214724
cact	Dmel_CG5848	0	0.280378	0.3	0.5	0.214685
Gs2	Dmel_CG1743	0	0.280098	0.3	0.5	0.21448
CG42684	Dmel_CG42684	0	0.280062	0.3	0.5	0.214453
CG32813	Dmel_CG32813	0	0.28003	0.3	0.5	0.21443
CanB	Dmel_CG4209	0	0.279999	0.3	0.5	0.214407
h	Dmel_CG6494	0	0.279869	0.3	0.5	0.214311
CG4996	Dmel_CG4996	0	0.279866	0.3	0.5	0.214309
Klp31E	Dmel_CG5300	0	0.27985	0.3	0.5	0.214297
CG14764	Dmel_CG14764	0	0.279614	0.3	0.5	0.214124
Hsc70-4	Dmel_CG4264	0	0.279585	0.3	0.5	0.214103
ci	Dmel_CG2125	0	0.279234	0.3	0.5	0.213845
Sox102F	Dmel_CG11153	0	0.279152	0.3	0.5	0.213785
Sos	Dmel_CG7793	0	0.27912	0.3	0.5	0.213762
CG3967	Dmel_CG3967	0	0.278973	0.3	0.5	0.213654
spas	Dmel_CG5977	0	0.278642	0.3	0.5	0.213411
Xbp1	Dmel_CG9415	0	0.278619	0.3	0.5	0.213395
pho	Dmel_CG17743	0	0.278409	0.3	0.5	0.213241
dx	Dmel_CG3929	0	0.277887	0.3	0.5	0.212859
CG4294	Dmel_CG4294	0	0.277788	0.3	0.5	0.212787
LanA	Dmel_CG10236	0	0.277753	0.3	0.5	0.212761
Mrtf	Dmel_CG32296	0	0.277258	0.3	0.5	0.2124
tth	Dmel_CG12175	0	0.27721	0.3	0.5	0.212365
CG11873	Dmel_CG11873	0	0.277164	0.3	0.5	0.212331
Rac2	Dmel_CG8556	0	0.277048	0.3	0.5	0.212247
Gie	Dmel_CG7891	0	0.277027	0.3	0.5	0.212231
ca	Dmel_CG31037	0	0.276997	0.3	0.5	0.212209
SNF4Agamma	Dmel_CG17299	0	0.276805	0.3	0.5	0.212069
oaf	Dmel_CG9884	0	0.276805	0.3	0.5	0.212069
CG11658	Dmel_CG11658	0	0.276703	0.3	0.5	0.211995
CG8552	Dmel_CG8552	0	0.276576	0.3	0.5	0.211903
CG7332	Dmel_CG7332	0	0.276559	0.3	0.5	0.21189
sgl	Dmel_CG10072	0	0.276512	0.3	0.5	0.211856
LanB2	Dmel_CG3322	0	0.276145	0.3	0.5	0.211589
Dr	Dmel_CG1897	0	0.275962	0.3	0.5	0.211456
CG42788	Dmel_CG42788	0	0.275908	0.3	0.5	0.211416
CG9132	Dmel_CG9132	0	0.275766	0.3	0.5	0.211313
CG5149	Dmel_CG5149	0	0.27575	0.3	0.5	0.211301
AP-1gamma	Dmel_CG9113	0	0.275658	0.3	0.5	0.211235
CG2765	Dmel_CG2765	0	0.275655	0.3	0.5	0.211232
CG32676	Dmel_CG32676	0	0.275463	0.3	0.5	0.211093
VhaSFD	Dmel_CG17332	0	0.275456	0.3	0.5	0.211088
Atet	Dmel_CG2969	0	0.275259	0.3	0.5	0.210945
CG3563	Dmel_CG3563	0	0.275244	0.3	0.5	0.210934
CG10417	Dmel_CG10417	0	0.275143	0.3	0.5	0.210861
lark	Dmel_CG8597	0	0.275062	0.3	0.5	0.210802
CG11299	Dmel_CG11299	0	0.274955	0.3	0.5	0.210724
CG7781	Dmel_CG7781	0	0.274776	0.3	0.5	0.210594
sfl	Dmel_CG8339	0	0.274449	0.3	0.5	0.210357
XNP	Dmel_CG4548	0	0.274305	0.3	0.5	0.210253
RhoGDI	Dmel_CG7823	0	0.273915	0.3	0.5	0.209971
bab2	Dmel_CG9102	0	0.273729	0.3	0.5	0.209836
CG14650	Dmel_CG14650	0	0.273703	0.3	0.5	0.209817
cbt	Dmel_CG4427	0	0.273562	0.3	0.5	0.209715
CG42863	Dmel_CG42863	0	0.273491	0.3	0.5	0.209664
CG1657	Dmel_CG1657	0	0.27339	0.3	0.5	0.209591
Clic	Dmel_CG10997	0	0.273129	0.3	0.5	0.209402
gol	Dmel_CG2679	0	0.27275	0.3	0.5	0.209129
NUCB1	Dmel_CG32190	0	0.272599	0.3	0.5	0.20902
CG2269	Dmel_CG2269	0	0.272584	0.3	0.5	0.209009
sowah	Dmel_CG10632	0	0.272314	0.3	0.5	0.208814
comt	Dmel_CG1618	0	0.272188	0.3	0.5	0.208724
His3.3B	Dmel_CG8989	0	0.272076	0.3	0.5	0.208643
sec31	Dmel_CG8266	0	0.271881	0.3	0.5	0.208503
CG32528	Dmel_CG32528	0	0.271735	0.3	0.5	0.208398
CG2698	Dmel_CG2698	0	0.271364	0.3	0.5	0.208131
pcs	Dmel_CG7761	0	0.271192	0.3	0.5	0.208007
sec71	Dmel_CG7578	0	0.271175	0.3	0.5	0.207995
vn	Dmel_CG10491	0	0.271152	0.3	0.5	0.207978
BRWD3	Dmel_CG31132	0	0.271033	0.3	0.5	0.207893
arr	Dmel_CG5912	0	0.270964	0.3	0.5	0.207843
Dscam	Dmel_CG17800	0	0.270809	0.3	0.5	0.207732
VhaAC39	Dmel_CG2934	0	0.270709	0.3	0.5	0.20766
CG12163	Dmel_CG12163	0	0.270682	0.3	0.5	0.207641
CG33232	Dmel_CG33232	0	0.270678	0.3	0.5	0.207638
Sec16	Dmel_CG32654	0	0.270603	0.3	0.5	0.207584
Hel89B	Dmel_CG4261	0	0.27052	0.3	0.5	0.207525
CG6791	Dmel_CG6791	0	0.270474	0.3	0.5	0.207492
Nmda1	Dmel_CG3798	0	0.270461	0.3	0.5	0.207482
CG8405	Dmel_CG8405	0	0.270447	0.3	0.5	0.207472
CG4658	Dmel_CG4658	0	0.27033	0.3	0.5	0.207388
LpR2	Dmel_CG31092	0	0.270092	0.3	0.5	0.207218
CG6959	Dmel_CG6959	0	0.269993	0.3	0.5	0.207147
CG30463	Dmel_CG30463	0	0.269758	0.3	0.5	0.206978
Sara	Dmel_CG15667	0	0.269587	0.3	0.5	0.206856
desat1	Dmel_CG5887	0	0.269485	0.3	0.5	0.206783
casp	Dmel_CG8400	0	0.269466	0.3	0.5	0.206769
CG31999	Dmel_CG31999	0	0.269263	0.3	0.5	0.206624
msl-2	Dmel_CG3241	0	0.26918	0.3	0.5	0.206565
ed	Dmel_CG12676	0	0.269163	0.3	0.5	0.206553
YT521-B	Dmel_CG12076	0	0.269086	0.3	0.5	0.206498
simj	Dmel_CG32067	0	0.269065	0.3	0.5	0.206483
zf30C	Dmel_CG3998	0	0.269007	0.3	0.5	0.206441
CG5720	Dmel_CG5720	0	0.26895	0.3	0.5	0.206401
CG17912	Dmel_CG17912	0	0.268774	0.3	0.5	0.206275
Eip93F	Dmel_CG18389	0	0.268564	0.3	0.5	0.206125
stmA	Dmel_CG8739	0	0.268431	0.3	0.5	0.20603
Dcr-2	Dmel_CG6493	0	0.268083	0.3	0.5	0.205782
Elf	Dmel_CG6382	0	0.268076	0.3	0.5	0.205777
NaCP60E	Dmel_CG34405	0	0.267888	0.3	0.5	0.205643
CG1812	Dmel_CG1812	0	0.267852	0.3	0.5	0.205617
CG14562	Dmel_CG14562	0	0.267843	0.3	0.5	0.205611
CG5065	Dmel_CG5065	0	0.267818	0.3	0.5	0.205593
SA	Dmel_CG3423	0	0.267782	0.3	0.5	0.205567
Cdk5	Dmel_CG8203	0	0.267238	0.3	0.5	0.20518
msk	Dmel_CG7935	0	0.267097	0.3	0.5	0.20508
tau	Dmel_CG31057	0	0.266755	0.3	0.5	0.204837
Sox21b	Dmel_CG32139	0	0.266677	0.3	0.5	0.204781
CG6406	Dmel_CG6406	0	0.266676	0.3	0.5	0.20478
woc	Dmel_CG5965	0	0.266605	0.3	0.5	0.20473
CG10990	Dmel_CG10990	0	0.266421	0.3	0.5	0.204599
Ptp69D	Dmel_CG10975	0	0.266299	0.3	0.5	0.204513
vvl	Dmel_CG10037	0	0.266012	0.3	0.5	0.204309
wts	Dmel_CG12072	0	0.266007	0.3	0.5	0.204306
CG1646	Dmel_CG1646	0	0.265473	0.3	0.5	0.203927
kibra	Dmel_CG33967	0	0.265464	0.3	0.5	0.203921
stj	Dmel_CG12295	0	0.265419	0.3	0.5	0.203889
BCL7-like	Dmel_CG17252	0	0.265266	0.3	0.5	0.203781
Hsf	Dmel_CG5748	0	0.265235	0.3	0.5	0.203759
Klp68D	Dmel_CG7293	0	0.264918	0.3	0.5	0.203535
Cap-H2	Dmel_CG14685	0	0.2649	0.3	0.5	0.203522
CG3800	Dmel_CG3800	0	0.264884	0.3	0.5	0.20351
CG17233	Dmel_CG17233	0	0.264876	0.3	0.5	0.203505
CG11665	Dmel_CG11665	0	0.264782	0.3	0.5	0.203438
row	Dmel_CG8092	0	0.264735	0.3	0.5	0.203405
CG16833	Dmel_CG16833	-1	0.26459	0.285714	0.5	0.203303
cg	Dmel_CG8367	0	0.264461	0.285714	0.5	0.203212
MTA1-like	Dmel_CG2244	0	0.264458	0.285714	0.5	0.203209
Hrb87F	Dmel_CG12749	0	0.264311	0.285714	0.5	0.203106
Tob	Dmel_CG9214	0	0.26421	0.285714	0.5	0.203034
Hs6st	Dmel_CG4451	0	0.264116	0.285714	0.5	0.202968
C3G	Dmel_CG42328	0	0.264024	0.285714	0.5	0.202903
Alh	Dmel_CG1070	0	0.263968	0.285714	0.5	0.202864
mam	Dmel_CG8118	0	0.263935	0.285714	0.5	0.20284
CG11050	Dmel_CG11050	0	0.263862	0.285714	0.5	0.202789
kdn	Dmel_CG3861	0	0.2638	0.285714	0.5	0.202745
lin	Dmel_CG11770	0	0.263464	0.285714	0.5	0.202508
Saf-B	Dmel_CG6995	0	0.263448	0.285714	0.5	0.202497
Flo	Dmel_CG8200	0	0.263388	0.285714	0.5	0.202455
Crk	Dmel_CG1587	0	0.26316	0.285714	0.5	0.202294
Ark	Dmel_CG6829	0	0.263118	0.285714	0.5	0.202265
Cbp80	Dmel_CG7035	0	0.262393	0.285714	0.5	0.201755
CG8602	Dmel_CG8602	0	0.262391	0.285714	0.5	0.201753
CG6114	Dmel_CG6114	0	0.261957	0.285714	0.5	0.201449
Fas2	Dmel_CG3665	0	0.26166	0.285714	0.5	0.20124
CG33330	Dmel_CG33330	0	0.261585	0.285714	0.5	0.201188
Atf-2	Dmel_CG30420	0	0.261442	0.285714	0.5	0.201088
Cnx99A	Dmel_CG11958	0	0.261012	0.285714	0.5	0.200786
CG11760	Dmel_CG11760	0	0.260793	0.285714	0.5	0.200633
inx3	Dmel_CG1448	0	0.260788	0.285714	0.5	0.20063
DIP1	Dmel_CG17686	0	0.260787	0.285714	0.5	0.200629
klu	Dmel_CG12296	0	0.260358	0.285714	0.5	0.200329
Tret1-1	Dmel_CG30035	0	0.26033	0.285714	0.5	0.200309
Jupiter	Dmel_CG31363	0	0.260175	0.285714	0.5	0.200201
bel	Dmel_CG9748	0	0.260018	0.285714	0.5	0.200092
CG4030	Dmel_CG4030	0	0.259994	0.285714	0.5	0.200075
CG32685	Dmel_CG32685	0	0.259994	0.285714	0.5	0.200075
CG6498	Dmel_CG6498	-1	0.259843	0.28125	0.5	0.199969
ap	Dmel_CG8376	0	0.259766	0.28125	0.5	0.199916
SNF1A	Dmel_CG3051	0	0.259688	0.28125	0.5	0.199861
Dhc64C	Dmel_CG7507	0	0.259665	0.28125	0.5	0.199845
CG14646	Dmel_CG14646	0	0.259543	0.28125	0.5	0.19976
MP1	Dmel_CG1102	0	0.259441	0.28125	0.5	0.199689
CG33144	Dmel_CG33144	0	0.259046	0.28125	0.5	0.199414
CG11388	Dmel_CG11388	0	0.259016	0.28125	0.5	0.199393
CG11791	Dmel_CG11791	0	0.25901	0.28125	0.5	0.199389
flower	Dmel_CG6151	0	0.258886	0.28125	0.5	0.199302
Snoo	Dmel_CG34421	0	0.258846	0.28125	0.5	0.199275
CG12402	Dmel_CG12402	0	0.25877	0.28125	0.5	0.199222
Pez	Dmel_CG9493	0	0.258522	0.28125	0.5	0.199049
CG5315	Dmel_CG5315	0	0.258229	0.28125	0.5	0.198845
ras	Dmel_CG1799	0	0.258131	0.28125	0.5	0.198777
NfI	Dmel_CG2380	0	0.25804	0.28125	0.5	0.198714
CG6043	Dmel_CG6043	0	0.258035	0.28125	0.5	0.198711
CG11593	Dmel_CG11593	0	0.257975	0.28125	0.5	0.198669
MICAL-like	Dmel_CG11259	0	0.257672	0.28125	0.5	0.198459
opa1-like	Dmel_CG8479	0	0.257667	0.28125	0.5	0.198455
CG1909	Dmel_CG1909	0	0.25765	0.28125	0.5	0.198443
ImpL2	Dmel_CG15009	0	0.25764	0.28125	0.5	0.198436
CG42673	Dmel_CG42673	0	0.257143	0.28125	0.5	0.198092
eIF3-S9	Dmel_CG4878	0	0.256942	0.28125	0.5	0.197953
jar	Dmel_CG5695	0	0.256902	0.28125	0.5	0.197925
CG3198	Dmel_CG3198	0	0.256659	0.28125	0.5	0.197757
nct	Dmel_CG7012	0	0.256566	0.28125	0.5	0.197692
Suv4-20	Dmel_CG13363	0	0.256509	0.28125	0.5	0.197653
Pcf11	Dmel_CG10228	0	0.256396	0.28125	0.5	0.197575
CG1640	Dmel_CG1640	0	0.256368	0.28125	0.5	0.197555
pzg	Dmel_CG7752	0	0.256285	0.28125	0.5	0.197498
CG1962	Dmel_CG1962	0	0.256241	0.28125	0.5	0.197468
Srp54	Dmel_CG4602	0	0.25618	0.28125	0.5	0.197425
CG2924	Dmel_CG2924	0	0.25612	0.28125	0.5	0.197384
chif	Dmel_CG5813	0	0.256108	0.28125	0.5	0.197376
Fatp	Dmel_CG7400	0	0.25608	0.28125	0.5	0.197356
pgant2	Dmel_CG3254	0	0.256034	0.28125	0.5	0.197325
Atg18	Dmel_CG7986	0	0.255888	0.28125	0.5	0.197224
Rab10	Dmel_CG17060	0	0.255862	0.28125	0.5	0.197206
CG8944	Dmel_CG8944	0	0.255807	0.28125	0.5	0.197168
Nrx-1	Dmel_CG7050	0	0.255623	0.28125	0.5	0.197041
CG13900	Dmel_CG13900	0	0.255352	0.28125	0.5	0.196854
vri	Dmel_CG14029	0	0.255233	0.28125	0.5	0.196772
CG32666	Dmel_CG32666	0	0.25523	0.28125	0.5	0.19677
msl-1	Dmel_CG10385	0	0.255202	0.28125	0.5	0.19675
cenB1A	Dmel_CG6742	0	0.255072	0.28125	0.5	0.196661
CG10809	Dmel_CG10809	0	0.255	0.28125	0.5	0.196611
CG6091	Dmel_CG6091	0	0.254991	0.28125	0.5	0.196605
CG5674	Dmel_CG5674	0	0.254988	0.28125	0.5	0.196603
ck	Dmel_CG7595	0	0.254933	0.28125	0.5	0.196565
Ca-P60A	Dmel_CG3725	0	0.2547	0.28125	0.5	0.196404
CG8334	Dmel_CG8334	0	0.254677	0.28125	0.5	0.196389
CG6686	Dmel_CG6686	0	0.253753	0.28125	0.5	0.195753
CG14657	Dmel_CG14657	0	0.253479	0.28125	0.5	0.195565
CG11638	Dmel_CG11638	0	0.253141	0.28125	0.5	0.195333
Upf1	Dmel_CG1559	0	0.25283	0.28125	0.5	0.19512
CG12025	Dmel_CG12025	0	0.252811	0.28125	0.5	0.195107
Exp6	Dmel_CG3923	0	0.252777	0.28125	0.5	0.195084
rb	Dmel_CG11427	0	0.252736	0.28125	0.5	0.195056
fng	Dmel_CG10580	0	0.252678	0.28125	0.5	0.195016
CG2225	Dmel_CG2225	0	0.252646	0.28125	0.5	0.194994
Ced-12	Dmel_CG5336	0	0.252477	0.28125	0.5	0.194879
CG16940	Dmel_CG16940	0	0.252247	0.28125	0.5	0.194721
Ect4	Dmel_CG34373	0	0.251948	0.28125	0.5	0.194517
stumps	Dmel_CG31317	0	0.25181	0.28125	0.5	0.194422
mspo	Dmel_CG10145	0	0.251444	0.28125	0.5	0.194173
cno	Dmel_CG42312	0	0.251017	0.28125	0.5	0.193881
CG8029	Dmel_CG8029	0	0.251006	0.28125	0.5	0.193874
CG12576	Dmel_CG12576	0	0.250982	0.28125	0.5	0.193857
sprt	Dmel_CG30023	0	0.250921	0.28125	0.5	0.193816
Hcf	Dmel_CG1710	0	0.25091	0.28125	0.5	0.193808
Gs1	Dmel_CG2718	0	0.250657	0.28125	0.5	0.193636
l(1)G0193	Dmel_CG2206	0	0.250552	0.28125	0.5	0.193564
mav	Dmel_CG1901	0	0.250201	0.28125	0.5	0.193326
garz	Dmel_CG8487	0	0.250141	0.28125	0.5	0.193285
vib	Dmel_CG5269	0	0.250064	0.28125	0.5	0.193232
CG3632	Dmel_CG3632	0	0.24992	0.28125	0.5	0.193134
Rab14	Dmel_CG4212	0	0.249883	0.28125	0.5	0.193109
CG2950	Dmel_CG2950	0	0.249856	0.28125	0.5	0.193091
ago	Dmel_CG15010	0	0.249597	0.28125	0.5	0.192915
igl	Dmel_CG18285	0	0.249529	0.28125	0.5	0.192869
CG8289	Dmel_CG8289	0	0.249475	0.28125	0.5	0.192832
CG5273	Dmel_CG5273	0	0.249364	0.28125	0.5	0.192757
L	Dmel_CG10109	0	0.249339	0.28125	0.5	0.19274
Ars2	Dmel_CG7843	0	0.249147	0.28125	0.5	0.19261
CG4877	Dmel_CG4877	0	0.249072	0.28125	0.5	0.192559
Rtf1	Dmel_CG10955	0	0.24898	0.28125	0.5	0.192496
kel	Dmel_CG7210	0	0.248893	0.28125	0.5	0.192437
CG11360	Dmel_CG11360	0	0.248655	0.28125	0.5	0.192276
dl	Dmel_CG6667	0	0.248534	0.28125	0.5	0.192194
CG1344	Dmel_CG1344	0	0.248442	0.28125	0.5	0.192132
CG10283	Dmel_CG10283	0	0.248398	0.28125	0.5	0.192102
CG9715	Dmel_CG9715	0	0.248388	0.28125	0.5	0.192095
CG2201	Dmel_CG2201	0	0.248288	0.28125	0.5	0.192027
Rassf	Dmel_CG4656	0	0.248252	0.28125	0.5	0.192003
Nhe2	Dmel_CG9256	0	0.248228	0.28125	0.5	0.191987
Ppn	Dmel_CG33103	0	0.248215	0.28125	0.5	0.191978
CG31038	Dmel_CG31038	0	0.248167	0.28125	0.5	0.191946
Hydr2	Dmel_CG3488	0	0.248033	0.28125	0.5	0.191855
CG4577	Dmel_CG4577	0	0.247899	0.28125	0.5	0.191764
gho	Dmel_CG10882	0	0.2476	0.28125	0.5	0.191562
CG7158	Dmel_CG7158	0	0.247565	0.28125	0.5	0.191539
CG1578	Dmel_CG1578	0	0.247564	0.28125	0.5	0.191538
ergic53	Dmel_CG6822	0	0.247484	0.28125	0.5	0.191484
DAAM	Dmel_CG14622	0	0.247482	0.28125	0.5	0.191483
Rcd1	Dmel_CG8233	0	0.247353	0.28125	0.5	0.191395
Hip1	Dmel_CG10971	0	0.247215	0.28125	0.5	0.191302
cv	Dmel_CG12410	0	0.24718	0.28125	0.5	0.191279
RhoGAP100F	Dmel_CG1976	0	0.247169	0.28125	0.5	0.191271
CG32132	Dmel_CG32132	0	0.247121	0.28125	0.5	0.191239
btz	Dmel_CG12878	0	0.247065	0.28125	0.5	0.191201
CG9940	Dmel_CG9940	0	0.246872	0.28125	0.5	0.191071
alpha-Man-II	Dmel_CG18802	0	0.246836	0.28125	0.5	0.191047
caz	Dmel_CG3606	0	0.246626	0.28125	0.5	0.190905
CG10188	Dmel_CG10188	0	0.246616	0.28125	0.5	0.190898
RNaseX25	Dmel_CG8194	0	0.246529	0.28125	0.5	0.19084
Fas3	Dmel_CG5803	0	0.245929	0.28125	0.5	0.190436
Calx	Dmel_CG5685	0	0.245796	0.28125	0.5	0.190347
Arp14D	Dmel_CG9901	0	0.245786	0.28125	0.5	0.19034
CG3689	Dmel_CG3689	0	0.245647	0.28125	0.5	0.190246
CG4341	Dmel_CG4341	0	0.245594	0.28125	0.5	0.190211
CG31705	Dmel_CG31705	0	0.245498	0.28125	0.5	0.190146
CG11970	Dmel_CG11970	0	0.245235	0.28125	0.5	0.18997
Zyx102EF	Dmel_CG32018	0	0.245187	0.28125	0.5	0.189938
Moca-cyp	Dmel_CG1866	0	0.245132	0.28125	0.5	0.189901
CG5931	Dmel_CG5931	0	0.245108	0.28125	0.5	0.189885
CG4641	Dmel_CG4641	0	0.2451	0.28125	0.5	0.189879
CG3036	Dmel_CG3036	0	0.245082	0.28125	0.5	0.189867
CG4080	Dmel_CG4080	0	0.245058	0.28125	0.5	0.189851
slgA	Dmel_CG1417	0	0.244965	0.28125	0.5	0.189789
Tsp66E	Dmel_CG4999	0	0.244926	0.28125	0.5	0.189762
Rcd2	Dmel_CG4786	0	0.244887	0.28125	0.5	0.189736
CG8920	Dmel_CG8920	0	0.244866	0.28125	0.5	0.189722
CG9919	Dmel_CG9919	0	0.244812	0.28125	0.5	0.189686
CG3356	Dmel_CG3356	0	0.244577	0.28125	0.5	0.189528
CG10492	Dmel_CG10492	0	0.244446	0.28125	0.5	0.189441
Pu	Dmel_CG9441	0	0.244417	0.28125	0.5	0.189421
slpr	Dmel_CG2272	0	0.244109	0.28125	0.5	0.189215
CG5087	Dmel_CG5087	0	0.243979	0.28125	0.5	0.189128
PR2	Dmel_CG3969	0	0.243906	0.28125	0.5	0.189079
Zasp52	Dmel_CG30084	0	0.243718	0.28125	0.5	0.188954
gus	Dmel_CG2944	0	0.243598	0.28125	0.5	0.188873
CG8765	Dmel_CG8765	0	0.243526	0.28125	0.5	0.188825
Arp66B	Dmel_CG7558	0	0.24346	0.28125	0.5	0.188781
CG9063	Dmel_CG9063	0	0.243343	0.28125	0.5	0.188703
coro	Dmel_CG9446	0	0.243147	0.28125	0.5	0.188572
CG17078	Dmel_CG17078	0	0.242934	0.28125	0.5	0.18843
Paip2	Dmel_CG12358	0	0.242856	0.28125	0.5	0.188378
Fer2LCH	Dmel_CG1469	0	0.242787	0.28125	0.5	0.188332
CG33111	Dmel_CG33111	0	0.242592	0.28125	0.5	0.188202
eya	Dmel_CG9554	0	0.242565	0.28125	0.5	0.188184
CG5261	Dmel_CG5261	0	0.242554	0.28125	0.5	0.188177
CG32795	Dmel_CG32795	0	0.24253	0.28125	0.5	0.188161
CG10413	Dmel_CG10413	0	0.242491	0.28125	0.5	0.188135
Act5C	Dmel_CG4027	0	0.24244	0.28125	0.5	0.188101
klg	Dmel_CG6669	0	0.242301	0.28125	0.5	0.188008
CG3838	Dmel_CG3838	0	0.24213	0.28125	0.5	0.187894
CG11284	Dmel_CG11284	0	0.241959	0.28125	0.5	0.18778
Ncc69	Dmel_CG4357	0	0.241372	0.28125	0.5	0.18739
l(2)k09913	Dmel_CG3082	0	0.241214	0.28125	0.5	0.187285
kon	Dmel_CG10275	0	0.241095	0.28125	0.5	0.187206
CG3493	Dmel_CG3493	0	0.24101	0.28125	0.5	0.18715
CG3523	Dmel_CG3523	0	0.240964	0.28125	0.5	0.187119
UbcD2	Dmel_CG6720	0	0.240939	0.28125	0.5	0.187103
RhoGAP15B	Dmel_CG4937	0	0.24089	0.28125	0.5	0.18707
eIF3-S10	Dmel_CG9805	0	0.240857	0.28125	0.5	0.187048
CG7956	Dmel_CG7956	0	0.240832	0.28125	0.5	0.187032
CG10137	Dmel_CG10137	0	0.240627	0.28125	0.5	0.186896
Karybeta3	Dmel_CG1059	0	0.240426	0.28125	0.5	0.186763
SdhA	Dmel_CG17246	0	0.240362	0.28125	0.5	0.18672
cta	Dmel_CG17678	0	0.240318	0.28125	0.5	0.186691
Snap25	Dmel_CG40452	0	0.240279	0.28125	0.5	0.186665
Gprk1	Dmel_CG40129	0	0.240257	0.28125	0.5	0.186651
CG7115	Dmel_CG7115	0	0.240049	0.28125	0.5	0.186513
wds	Dmel_CG17437	-1	0.239955	0.28125	0.5	0.186451
CG32372	Dmel_CG32372	0	0.239791	0.28125	0.5	0.186342
CG12121	Dmel_CG12121	0	0.239589	0.28125	0.5	0.186209
Glt	Dmel_CG9280	0	0.239564	0.28125	0.5	0.186192
CG10984	Dmel_CG10984	0	0.239465	0.28125	0.5	0.186127
CG42593	Dmel_CG42593	0	0.23941	0.28125	0.5	0.186091
RhoBTB	Dmel_CG5701	0	0.239141	0.28125	0.5	0.185913
Vha16	Dmel_CG3161	0	0.238759	0.28125	0.5	0.185661
argos	Dmel_CG4531	0	0.238694	0.28125	0.5	0.185618
CG42268	Dmel_CG42268	0	0.238387	0.28125	0.5	0.185416
Gef26	Dmel_CG9491	0	0.238362	0.28125	0.5	0.185399
sl	Dmel_CG4200	0	0.238349	0.28125	0.5	0.185391
mRNA-capping-enzyme	Dmel_CG1810	0	0.238337	0.28125	0.5	0.185383
Uba1	Dmel_CG1782	0	0.238336	0.28125	0.5	0.185382
CycT	Dmel_CG6292	0	0.238231	0.28125	0.5	0.185313
cnn	Dmel_CG4832	0	0.23812	0.28125	0.5	0.18524
dik	Dmel_CG7098	0	0.237987	0.28125	0.5	0.185152
CG31324	Dmel_CG31324	0	0.23788	0.28125	0.5	0.185082
CG34408	Dmel_CG34408	0	0.237851	0.28125	0.5	0.185063
CG12290	Dmel_CG12290	0	0.237816	0.28125	0.5	0.18504
TyrR	Dmel_CG7485	0	0.23778	0.28125	0.5	0.185016
trr	Dmel_CG3848	0	0.237767	0.28125	0.5	0.185007
CG8600	Dmel_CG8600	0	0.237712	0.28125	0.5	0.184971
mAcR-60C	Dmel_CG4356	0	0.237671	0.28125	0.5	0.184944
Pax	Dmel_CG31794	0	0.237565	0.28125	0.5	0.184875
CG6838	Dmel_CG6838	0	0.237517	0.28125	0.5	0.184843
Irc	Dmel_CG8913	0	0.237492	0.28125	0.5	0.184827
CG6860	Dmel_CG6860	0	0.237424	0.28125	0.5	0.184782
CG8195	Dmel_CG8195	0	0.237272	0.28125	0.5	0.184682
CG18549	Dmel_CG18549	0	0.237215	0.28125	0.5	0.184645
Keap1	Dmel_CG3962	0	0.237197	0.28125	0.5	0.184633
CG42389	Dmel_CG42389	0	0.236935	0.28125	0.5	0.184461
Ih	Dmel_CG8585	0	0.236715	0.28125	0.5	0.184317
Letm1	Dmel_CG4589	0	0.23648	0.28125	0.5	0.184162
VAChT	Dmel_CG32848	0	0.236243	0.28125	0.5	0.184007
CG6357	Dmel_CG6357	0	0.236179	0.28125	0.5	0.183965
CG12084	Dmel_CG12084	0	0.236153	0.28125	0.5	0.183948
rdgC	Dmel_CG6571	0	0.236147	0.28125	0.5	0.183944
CG4822	Dmel_CG4822	0	0.236098	0.28125	0.5	0.183912
phtf	Dmel_CG3268	0	0.235981	0.28125	0.5	0.183836
CG7656	Dmel_CG7656	0	0.235638	0.28125	0.5	0.183611
CG32103	Dmel_CG32103	0	0.235461	0.28125	0.5	0.183496
Myo95E	Dmel_CG5501	0	0.235447	0.28125	0.5	0.183486
CG18292	Dmel_CG18292	0	0.235402	0.28125	0.5	0.183457
Itp-r83A	Dmel_CG1063	0	0.23535	0.28125	0.5	0.183423
vg	Dmel_CG3830	0	0.235344	0.28125	0.5	0.183419
CG34126	Dmel_CG34126	0	0.235182	0.28125	0.5	0.183313
dome	Dmel_CG14226	0	0.235067	0.28125	0.5	0.183238
Ras64B	Dmel_CG1167	0	0.235033	0.28125	0.5	0.183216
CG1427	Dmel_CG1427	0	0.234958	0.28125	0.5	0.183167
dpr18	Dmel_CG14948	0	0.234953	0.28125	0.5	0.183164
MED14	Dmel_CG12031	0	0.234919	0.28125	0.5	0.183142
Fie	Dmel_CG1079	0	0.234765	0.28125	0.5	0.183041
botv	Dmel_CG15110	0	0.234705	0.28125	0.5	0.183002
LRP1	Dmel_CG33087	0	0.234701	0.28125	0.5	0.182999
CG31678	Dmel_CG31678	0	0.234321	0.28125	0.5	0.182752
Myo31DF	Dmel_CG7438	0	0.234265	0.28125	0.5	0.182715
hpo	Dmel_CG11228	0	0.23422	0.28125	0.5	0.182686
salm	Dmel_CG6464	0	0.234061	0.28125	0.5	0.182582
RpL22	Dmel_CG7434	0	0.233908	0.28125	0.5	0.182483
CG17321	Dmel_CG17321	0	0.233794	0.28125	0.5	0.182409
E(Pc)	Dmel_CG7776	0	0.233791	0.28125	0.5	0.182407
Mmp2	Dmel_CG1794	0	0.233753	0.28125	0.5	0.182382
Best1	Dmel_CG6264	0	0.233734	0.28125	0.5	0.18237
aru	Dmel_CG4276	0	0.233691	0.28125	0.5	0.182342
CG30115	Dmel_CG30115	0	0.233621	0.28125	0.5	0.182296
CG32016	Dmel_CG32016	0	0.23362	0.28125	0.5	0.182295
CG8516	Dmel_CG8516	0	0.233421	0.28125	0.5	0.182166
Ubqn	Dmel_CG14224	0	0.233085	0.28125	0.5	0.181948
Df31	Dmel_CG2207	0	0.232842	0.28125	0.5	0.18179
bin3	Dmel_CG8276	0	0.232832	0.28125	0.5	0.181784
CG5151	Dmel_CG5151	0	0.232754	0.28125	0.5	0.181733
pes	Dmel_CG7228	0	0.232754	0.28125	0.5	0.181733
CG15118	Dmel_CG15118	0	0.232665	0.28125	0.5	0.181675
Pp2A-29B	Dmel_CG17291	0	0.232554	0.28125	0.5	0.181603
CG11266	Dmel_CG11266	0	0.23253	0.28125	0.5	0.181588
Rb97D	Dmel_CG6354	0	0.232527	0.28125	0.5	0.181586
Rop	Dmel_CG15811	0	0.232493	0.28125	0.5	0.181564
rdo	Dmel_CG15151	0	0.23249	0.28125	0.5	0.181562
cue	Dmel_CG12086	-1	0.232456	0.28125	0.5	0.18154
CG12090	Dmel_CG12090	0	0.232287	0.28125	0.5	0.18143
Acon	Dmel_CG9244	0	0.232077	0.28125	0.5	0.181294
Scamp	Dmel_CG9195	0	0.232051	0.28125	0.5	0.181277
dap	Dmel_CG1772	0	0.231988	0.28125	0.5	0.181237
CG12004	Dmel_CG12004	0	0.231541	0.28125	0.5	0.180948
CG8475	Dmel_CG8475	0	0.231539	0.28125	0.5	0.180946
ClC-b	Dmel_CG8594	0	0.23144	0.28125	0.5	0.180882
ths	Dmel_CG12443	0	0.231344	0.28125	0.5	0.18082
Prosap	Dmel_CG30483	0	0.231162	0.28125	0.5	0.180703
CG31751	Dmel_CG31751	0	0.231145	0.28125	0.5	0.180692
tub	Dmel_CG10520	0	0.231083	0.28125	0.5	0.180652
Pi4KIIalpha	Dmel_CG2929	0	0.231038	0.28125	0.5	0.180623
Hrs	Dmel_CG2903	0	0.231017	0.28125	0.5	0.180609
Lrrk	Dmel_CG5483	0	0.230934	0.28125	0.5	0.180555
sNPF	Dmel_CG13968	0	0.230917	0.28125	0.5	0.180544
CG5726	Dmel_CG5726	0	0.230722	0.28125	0.5	0.180419
endoB	Dmel_CG9834	0	0.230722	0.28125	0.5	0.180419
Reps	Dmel_CG6192	0	0.230689	0.28125	0.5	0.180397
Sh	Dmel_CG12348	0	0.230466	0.28125	0.5	0.180254
Aplip1	Dmel_CG1200	0	0.230454	0.28125	0.5	0.180246
pkaap	Dmel_CG4132	0	0.230384	0.28125	0.5	0.180201
Msp-300	Dmel_CG42768	0	0.230341	0.28125	0.5	0.180173
lin19	Dmel_CG1877	0	0.23003	0.28125	0.5	0.179973
Nopp140	Dmel_CG7421	0	0.22994	0.28125	0.5	0.179915
CG3847	Dmel_CG3847	0	0.229822	0.28125	0.5	0.179839
ogre	Dmel_CG3039	0	0.229815	0.28125	0.5	0.179834
mbt	Dmel_CG18582	0	0.229731	0.28125	0.5	0.17978
CG4091	Dmel_CG4091	0	0.22961	0.28125	0.5	0.179703
CG7518	Dmel_CG7518	0	0.229557	0.28125	0.5	0.179668
dnr1	Dmel_CG12489	0	0.22943	0.28125	0.5	0.179587
Rbp2	Dmel_CG4429	0	0.229331	0.28125	0.5	0.179523
jumu	Dmel_CG4029	0	0.229315	0.28125	0.5	0.179513
Hmu	Dmel_CG3373	0	0.229211	0.28125	0.5	0.179446
CG33558	Dmel_CG33558	0	0.22917	0.28125	0.5	0.17942
CG9317	Dmel_CG9317	0	0.229152	0.28125	0.5	0.179408
Invadolysin	Dmel_CG3953	0	0.229083	0.28125	0.5	0.179364
enok	Dmel_CG11290	0	0.228755	0.28125	0.5	0.179153
CG13631	Dmel_CG13631	0	0.228748	0.28125	0.5	0.179149
CG11807	Dmel_CG11807	0	0.228724	0.28125	0.5	0.179134
CG12091	Dmel_CG12091	0	0.228413	0.28125	0.5	0.178934
dpr19	Dmel_CG13140	0	0.228273	0.28125	0.5	0.178844
rho-4	Dmel_CG1697	0	0.228205	0.28125	0.5	0.178801
CG32549	Dmel_CG32549	0	0.228199	0.28125	0.5	0.178797
CG14509	Dmel_CG14509	0	0.228052	0.28125	0.5	0.178703
CG8500	Dmel_CG8500	0	0.228038	0.28125	0.5	0.178694
EDTP	Dmel_CG6542	0	0.228	0.28125	0.5	0.17867
cher	Dmel_CG3937	0	0.227952	0.28125	0.5	0.178639
CG10326	Dmel_CG10326	0	0.227808	0.28125	0.5	0.178547
CG11448	Dmel_CG11448	0	0.227558	0.28125	0.5	0.178387
l(2)k14710	Dmel_CG8325	0	0.22748	0.28125	0.5	0.178337
CG6145	Dmel_CG6145	0	0.227337	0.28125	0.5	0.178246
beat-IIIc	Dmel_CG15138	0	0.22727	0.28125	0.5	0.178203
BtbVII	Dmel_CG11494	0	0.227269	0.28125	0.5	0.178202
l(1)G0232	Dmel_CG32697	0	0.226664	0.28125	0.5	0.177816
CG3680	Dmel_CG3680	0	0.226587	0.28125	0.5	0.177767
bur	Dmel_CG9242	0	0.226415	0.28125	0.5	0.177657
Pfrx	Dmel_CG3400	0	0.226407	0.28125	0.5	0.177652
wdp	Dmel_CG3413	0	0.226061	0.28125	0.5	0.177432
CG15270	Dmel_CG15270	0	0.226054	0.28125	0.5	0.177427
loqs	Dmel_CG6866	0	0.22597	0.28125	0.5	0.177374
CG5146	Dmel_CG5146	0	0.225586	0.28125	0.5	0.17713
ken	Dmel_CG5575	0	0.225491	0.28125	0.5	0.177069
Rat1	Dmel_CG10354	0	0.225438	0.28125	0.5	0.177036
CG3860	Dmel_CG3860	-1	0.225427	0.28125	0.5	0.177029
CG5521	Dmel_CG5521	0	0.225358	0.28125	0.5	0.176985
CG9934	Dmel_CG9934	0	0.225307	0.28125	0.5	0.176952
sqz	Dmel_CG5557	0	0.225128	0.28125	0.5	0.176839
kek5	Dmel_CG12199	0	0.225122	0.28125	0.5	0.176835
CG7222	Dmel_CG7222	0	0.224945	0.28125	0.5	0.176722
Gel	Dmel_CG1106	0	0.224885	0.28125	0.5	0.176684
mirr	Dmel_CG10601	0	0.224648	0.28125	0.5	0.176534
eIF3-S8	Dmel_CG4954	0	0.224571	0.28125	0.5	0.176485
mrj	Dmel_CG8448	0	0.224516	0.28125	0.5	0.17645
Hil	Dmel_CG30147	0	0.224441	0.28125	0.5	0.176403
CG11874	Dmel_CG11874	0	0.22434	0.28125	0.5	0.176339
CG32428	Dmel_CG32428	0	0.224283	0.28125	0.5	0.176303
vir-1	Dmel_CG31764	0	0.224216	0.28125	0.5	0.17626
CG42321	Dmel_CG42321	0	0.224157	0.28125	0.5	0.176223
sol	Dmel_CG1391	0	0.224131	0.28125	0.5	0.176206
Syx6	Dmel_CG7736	0	0.224044	0.28125	0.5	0.176151
Rab30	Dmel_CG9100	0	0.224021	0.28125	0.5	0.176137
Toll-6	Dmel_CG7250	0	0.223981	0.28125	0.5	0.176111
CG1516	Dmel_CG1516	0	0.223787	0.28125	0.5	0.175989
N	Dmel_CG3936	0	0.223786	0.28125	0.5	0.175988
Traf-like	Dmel_CG4394	0	0.223724	0.28125	0.5	0.175949
CG14989	Dmel_CG14989	0	0.223631	0.28125	0.5	0.17589
CG2025	Dmel_CG2025	0	0.223607	0.28125	0.5	0.175875
CG8290	Dmel_CG8290	0	0.223596	0.28125	0.5	0.175868
CG6923	Dmel_CG6923	0	0.223464	0.28125	0.5	0.175784
CG3548	Dmel_CG3548	0	0.223335	0.28125	0.5	0.175703
Ndae1	Dmel_CG42253	0	0.223271	0.28125	0.5	0.175663
TMS1	Dmel_CG4672	0	0.223148	0.28125	0.5	0.175585
Frq1	Dmel_CG5744	0	0.22302	0.28125	0.5	0.175504
galectin	Dmel_CG11372	0	0.222975	0.28125	0.5	0.175476
Ef2b	Dmel_CG2238	0	0.22296	0.28125	0.5	0.175466
CG10462	Dmel_CG10462	0	0.222872	0.28125	0.5	0.175411
Pnn	Dmel_CG8383	0	0.22282	0.28125	0.5	0.175378
htt	Dmel_CG9995	0	0.22275	0.28125	0.5	0.175334
CG11984	Dmel_CG11984	0	0.222728	0.28125	0.5	0.17532
RhoGEF3	Dmel_CG42378	0	0.222717	0.28125	0.5	0.175313
CG14995	Dmel_CG14995	0	0.222645	0.28125	0.5	0.175267
CG18659	Dmel_CG18659	0	0.222534	0.28125	0.5	0.175197
Hsc70-5	Dmel_CG8542	0	0.222507	0.28125	0.5	0.17518
Ptp61F	Dmel_CG9181	0	0.222431	0.28125	0.5	0.175133
CG17598	Dmel_CG17598	0	0.222387	0.28125	0.5	0.175105
CG7028	Dmel_CG7028	0	0.222055	0.28125	0.5	0.174896
CG4678	Dmel_CG4678	0	0.221884	0.28125	0.5	0.174788
CG17754	Dmel_CG17754	0	0.221814	0.28125	0.5	0.174744
Dhap-at	Dmel_CG4625	0	0.22176	0.28125	0.5	0.17471
CDase	Dmel_CG1471	0	0.22135	0.28125	0.5	0.174452
CG4502	Dmel_CG4502	0	0.221331	0.28125	0.5	0.17444
moody	Dmel_CG4322	0	0.22122	0.28125	0.5	0.174371
Mdh	Dmel_CG5889	0	0.220927	0.28125	0.5	0.174187
CG7456	Dmel_CG7456	0	0.220528	0.28125	0.5	0.173937
CG6364	Dmel_CG6364	0	0.220297	0.28125	0.5	0.173792
ASPP	Dmel_CG18375	0	0.220278	0.28125	0.5	0.17378
cpx	Dmel_CG32490	0	0.220263	0.28125	0.5	0.173771
CG2177	Dmel_CG2177	0	0.220029	0.28125	0.5	0.173624
Prp8	Dmel_CG8877	0	0.220014	0.28125	0.5	0.173615
Fer1HCH	Dmel_CG2216	0	0.219958	0.28125	0.5	0.17358
CG5262	Dmel_CG5262	0	0.219857	0.28125	0.5	0.173516
CG12236	Dmel_CG12236	0	0.219821	0.28125	0.5	0.173494
CG6115	Dmel_CG6115	0	0.219784	0.28125	0.5	0.173471
RpL23A	Dmel_CG7977	0	0.219778	0.28125	0.5	0.173467
Smg6	Dmel_CG6369	0	0.219712	0.28125	0.5	0.173426
Mmp1	Dmel_CG4859	0	0.219633	0.28125	0.5	0.173376
CG9990	Dmel_CG9990	0	0.21953	0.28125	0.5	0.173312
Mtl	Dmel_CG5588	0	0.219141	0.28125	0.5	0.173069
CG32810	Dmel_CG32810	0	0.219085	0.28125	0.5	0.173034
CG33092	Dmel_CG33092	0	0.219037	0.28125	0.5	0.173004
ref(2)P	Dmel_CG10360	0	0.218986	0.28125	0.5	0.172972
Ca-alpha1D	Dmel_CG4894	0	0.218982	0.28125	0.5	0.17297
C1GalTA	Dmel_CG9520	0	0.218823	0.28125	0.5	0.172871
GABA-B-R2	Dmel_CG6706	0	0.218749	0.28125	0.5	0.172824
grh	Dmel_CG42311	0	0.218566	0.28125	0.5	0.17271
mrt	Dmel_CG3361	0	0.218349	0.28125	0.5	0.172575
CG11163	Dmel_CG11163	0	0.218313	0.28125	0.5	0.172553
CG6805	Dmel_CG6805	0	0.218272	0.28125	0.5	0.172527
CG8188	Dmel_CG8188	0	0.218157	0.28125	0.5	0.172456
CG11210	Dmel_CG11210	0	0.217995	0.28125	0.5	0.172355
sog	Dmel_CG9224	0	0.217959	0.28125	0.5	0.172332
Eip74EF	Dmel_CG32180	0	0.217908	0.28125	0.5	0.172301
Dgp-1	Dmel_CG5729	0	0.217746	0.28125	0.5	0.1722
CG10803	Dmel_CG10803	0	0.217741	0.28125	0.5	0.172197
Gcn2	Dmel_CG1609	0	0.217651	0.28125	0.5	0.172141
CG17528	Dmel_CG17528	0	0.217266	0.28125	0.5	0.171902
CG2807	Dmel_CG2807	0	0.217136	0.28125	0.5	0.171821
CG31523	Dmel_CG31523	0	0.217103	0.28125	0.5	0.1718
Gl	Dmel_CG9206	0	0.217013	0.28125	0.5	0.171745
bbg	Dmel_CG42230	0	0.21697	0.28125	0.5	0.171718
CG6024	Dmel_CG6024	0	0.216636	0.28125	0.5	0.171511
Klp10A	Dmel_CG1453	0	0.216625	0.28125	0.5	0.171504
gcl	Dmel_CG8411	0	0.216423	0.28125	0.5	0.171379
CG18135	Dmel_CG18135	0	0.216324	0.28125	0.5	0.171317
CG8468	Dmel_CG8468	0	0.216288	0.28125	0.5	0.171295
CG13933	Dmel_CG13933	0	0.215768	0.28125	0.5	0.170973
TSG101	Dmel_CG9712	0	0.215733	0.28125	0.5	0.170952
CG9170	Dmel_CG9170	0	0.215576	0.28125	0.5	0.170855
CG5823	Dmel_CG5823	0	0.215565	0.28125	0.5	0.170848
Nhe1	Dmel_CG12178	0	0.215324	0.28125	0.5	0.170699
CG17838	Dmel_CG17838	0	0.215311	0.28125	0.5	0.170691
CG34133	Dmel_CG34133	0	0.215249	0.28125	0.5	0.170653
Atg5	Dmel_CG1643	0	0.215121	0.28125	0.5	0.170574
pelo	Dmel_CG3959	0	0.214902	0.28125	0.5	0.170439
lace	Dmel_CG4162	0	0.214788	0.28125	0.5	0.170368
Syt7	Dmel_CG2381	0	0.214703	0.28125	0.5	0.170316
cdc14	Dmel_CG7134	0	0.21467	0.28125	0.5	0.170296
CG3363	Dmel_CG3363	0	0.214612	0.28125	0.5	0.17026
ade5	Dmel_CG3989	0	0.21451	0.28125	0.5	0.170197
CG1463	Dmel_CG1463	0	0.214377	0.28125	0.5	0.170115
DopEcR	Dmel_CG18314	0	0.214377	0.28125	0.5	0.170115
CG42258	Dmel_CG42258	0	0.214247	0.28125	0.5	0.170035
CG3257	Dmel_CG3257	0	0.214039	0.28125	0.5	0.169907
CG11206	Dmel_CG11206	0	0.213695	0.28125	0.5	0.169696
tankyrase	Dmel_CG4719	0	0.213562	0.28125	0.5	0.169614
CG2258	Dmel_CG2258	0	0.213491	0.28125	0.5	0.16957
gfzf	Dmel_CG33546	0	0.21334	0.28125	0.5	0.169477
Ugt	Dmel_CG6850	0	0.213337	0.28125	0.5	0.169476
Treh	Dmel_CG9364	0	0.213208	0.28125	0.5	0.169396
cal1	Dmel_CG5148	0	0.213054	0.28125	0.5	0.169302
CG18766	Dmel_CG18766	0	0.213031	0.28125	0.5	0.169288
katanin-60	Dmel_CG10229	0	0.212967	0.28125	0.5	0.169249
dos	Dmel_CG1044	0	0.212916	0.28125	0.5	0.169217
CG32177	Dmel_CG32177	0	0.212818	0.28125	0.5	0.169157
Ent1	Dmel_CG11907	0	0.212579	0.28125	0.5	0.169011
CG7185	Dmel_CG7185	0	0.212471	0.28125	0.5	0.168945
TepII	Dmel_CG7052	0	0.212437	0.28125	0.5	0.168924
cp309	Dmel_CG33957	0	0.212403	0.28125	0.5	0.168903
CoRest	Dmel_CG42687	-1	0.21225	0.28125	0.5	0.168809
whd	Dmel_CG12891	0	0.21223	0.28125	0.5	0.168797
CG1677	Dmel_CG1677	0	0.21219	0.28125	0.5	0.168773
Eaf	Dmel_CG11166	0	0.21202	0.28125	0.5	0.168669
bc10	Dmel_CG4867	0	0.211999	0.28125	0.5	0.168656
CG4239	Dmel_CG4239	0	0.211934	0.28125	0.5	0.168616
Ranbp16	Dmel_CG33180	0	0.211873	0.28125	0.5	0.168579
CG1718	Dmel_CG1718	0	0.211804	0.28125	0.5	0.168536
GluClalpha	Dmel_CG7535	0	0.211761	0.28125	0.5	0.16851
CG7536	Dmel_CG7536	0	0.211759	0.28125	0.5	0.168509
FucT6	Dmel_CG2448	0	0.211715	0.28125	0.5	0.168482
Nca	Dmel_CG7641	0	0.211598	0.28125	0.5	0.168411
CG13248	Dmel_CG13248	0	0.211588	0.28125	0.5	0.168404
RpS4	Dmel_CG11276	0	0.211502	0.28125	0.5	0.168352
mnb	Dmel_CG42273	0	0.2114	0.28125	0.5	0.16829
CG12299	Dmel_CG12299	0	0.211301	0.28125	0.5	0.168229
Pk92B	Dmel_CG4720	0	0.2111	0.28125	0.5	0.168107
mip120	Dmel_CG6061	0	0.211048	0.28125	0.5	0.168075
MTF-1	Dmel_CG3743	0	0.210822	0.28125	0.5	0.167937
CG30020	Dmel_CG30020	0	0.210695	0.28125	0.5	0.16786
Mi-2	Dmel_CG8103	0	0.210682	0.28125	0.5	0.167852
CG9153	Dmel_CG9153	0	0.21056	0.28125	0.5	0.167777
CG7708	Dmel_CG7708	0	0.210439	0.28125	0.5	0.167704
Cap	Dmel_CG9802	0	0.210302	0.28125	0.5	0.16762
CG7065	Dmel_CG7065	0	0.210293	0.28125	0.5	0.167615
foi	Dmel_CG6817	0	0.21021	0.28125	0.5	0.167564
Act87E	Dmel_CG18290	-1	0.210203	0.28125	0.5	0.16756
Sema-5c	Dmel_CG5661	0	0.210172	0.28125	0.5	0.167541
CG2219	Dmel_CG2219	0	0.210154	0.28125	0.5	0.16753
bmm	Dmel_CG5295	0	0.210093	0.28125	0.5	0.167493
spin	Dmel_CG8428	0	0.209963	0.28125	0.5	0.167414
CG8924	Dmel_CG8924	0	0.209953	0.28125	0.5	0.167408
CG3287	Dmel_CG3287	0	0.209803	0.28125	0.5	0.167317
Tsp97E	Dmel_CG6323	0	0.20977	0.28125	0.5	0.167297
CG17370	Dmel_CG17370	0	0.209767	0.28125	0.5	0.167295
Wnt4	Dmel_CG4698	0	0.209767	0.28125	0.5	0.167295
lilli	Dmel_CG8817	0	0.209763	0.28125	0.5	0.167293
CG5447	Dmel_CG5447	0	0.209712	0.28125	0.5	0.167262
beat-Ic	Dmel_CG4838	0	0.209568	0.28125	0.5	0.167174
CG4230	Dmel_CG4230	0	0.209528	0.28125	0.5	0.16715
cpa	Dmel_CG10540	0	0.209511	0.28125	0.5	0.167139
CG34415	Dmel_CG34415	0	0.209496	0.28125	0.5	0.16713
M6	Dmel_CG7540	0	0.209332	0.28125	0.5	0.167031
CG8108	Dmel_CG8108	0	0.209287	0.28125	0.5	0.167004
CG12730	Dmel_CG12730	0	0.209138	0.28125	0.5	0.166913
Rbf	Dmel_CG7413	0	0.208951	0.28125	0.5	0.1668
l(1)G0320	Dmel_CG32701	0	0.208709	0.28125	0.5	0.166653
CG14442	Dmel_CG14442	0	0.208639	0.28125	0.5	0.166611
X11Lbeta	Dmel_CG32677	0	0.208537	0.28125	0.5	0.166549
Spt6	Dmel_CG12225	0	0.208467	0.28125	0.5	0.166507
Cha	Dmel_CG12345	0	0.208314	0.28125	0.5	0.166414
CG2246	Dmel_CG2246	0	0.208261	0.28125	0.5	0.166382
CG10743	Dmel_CG10743	0	0.208105	0.28125	0.5	0.166287
Su(var)2-10	Dmel_CG8068	0	0.207914	0.28125	0.5	0.166172
Nplp1	Dmel_CG3441	0	0.207901	0.28125	0.5	0.166164
fkh	Dmel_CG10002	0	0.20789	0.28125	0.5	0.166158
blot	Dmel_CG3897	0	0.207867	0.28125	0.5	0.166144
RIC-3	Dmel_CG30296	0	0.207817	0.28125	0.5	0.166113
CG11055	Dmel_CG11055	0	0.207803	0.28125	0.5	0.166105
Eaat1	Dmel_CG3747	0	0.207646	0.28125	0.5	0.16601
fz	Dmel_CG17697	0	0.207635	0.28125	0.5	0.166003
CG17646	Dmel_CG17646	0	0.20755	0.28125	0.5	0.165952
Rfabg	Dmel_CG11064	0	0.207526	0.28125	0.5	0.165938
CG5337	Dmel_CG5337	0	0.207514	0.28125	0.5	0.16593
Pngl	Dmel_CG7865	0	0.20748	0.28125	0.5	0.16591
CG7879	Dmel_CG7879	0	0.207465	0.28125	0.5	0.165901
repo	Dmel_CG31240	0	0.20746	0.28125	0.5	0.165898
Cbp53E	Dmel_CG6702	0	0.207446	0.28125	0.5	0.165889
CG11198	Dmel_CG11198	0	0.207156	0.28125	0.5	0.165714
Usf	Dmel_CG17592	0	0.207136	0.28125	0.5	0.165702
by	Dmel_CG9379	0	0.207115	0.28125	0.5	0.16569
MYPT-75D	Dmel_CG6896	0	0.207094	0.28125	0.5	0.165677
D19A	Dmel_CG10269	0	0.207088	0.28125	0.5	0.165673
sqh	Dmel_CG3595	0	0.207019	0.28125	0.5	0.165632
CG5026	Dmel_CG5026	0	0.206935	0.28125	0.5	0.165581
rump	Dmel_CG9373	0	0.206706	0.28125	0.5	0.165443
CG5758	Dmel_CG5758	0	0.206683	0.28125	0.5	0.165429
jeb	Dmel_CG30040	0	0.206543	0.28125	0.5	0.165345
Rheb	Dmel_CG1081	0	0.206511	0.28125	0.5	0.165326
pdm3	Dmel_CG42698	0	0.206433	0.28125	0.5	0.165279
Mhcl	Dmel_CG31045	0	0.206249	0.28125	0.5	0.165168
wee	Dmel_CG4488	0	0.206234	0.28125	0.5	0.165159
bs	Dmel_CG3411	0	0.206135	0.28125	0.5	0.1651
Esyt2	Dmel_CG6643	0	0.206038	0.28125	0.5	0.165041
Ppcs	Dmel_CG5629	0	0.205945	0.28125	0.5	0.164985
bol	Dmel_CG4760	0	0.205897	0.28125	0.5	0.164957
CG6175	Dmel_CG6175	0	0.205464	0.28125	0.5	0.164696
GckIII	Dmel_CG5169	0	0.205436	0.28125	0.5	0.16468
Mob4	Dmel_CG3403	0	0.20541	0.28125	0.5	0.164664
CG2186	Dmel_CG2186	0	0.205407	0.28125	0.5	0.164662
CG10083	Dmel_CG10083	0	0.205405	0.28125	0.5	0.164661
CG8613	Dmel_CG8613	0	0.205371	0.28125	0.5	0.164641
sinu	Dmel_CG10624	0	0.205275	0.28125	0.5	0.164583
TH1	Dmel_CG9984	0	0.205232	0.28125	0.5	0.164557
pck	Dmel_CG14779	0	0.205215	0.28125	0.5	0.164547
mib2	Dmel_CG17492	0	0.205185	0.28125	0.5	0.164529
shg	Dmel_CG3722	0	0.205166	0.28125	0.5	0.164518
ALiX	Dmel_CG12876	0	0.204998	0.28125	0.5	0.164417
Hr46	Dmel_CG33183	0	0.204957	0.28125	0.5	0.164392
CG4928	Dmel_CG4928	0	0.204925	0.28125	0.5	0.164373
Set2	Dmel_CG1716	0	0.204662	0.28125	0.5	0.164216
Mgat2	Dmel_CG7921	0	0.204556	0.28125	0.5	0.164152
px	Dmel_CG4444	0	0.204381	0.28125	0.5	0.164048
pnt	Dmel_CG17077	0	0.20431	0.28125	0.5	0.164005
CG2918	Dmel_CG2918	0	0.204299	0.28125	0.5	0.163999
CG13398	Dmel_CG13398	0	0.204262	0.28125	0.5	0.163976
CG6656	Dmel_CG6656	0	0.204204	0.28125	0.5	0.163942
wls	Dmel_CG6210	0	0.204175	0.28125	0.5	0.163924
CG5036	Dmel_CG5036	0	0.204024	0.28125	0.5	0.163834
CG9634	Dmel_CG9634	0	0.204014	0.28125	0.5	0.163828
CG11412	Dmel_CG11412	0	0.203973	0.28125	0.5	0.163804
CG12582	Dmel_CG12582	0	0.203853	0.28125	0.5	0.163732
Ubi-p5E	Dmel_CG32744	0	0.20375	0.28125	0.5	0.163671
CG9304	Dmel_CG9304	0	0.203738	0.28125	0.5	0.163663
Sap30	Dmel_CG4756	0	0.203366	0.28125	0.5	0.163441
qtc	Dmel_CG14039	0	0.20327	0.28125	0.5	0.163384
Vps16A	Dmel_CG8454	0	0.203102	0.28125	0.5	0.163284
SRm160	Dmel_CG11274	0	0.20303	0.28125	0.5	0.163241
Tab2	Dmel_CG7417	0	0.202807	0.28125	0.5	0.163108
CG1902	Dmel_CG1902	0	0.202755	0.28125	0.5	0.163077
Ent3	Dmel_CG11010	0	0.202621	0.28125	0.5	0.162998
CG18177	Dmel_CG18177	0	0.20262	0.28125	0.5	0.162997
CG12272	Dmel_CG12272	0	0.202619	0.28125	0.5	0.162996
tsh	Dmel_CG1374	0	0.202593	0.28125	0.5	0.162981
CG7149	Dmel_CG7149	0	0.202316	0.28125	0.5	0.162816
Droj2	Dmel_CG8863	0	0.202268	0.28125	0.5	0.162788
Ac76E	Dmel_CG7978	0	0.202265	0.28125	0.5	0.162786
RpL12	Dmel_CG3195	0	0.202243	0.28125	0.5	0.162773
CG33214	Dmel_CG33214	0	0.202243	0.28125	0.5	0.162773
CG11526	Dmel_CG11526	0	0.202139	0.28125	0.5	0.162711
CG6734	Dmel_CG6734	0	0.202103	0.28125	0.5	0.162689
skpA	Dmel_CG16983	0	0.201937	0.28125	0.5	0.162591
snama	Dmel_CG3231	0	0.201929	0.28125	0.5	0.162586
CG17698	Dmel_CG17698	0	0.201869	0.28125	0.5	0.16255
mthl1	Dmel_CG4521	0	0.201777	0.28125	0.5	0.162496
frj	Dmel_CG9526	0	0.201763	0.28125	0.5	0.162488
CG18815	Dmel_CG18815	0	0.201444	0.28125	0.5	0.162298
CG17486	Dmel_CG17486	0	0.201355	0.28125	0.5	0.162245
Kr-h2	Dmel_CG9159	0	0.201309	0.28125	0.5	0.162218
cbs	Dmel_CG4840	0	0.201141	0.28125	0.5	0.162119
CG16947	Dmel_CG16947	0	0.200942	0.28125	0.5	0.162001
Mlc-c	Dmel_CG3201	0	0.200913	0.28125	0.5	0.161984
CG5010	Dmel_CG5010	0	0.200808	0.28125	0.5	0.161921
CG9619	Dmel_CG9619	0	0.200797	0.28125	0.5	0.161915
Aef1	Dmel_CG5683	0	0.200767	0.28125	0.5	0.161897
CG5482	Dmel_CG5482	0	0.200716	0.28125	0.5	0.161867
svp	Dmel_CG11502	0	0.200702	0.28125	0.5	0.161859
RabX4	Dmel_CG31118	0	0.200322	0.28125	0.5	0.161634
Psc	Dmel_CG3886	0	0.200191	0.28125	0.5	0.161557
CG33056	Dmel_CG33056	0	0.200075	0.28125	0.5	0.161488
CG33116	Dmel_CG33116	0	0.199964	0.28125	0.5	0.161422
Grip163	Dmel_CG5688	0	0.199958	0.28125	0.5	0.161419
Rab6	Dmel_CG6601	0	0.199844	0.28125	0.5	0.161352
CG4495	Dmel_CG4495	0	0.199833	0.28125	0.5	0.161345
svr	Dmel_CG4122	0	0.199741	0.28125	0.5	0.161291
CG12945	Dmel_CG12945	0	0.19972	0.28125	0.5	0.161278
synaptogyrin	Dmel_CG10808	0	0.19967	0.28125	0.5	0.161249
CG2943	Dmel_CG2943	0	0.199486	0.28125	0.5	0.16114
CG30069	Dmel_CG30069	0	0.199357	0.28125	0.5	0.161064
CG42663	Dmel_CG42663	0	0.199343	0.28125	0.5	0.161056
Sip1	Dmel_CG10939	0	0.199295	0.28125	0.5	0.161028
Topors	Dmel_CG15104	0	0.199091	0.28125	0.5	0.160908
CHIP	Dmel_CG5203	0	0.199025	0.28125	0.5	0.160869
srpk79D	Dmel_CG11489	0	0.199001	0.28125	0.5	0.160855
CG31140	Dmel_CG31140	0	0.19893	0.28125	0.5	0.160813
app	Dmel_CG42318	0	0.198903	0.28125	0.5	0.160797
CG13800	Dmel_CG13800	0	0.198841	0.28125	0.5	0.16076
Actn	Dmel_CG4376	0	0.198819	0.28125	0.5	0.160748
CG10103	Dmel_CG10103	0	0.198667	0.28125	0.5	0.160658
Aats-ile	Dmel_CG11471	0	0.198513	0.28125	0.5	0.160568
jdp	Dmel_CG2239	0	0.19821	0.28125	0.5	0.160389
CG32350	Dmel_CG32350	0	0.198207	0.28125	0.5	0.160388
Top1	Dmel_CG6146	0	0.198106	0.28125	0.5	0.160328
CG4829	Dmel_CG4829	0	0.198065	0.28125	0.5	0.160304
hang	Dmel_CG32575	0	0.198026	0.28125	0.5	0.160281
homer	Dmel_CG11324	0	0.198019	0.28125	0.5	0.160277
CG7565	Dmel_CG7565	0	0.198012	0.28125	0.5	0.160273
CG5028	Dmel_CG5028	0	0.197696	0.28125	0.5	0.160088
CkIIalpha	Dmel_CG17520	0	0.197658	0.28125	0.5	0.160065
CG3077	Dmel_CG3077	0	0.197422	0.28125	0.5	0.159927
CG3651	Dmel_CG3651	0	0.197284	0.28125	0.5	0.159846
oc	Dmel_CG12154	0	0.197248	0.28125	0.5	0.159825
5PtaseI	Dmel_CG42283	0	0.197148	0.28125	0.5	0.159767
CG5642	Dmel_CG5642	0	0.197002	0.28125	0.5	0.159681
unc79	Dmel_CG5237	0	0.196972	0.28125	0.5	0.159664
e(y)3	Dmel_CG12238	0	0.196954	0.28125	0.5	0.159653
kn	Dmel_CG10197	0	0.196933	0.28125	0.5	0.159641
CG3655	Dmel_CG3655	0	0.196757	0.28125	0.5	0.159538
Ser	Dmel_CG6127	0	0.196715	0.28125	0.5	0.159513
CG1172	Dmel_CG1172	0	0.196566	0.28125	0.5	0.159426
Eps-15	Dmel_CG16932	0	0.196466	0.28125	0.5	0.159368
phl	Dmel_CG2845	0	0.196338	0.28125	0.5	0.159293
CG17683	Dmel_CG17683	0	0.196291	0.28125	0.5	0.159265
CG8312	Dmel_CG8312	0	0.196242	0.28125	0.5	0.159237
mus210	Dmel_CG8153	0	0.196216	0.28125	0.5	0.159222
chm	Dmel_CG5229	0	0.196214	0.28125	0.5	0.15922
CG5916	Dmel_CG5916	0	0.195706	0.28125	0.5	0.158924
CG9008	Dmel_CG9008	0	0.195611	0.28125	0.5	0.158869
Vha68-2	Dmel_CG3762	0	0.195593	0.28125	0.5	0.158858
lea	Dmel_CG5481	0	0.19556	0.28125	0.5	0.158839
kek2	Dmel_CG4977	0	0.19549	0.28125	0.5	0.158798
CG2182	Dmel_CG2182	0	0.195477	0.28125	0.5	0.158791
Alk	Dmel_CG8250	0	0.19545	0.28125	0.5	0.158775
Adam	Dmel_CG12131	0	0.195412	0.28125	0.5	0.158753
CG5694	Dmel_CG5694	0	0.195388	0.28125	0.5	0.158739
CG1233	Dmel_CG1233	0	0.195372	0.28125	0.5	0.158729
CG12703	Dmel_CG12703	0	0.195353	0.28125	0.5	0.158718
CHKov1	Dmel_CG10618	0	0.195346	0.28125	0.5	0.158714
drm	Dmel_CG10016	0	0.195289	0.28125	0.5	0.158681
dmt	Dmel_CG8374	0	0.195256	0.28125	0.5	0.158662
PIP5K59B	Dmel_CG3682	0	0.195094	0.28125	0.5	0.158567
Shc	Dmel_CG3715	0	0.195081	0.28125	0.5	0.15856
gry	Dmel_CG17569	0	0.19507	0.28125	0.5	0.158554
l(1)G0156	Dmel_CG12233	0	0.195029	0.28125	0.5	0.15853
Kdm4B	Dmel_CG33182	0	0.194909	0.28125	0.5	0.15846
Gdi	Dmel_CG4422	0	0.194878	0.28125	0.5	0.158442
Vps4	Dmel_CG6842	0	0.194642	0.28125	0.5	0.158305
CG4165	Dmel_CG4165	0	0.194585	0.28125	0.5	0.158271
CG8243	Dmel_CG8243	0	0.194486	0.28125	0.5	0.158214
mib1	Dmel_CG5841	0	0.194324	0.28125	0.5	0.15812
CG32204	Dmel_CG32204	0	0.194168	0.28125	0.5	0.158029
CG12581	Dmel_CG12581	0	0.194069	0.28125	0.5	0.157972
CG17184	Dmel_CG17184	0	0.193808	0.28125	0.5	0.15782
CG14782	Dmel_CG14782	0	0.193784	0.28125	0.5	0.157807
CG14200	Dmel_CG14200	0	0.19372	0.28125	0.5	0.157769
n-syb	Dmel_CG17248	0	0.193634	0.28125	0.5	0.15772
CG11870	Dmel_CG11870	0	0.193583	0.28125	0.5	0.15769
CG31665	Dmel_CG31665	0	0.193261	0.28125	0.5	0.157504
beat-IIa	Dmel_CG14334	0	0.193247	0.28125	0.5	0.157495
CG5004	Dmel_CG5004	0	0.193223	0.28125	0.5	0.157482
CG31886	Dmel_CG31886	0	0.193161	0.28125	0.5	0.157446
Pdk	Dmel_CG8808	0	0.193086	0.28125	0.5	0.157402
Tango10	Dmel_CG1841	0	0.19298	0.28125	0.5	0.157341
CG5938	Dmel_CG5938	0	0.192965	0.28125	0.5	0.157332
cpb	Dmel_CG17158	0	0.192948	0.28125	0.5	0.157323
sra	Dmel_CG6072	0	0.192676	0.28125	0.5	0.157165
yuri	Dmel_CG31732	0	0.192626	0.28125	0.5	0.157136
disp	Dmel_CG2019	0	0.192181	0.28125	0.5	0.156879
CG17271	Dmel_CG17271	0	0.192176	0.28125	0.5	0.156877
CG6218	Dmel_CG6218	0	0.192134	0.28125	0.5	0.156852
Paf-AHalpha	Dmel_CG8962	0	0.192111	0.28125	0.5	0.156839
CG16941	Dmel_CG16941	0	0.192006	0.28125	0.5	0.156779
CG4972	Dmel_CG4972	0	0.191841	0.28125	0.5	0.156683
fliI	Dmel_CG1484	0	0.191781	0.28125	0.5	0.156649
Rel	Dmel_CG11992	0	0.191747	0.28125	0.5	0.156629
CG8165	Dmel_CG8165	0	0.191742	0.28125	0.5	0.156626
Pis	Dmel_CG9245	0	0.191704	0.28125	0.5	0.156604
CG4420	Dmel_CG4420	0	0.191696	0.28125	0.5	0.1566
Ir	Dmel_CG6747	0	0.191687	0.28125	0.5	0.156595
CG7806	Dmel_CG7806	0	0.191654	0.28125	0.5	0.156576
beta4GalNAcTA	Dmel_CG8536	0	0.191599	0.28125	0.5	0.156544
CG17265	Dmel_CG17265	0	0.191339	0.28125	0.5	0.156394
eIF-4E	Dmel_CG4035	0	0.191161	0.28125	0.5	0.156292
CG10249	Dmel_CG10249	0	0.191156	0.28125	0.5	0.156289
Patj	Dmel_CG12021	0	0.190884	0.28125	0.5	0.156133
Ire1	Dmel_CG4583	0	0.190853	0.28125	0.5	0.156115
ATPsyn-beta	Dmel_CG11154	0	0.19064	0.28125	0.5	0.155992
CG9776	Dmel_CG9776	0	0.190544	0.28125	0.5	0.155937
CG17019	Dmel_CG17019	0	0.190485	0.28125	0.5	0.155903
Ephrin	Dmel_CG1862	0	0.190468	0.28125	0.5	0.155894
dsh	Dmel_CG18361	0	0.190276	0.28125	0.5	0.155783
CG1681	Dmel_CG1681	0	0.190252	0.28125	0.5	0.15577
HPS1	Dmel_CG12855	0	0.19024	0.28125	0.5	0.155763
scramb2	Dmel_CG1893	0	0.190194	0.28125	0.5	0.155736
l(3)76BDm	Dmel_CG8793	0	0.190166	0.28125	0.5	0.15572
D1	Dmel_CG9745	0	0.190101	0.28125	0.5	0.155683
Rhp	Dmel_CG8497	0	0.190004	0.28125	0.5	0.155628
smo	Dmel_CG11561	0	0.189813	0.28125	0.5	0.155518
CG5038	Dmel_CG5038	0	0.189631	0.28125	0.5	0.155414
MED6	Dmel_CG9473	0	0.189599	0.28125	0.5	0.155395
CG4733	Dmel_CG4733	0	0.189384	0.28125	0.5	0.155272
pix	Dmel_CG5651	0	0.189087	0.28125	0.5	0.155103
CG6398	Dmel_CG6398	0	0.188946	0.28125	0.5	0.155022
ptip	Dmel_CG32133	0	0.188762	0.28125	0.5	0.154917
Mipp2	Dmel_CG4317	0	0.188663	0.28125	0.5	0.15486
CG7686	Dmel_CG7686	0	0.18864	0.28125	0.5	0.154847
CG5805	Dmel_CG5805	0	0.188562	0.28125	0.5	0.154803
CG4552	Dmel_CG4552	0	0.188553	0.28125	0.5	0.154798
Acf1	Dmel_CG1966	0	0.188522	0.28125	0.5	0.15478
Kap-alpha3	Dmel_CG9423	0	0.188205	0.28125	0.5	0.154599
CG2135	Dmel_CG2135	0	0.18806	0.28125	0.5	0.154516
exo70	Dmel_CG7127	0	0.188053	0.28125	0.5	0.154512
CG5953	Dmel_CG5953	0	0.188053	0.28125	0.5	0.154512
Gad1	Dmel_CG14994	0	0.188009	0.28125	0.5	0.154487
yki	Dmel_CG4005	0	0.188006	0.28125	0.5	0.154486
key	Dmel_CG16910	0	0.187984	0.28125	0.5	0.154473
CG15628	Dmel_CG15628	0	0.187976	0.28125	0.5	0.154469
CG6040	Dmel_CG6040	0	0.187739	0.28125	0.5	0.154334
CG7372	Dmel_CG7372	0	0.187595	0.28125	0.5	0.154252
CG31689	Dmel_CG31689	0	0.18759	0.28125	0.5	0.154249
Upf2	Dmel_CG2253	0	0.187523	0.28125	0.5	0.154211
CycD	Dmel_CG9096	0	0.187382	0.28125	0.5	0.15413
blw	Dmel_CG3612	0	0.186975	0.28125	0.5	0.153899
ovo	Dmel_CG6824	0	0.186865	0.28125	0.5	0.153837
fus	Dmel_CG8205	0	0.186856	0.28125	0.5	0.153832
Sep1	Dmel_CG1403	0	0.186789	0.28125	0.5	0.153794
mamo	Dmel_CG34346	0	0.186781	0.28125	0.5	0.153789
gce	Dmel_CG42739	0	0.186779	0.28125	0.5	0.153788
CG11122	Dmel_CG11122	0	0.186741	0.28125	0.5	0.153766
CG5973	Dmel_CG5973	0	0.18669	0.28125	0.5	0.153737
CG9915	Dmel_CG9915	0	0.18645	0.28125	0.5	0.153601
MED1	Dmel_CG7162	0	0.186386	0.28125	0.5	0.153565
PpD3	Dmel_CG8402	0	0.18631	0.28125	0.5	0.153522
CG6490	Dmel_CG6490	0	0.186136	0.28125	0.5	0.153423
cdm	Dmel_CG7212	0	0.186098	0.28125	0.5	0.153402
Nep3	Dmel_CG9565	0	0.185686	0.28125	0.5	0.153168
bic	Dmel_CG3644	0	0.185597	0.28125	0.5	0.153118
CG5902	Dmel_CG5902	0	0.185536	0.28125	0.5	0.153084
hfw	Dmel_CG3095	0	0.185444	0.28125	0.5	0.153032
CG5618	Dmel_CG5618	0	0.185216	0.28125	0.5	0.152903
Ef1gamma	Dmel_CG11901	0	0.185211	0.28125	0.5	0.1529
Vinc	Dmel_CG3299	0	0.185167	0.28125	0.5	0.152875
CG8814	Dmel_CG8814	0	0.185118	0.28125	0.5	0.152847
TER94	Dmel_CG2331	0	0.185074	0.28125	0.5	0.152822
orb2	Dmel_CG5735	1	0.185057	0.28125	0.583333	0.152813
mip130	Dmel_CG3480	0	0.185009	0.28125	0.583333	0.152786
neuroligin	Dmel_CG13772	0	0.185	0.28125	0.583333	0.152781
CG13344	Dmel_CG13344	0	0.184966	0.28125	0.583333	0.152761
AP-1sigma	Dmel_CG5864	0	0.18479	0.28125	0.583333	0.152662
CG31048	Dmel_CG31048	0	0.18438	0.28125	0.583333	0.152431
CG13531	Dmel_CG13531	0	0.18428	0.28125	0.583333	0.152375
tbce	Dmel_CG7861	0	0.184258	0.28125	0.583333	0.152362
CG1298	Dmel_CG1298	0	0.184056	0.28125	0.583333	0.152248
CG12214	Dmel_CG12214	0	0.184	0.28125	0.583333	0.152217
Rad23	Dmel_CG1836	0	0.183933	0.28125	0.583333	0.152179
z	Dmel_CG7803	0	0.183763	0.28125	0.583333	0.152084
CG8121	Dmel_CG8121	0	0.183713	0.28125	0.583333	0.152055
CG31619	Dmel_CG31619	0	0.183576	0.28125	0.583333	0.151978
14-3-3epsilon	Dmel_CG31196	0	0.183418	0.28125	0.583333	0.15189
sls	Dmel_CG1915	0	0.183369	0.28125	0.583333	0.151862
CG8134	Dmel_CG8134	0	0.183259	0.28125	0.583333	0.1518
CG16721	Dmel_CG16721	0	0.183106	0.28125	0.583333	0.151714
ear	Dmel_CG4913	0	0.183075	0.28125	0.583333	0.151697
Mgat1	Dmel_CG13431	0	0.183042	0.28125	0.583333	0.151678
CG8379	Dmel_CG8379	0	0.182971	0.28125	0.583333	0.151639
AP-50	Dmel_CG7057	0	0.182961	0.28125	0.583333	0.151633
inaE	Dmel_CG33174	0	0.18294	0.28125	0.583333	0.151621
CG15465	Dmel_CG15465	0	0.182863	0.28125	0.583333	0.151578
[truncated: 10,659 more rows]
